# Supplementary material
Source: PubMed Central journal article supplement (PMC3574217)
Supplement: NIHMS433876-supplement-1_si_001.pdf [file NIHMS433876-supplement-1_si_001.pdf]

**Supporting Information:****5'-Phosphate and 5'-Phosphonate Ester Derivatives of (N)-Methanocarba  
Adenosine with in Vivo Cardioprotective Activity**

T. Santhosh Kumar, Tiehong Yang, Shilpi Mishra, Chunxia Cronin,  
Saibal Charkaborty, Bruce T. Liang, Kenneth A. Jacobson

| <b>Contents:</b>                                                                   | <b>page</b> |
|------------------------------------------------------------------------------------|-------------|
| <b>Spectroscopic and HPLC characterization of selected nucleotide derivatives.</b> | S2-S50      |
| <b>In vivo assay procedures and results (CSQ mouse model)</b>                      | S51-S56     |
| <b>Stability studies</b>                                                           | S57-S60     |
| <b>References</b>                                                                  | S61         |

Abbreviations: CSQ, calsequestrin; FS, fractional shortening; LV, left ventricular.

## Spectroscopic and HPLC characterization of selected nucleotide derivatives.

Compound 4,  $^{31}\text{P}$  NMR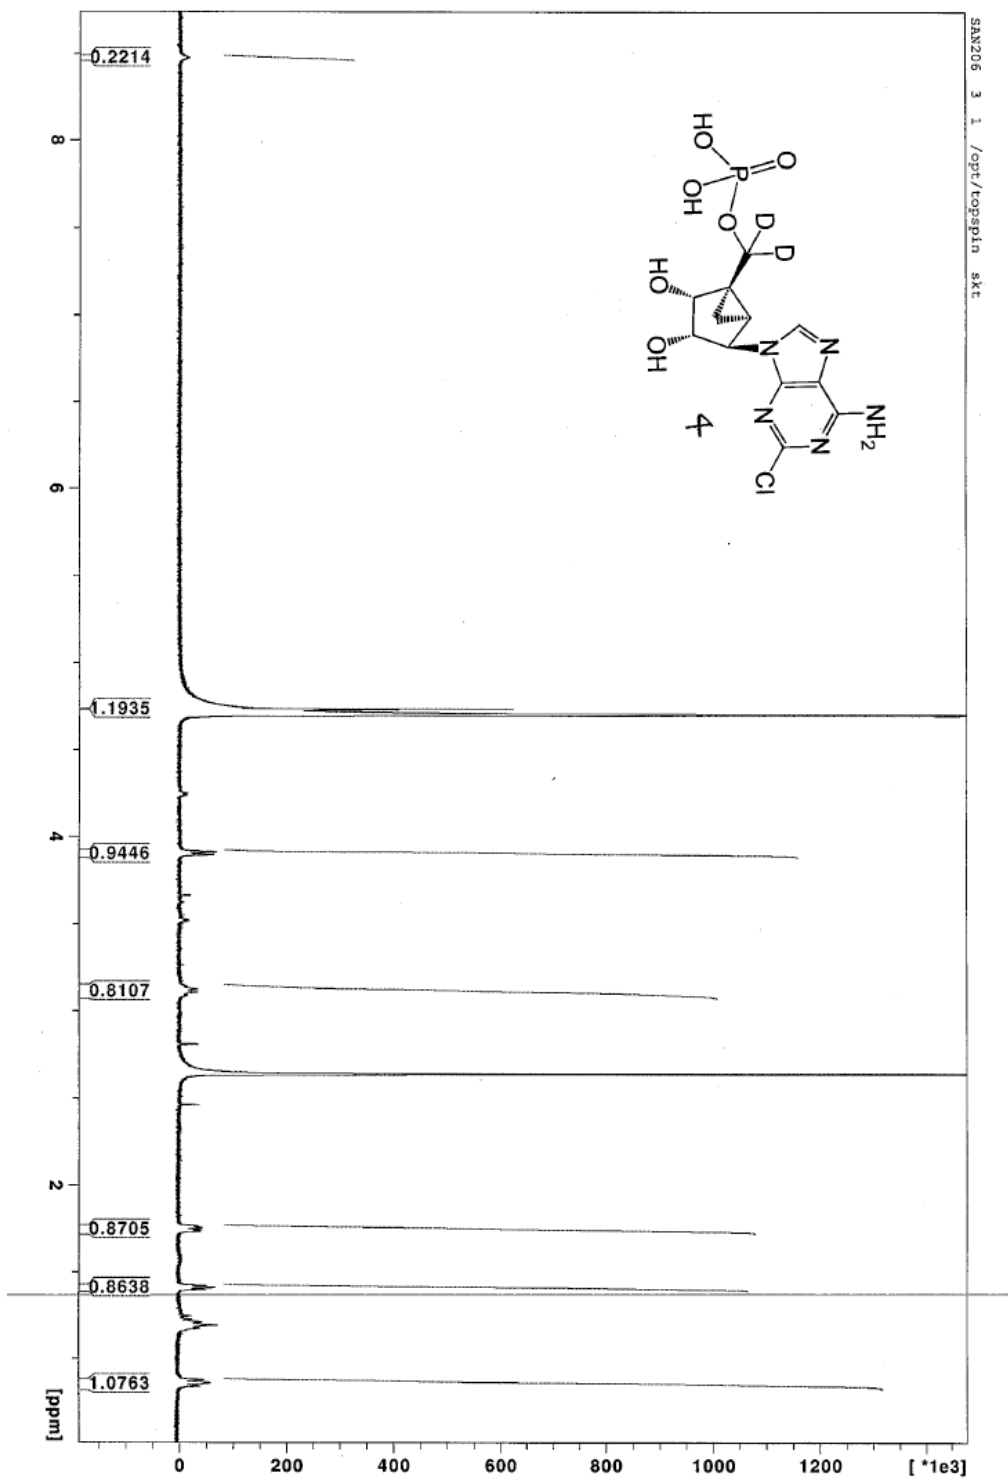

## Compound 4, HPLC

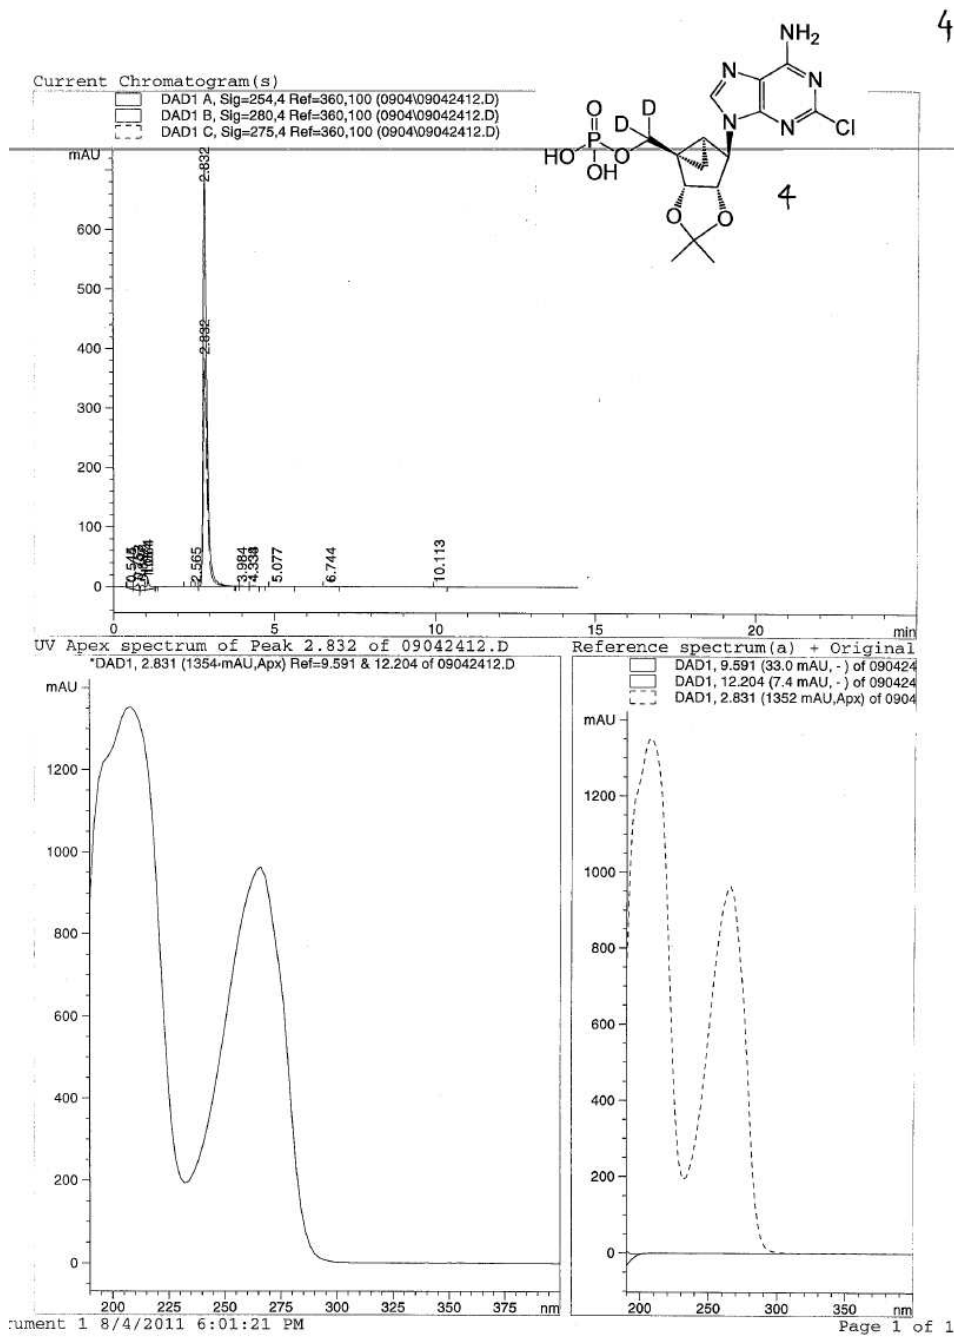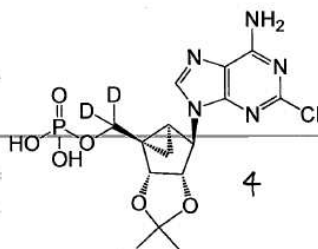

Compound 4,  $^{31}\text{P}$  NMR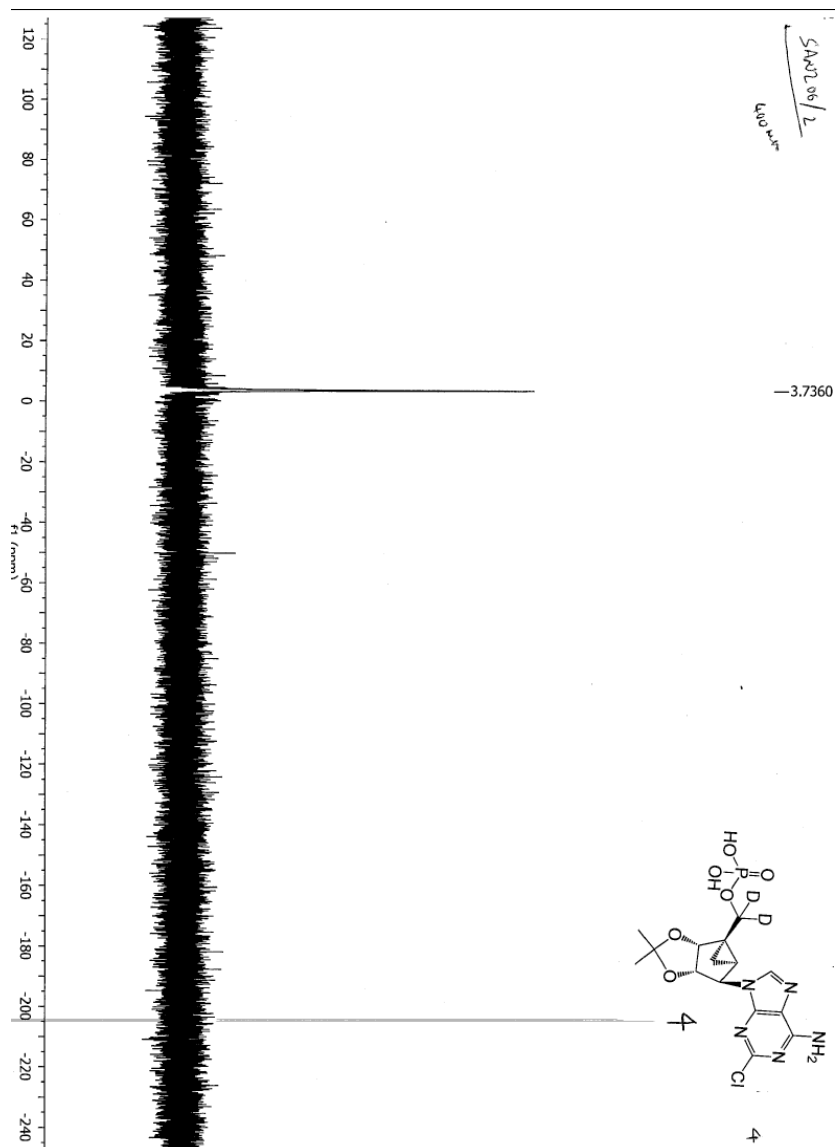

Compound 5,  $^1\text{H}$  NMR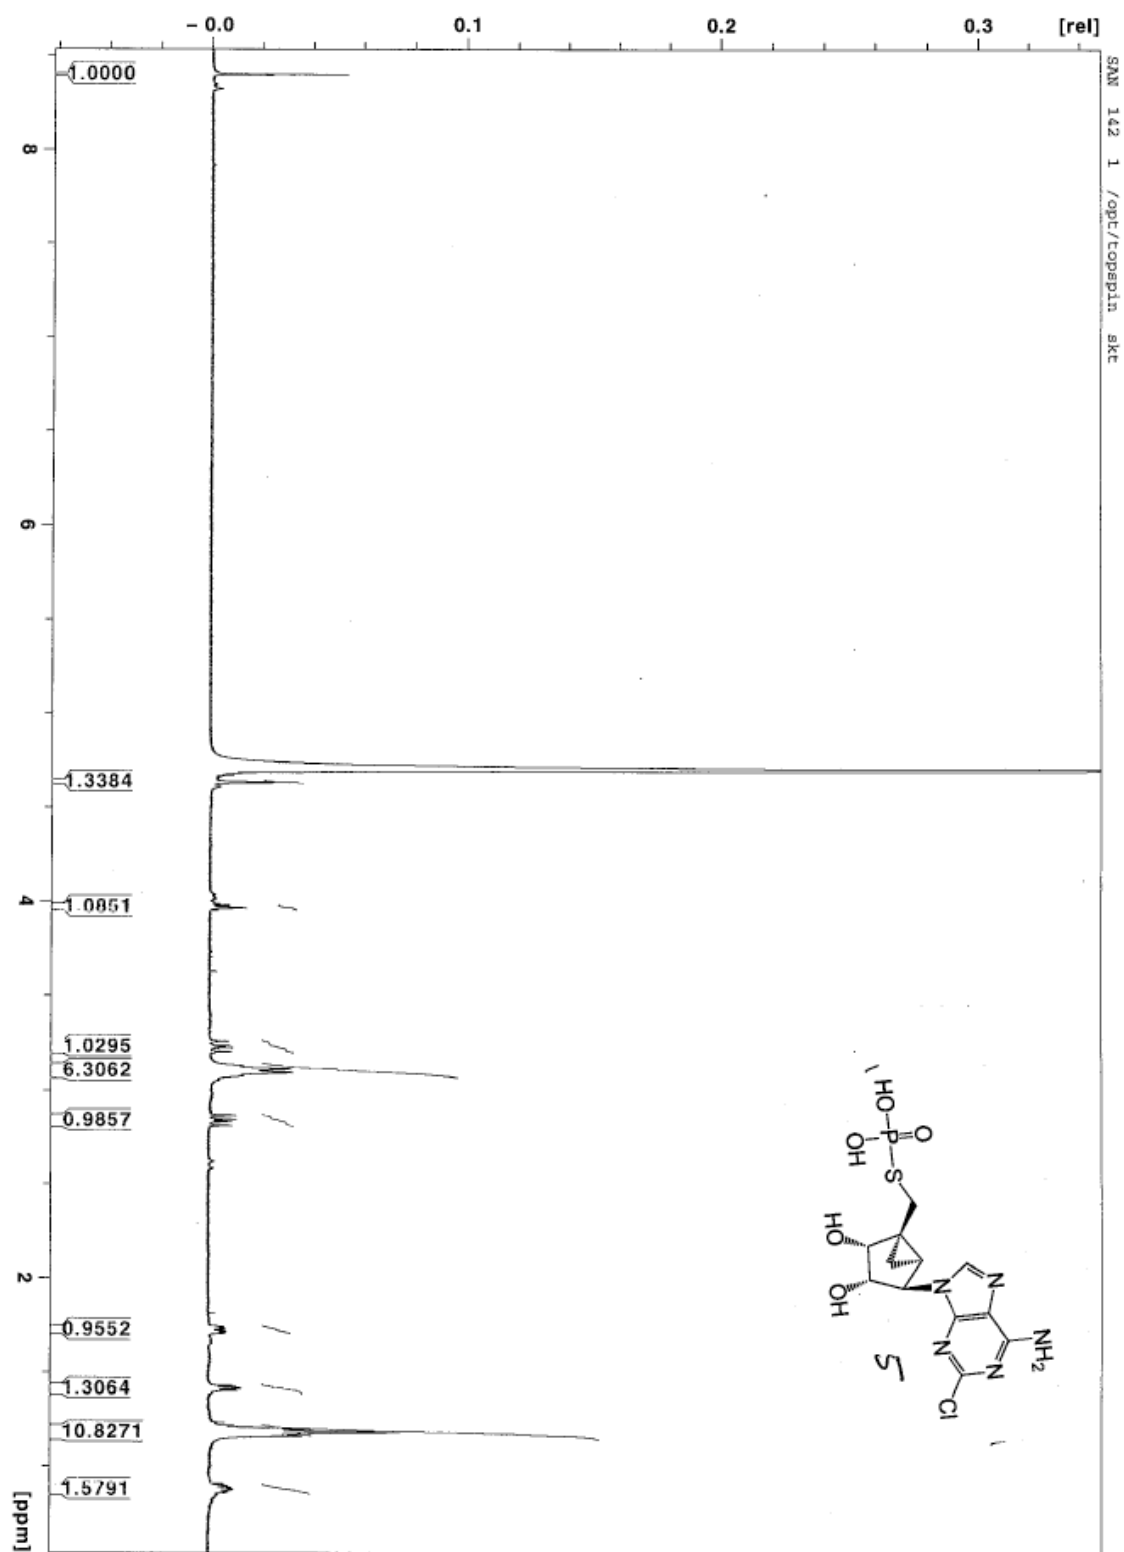

Compound 6,  $^1\text{H}$  NMR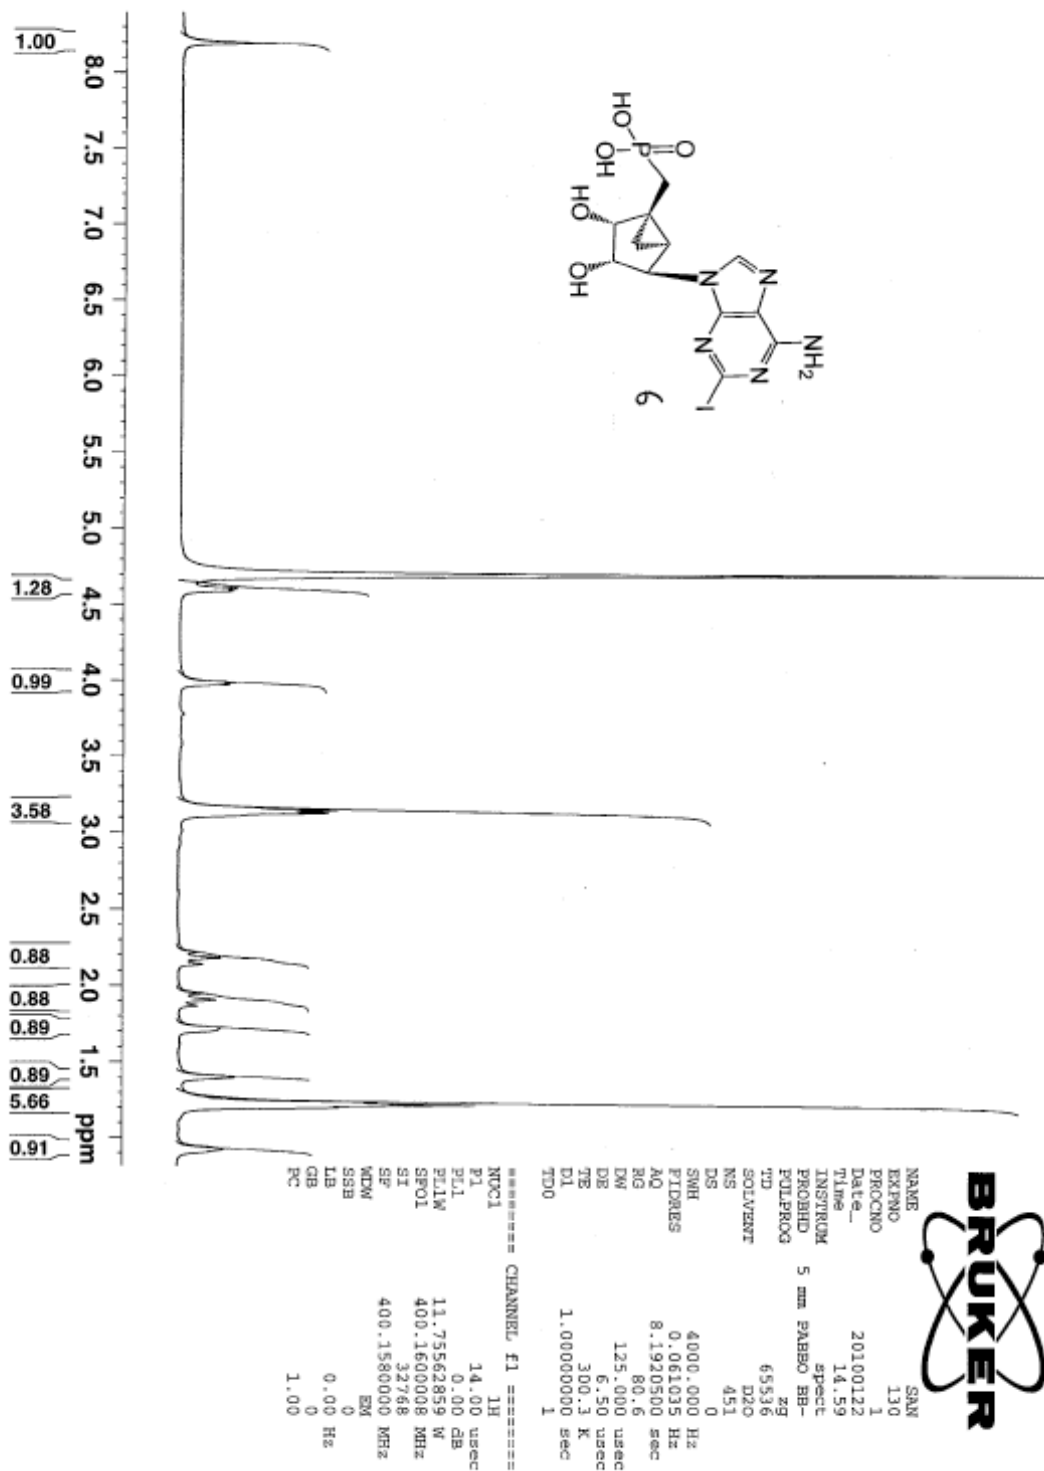

Compound 6,  $^{31}\text{P}$  NMR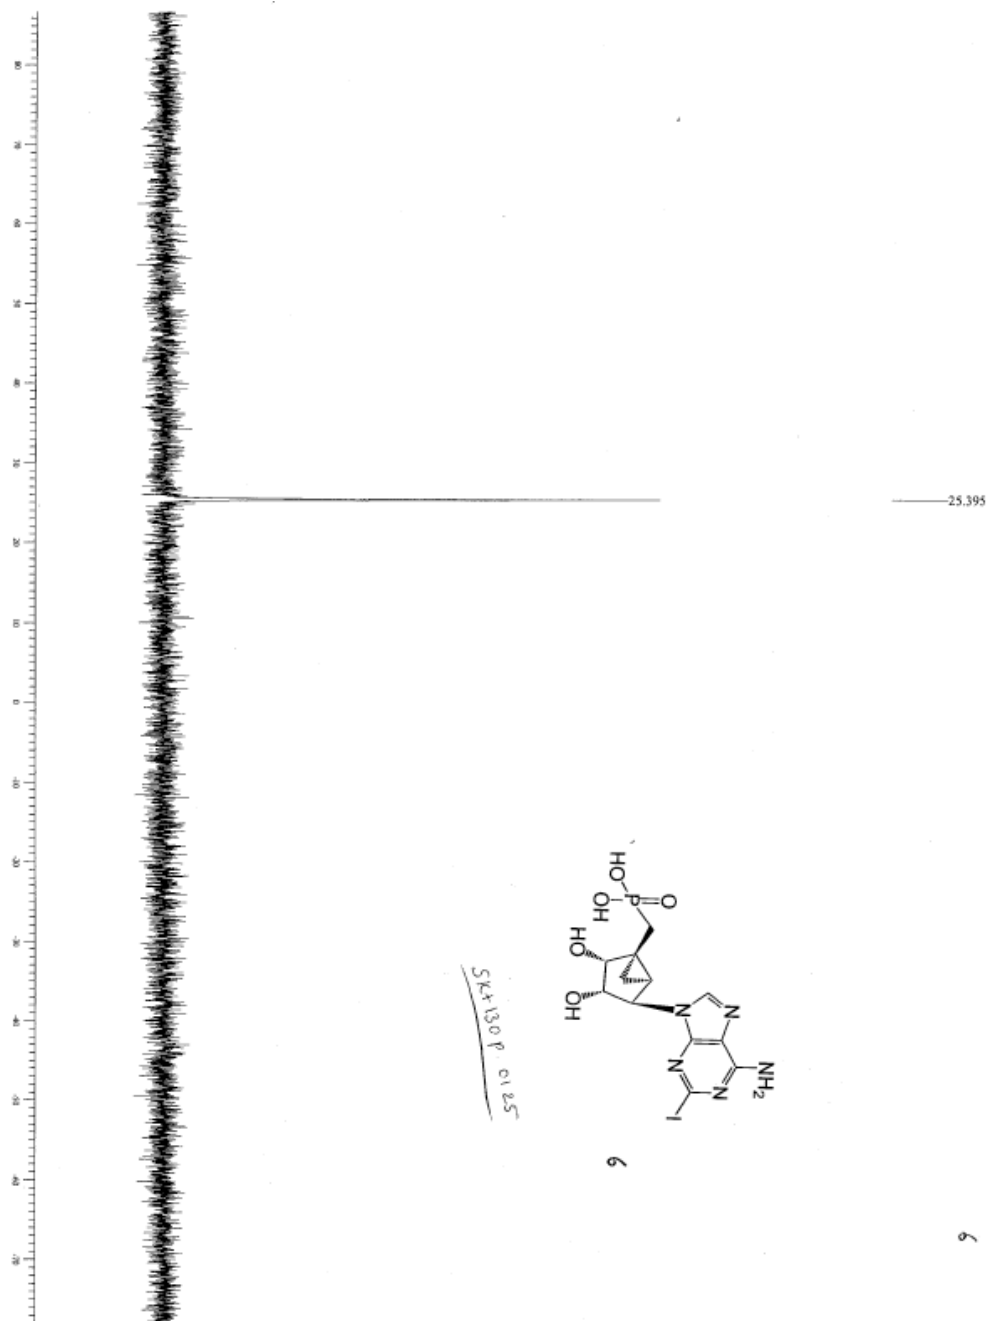

## Compound 6, HPLC

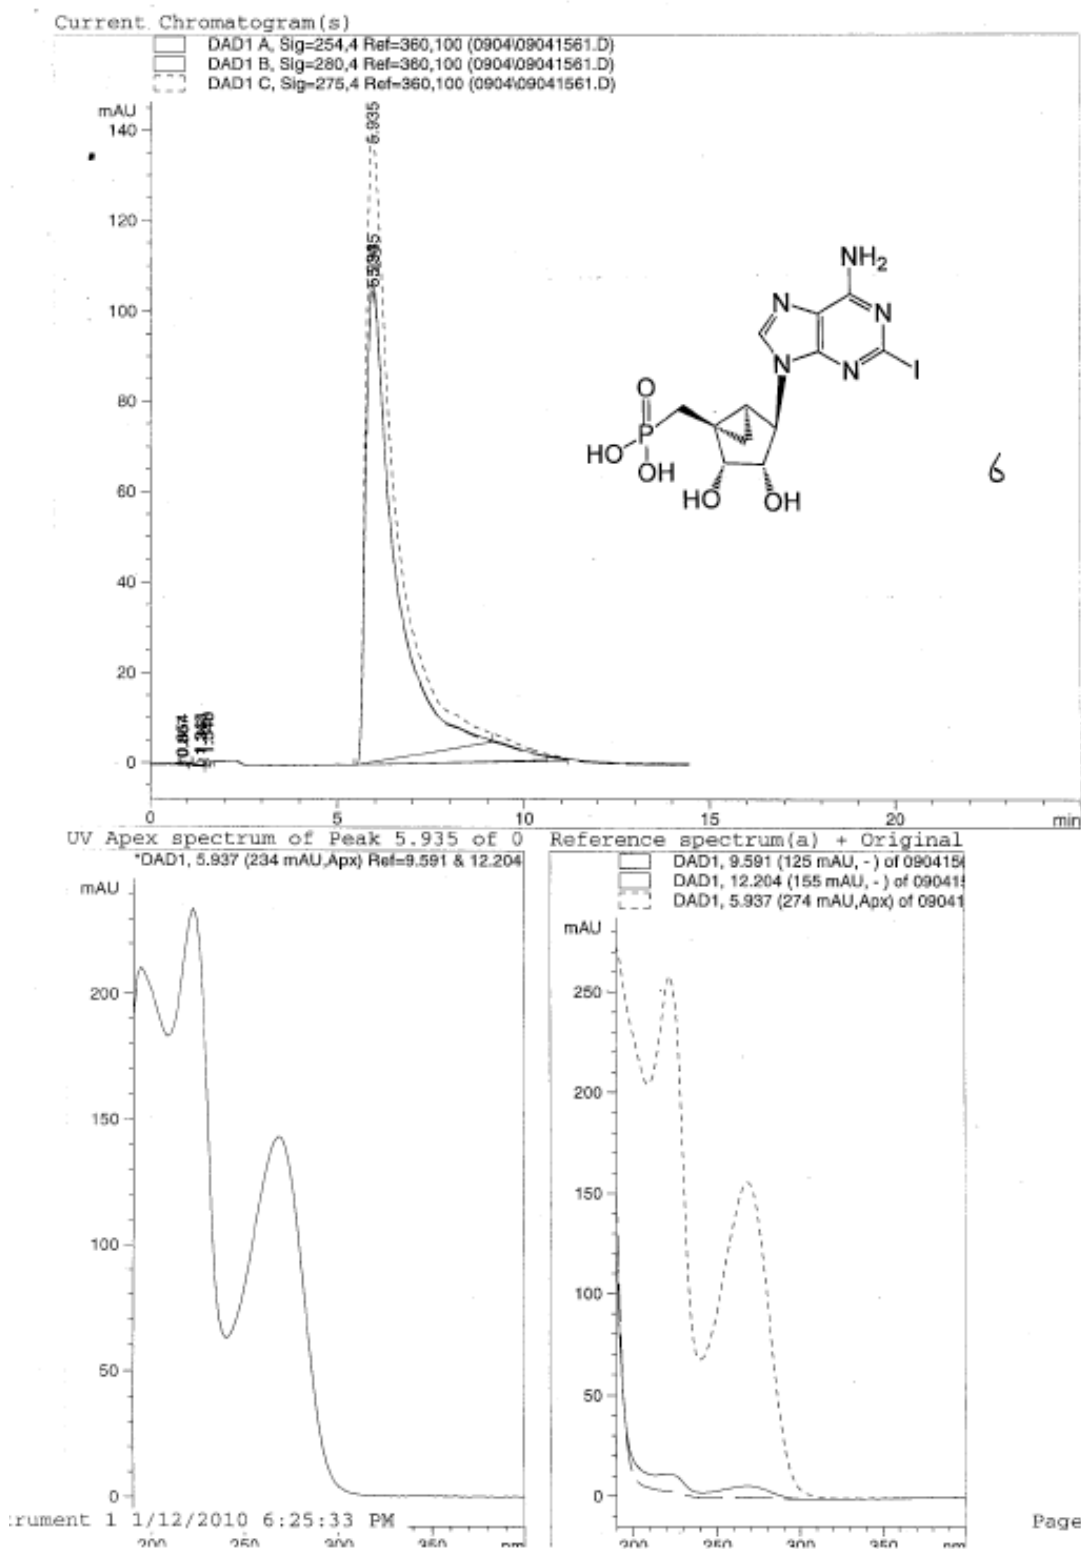



Compound 7,  $^{31}\text{P}$  NMR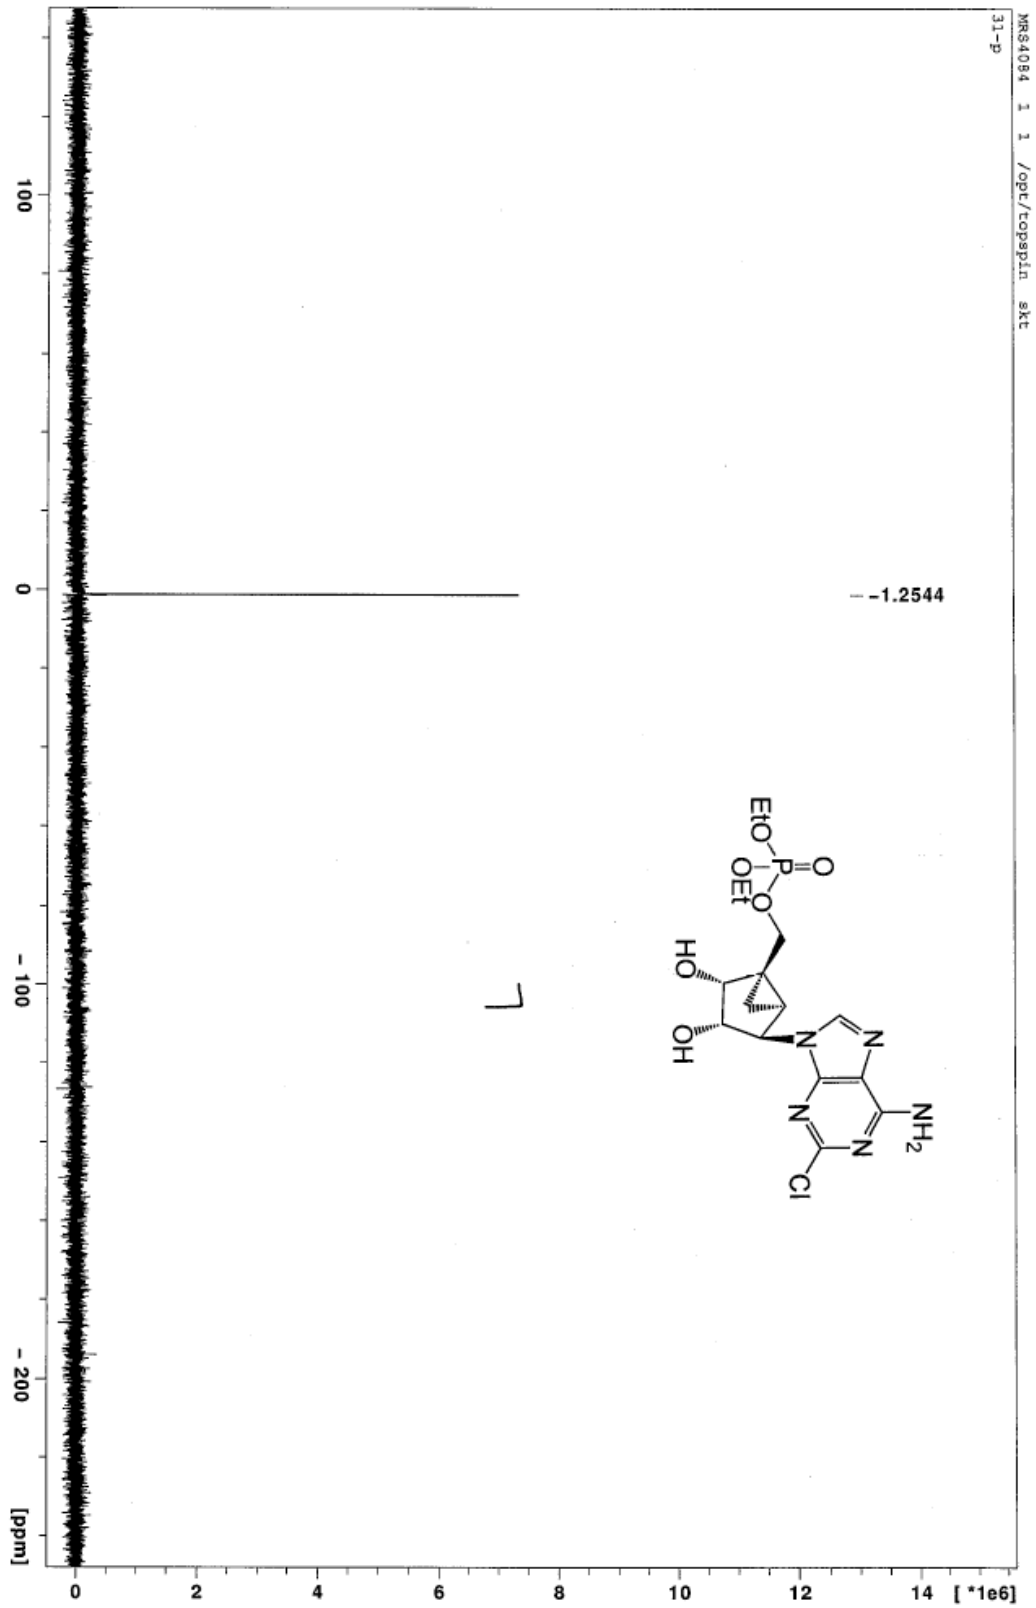

Compound 7,  $^1\text{H}$  NMR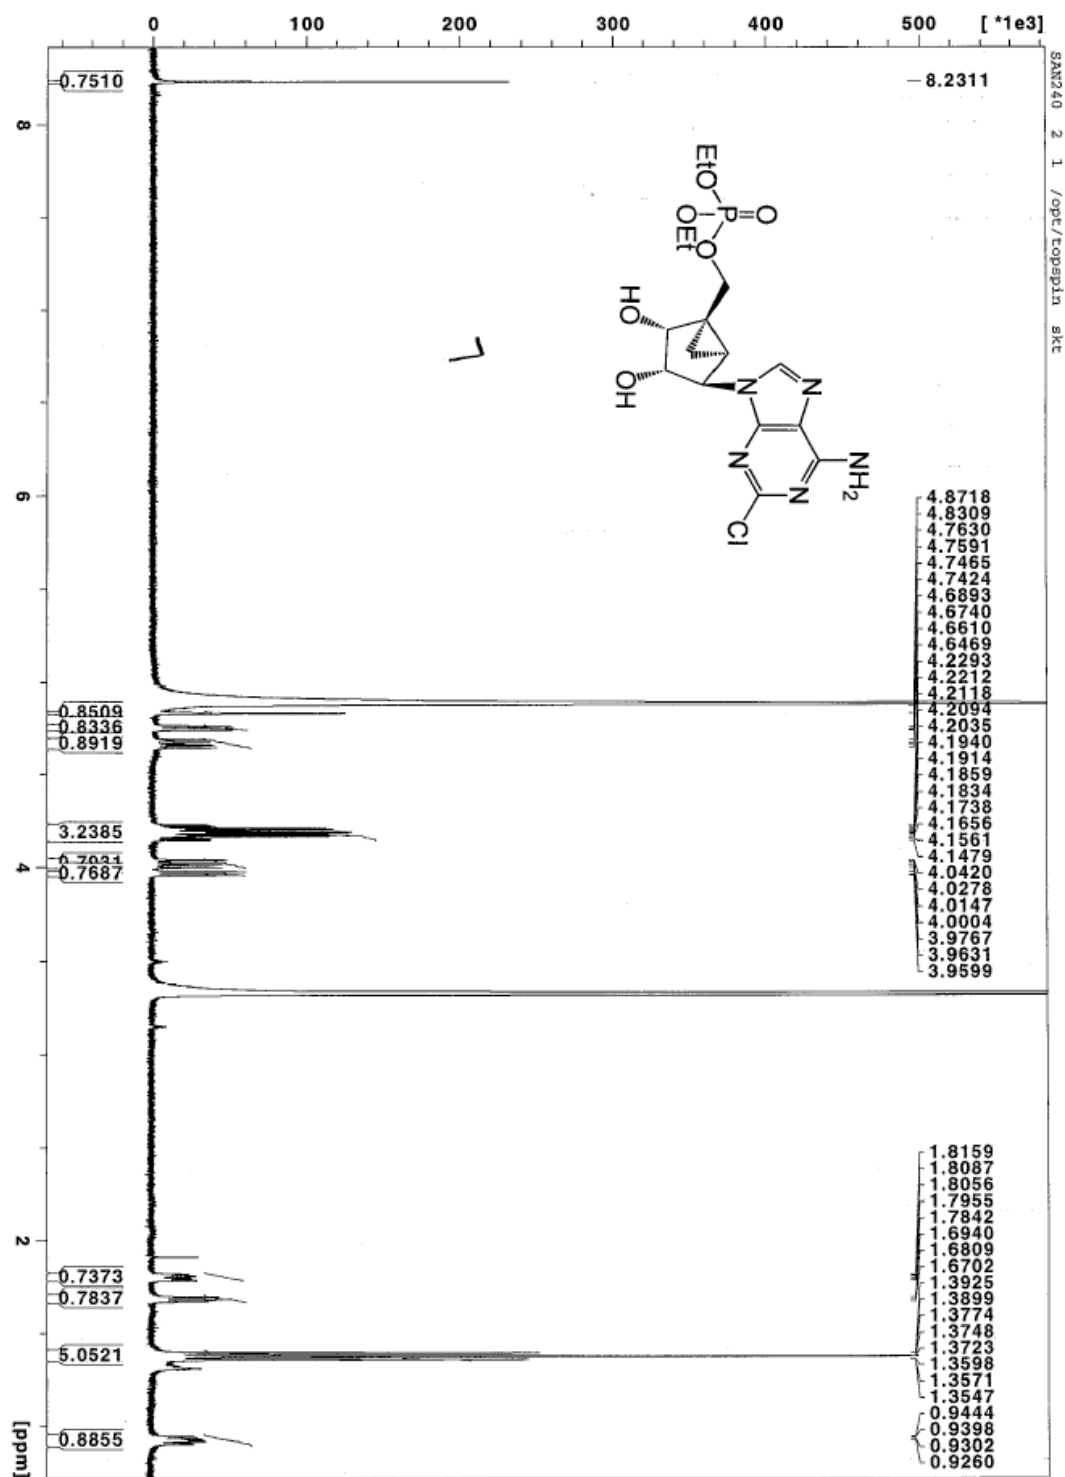

## Compound 7, HPLC

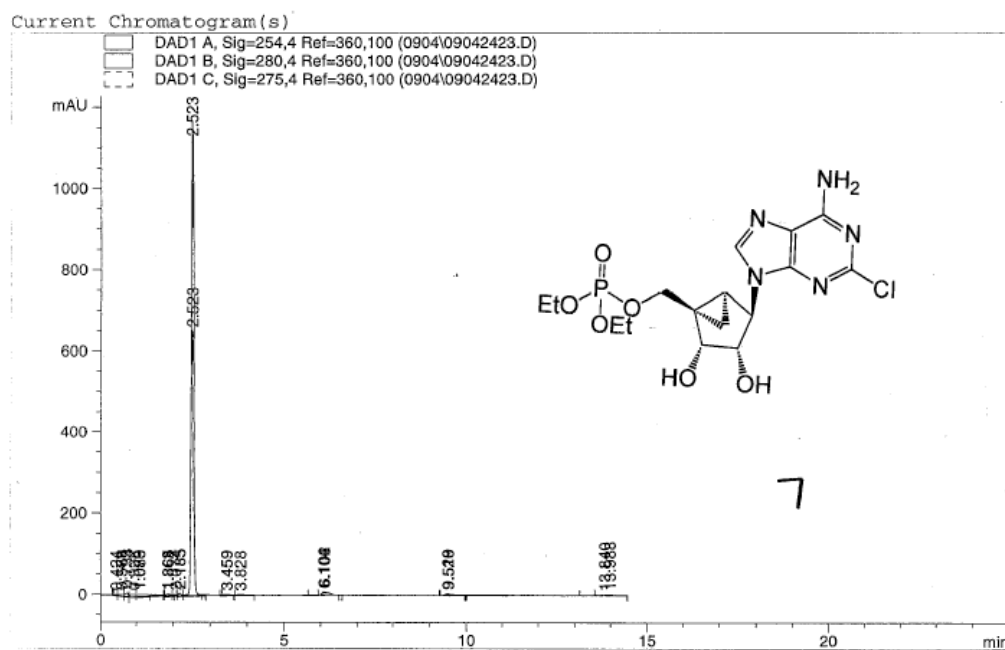

UV Apex spectrum of Peak 2.523 of 09042423.D

\*DAD1, 2.521 (1863 mAU, -) Ref=9.595 & 12.208 of 09042423.D

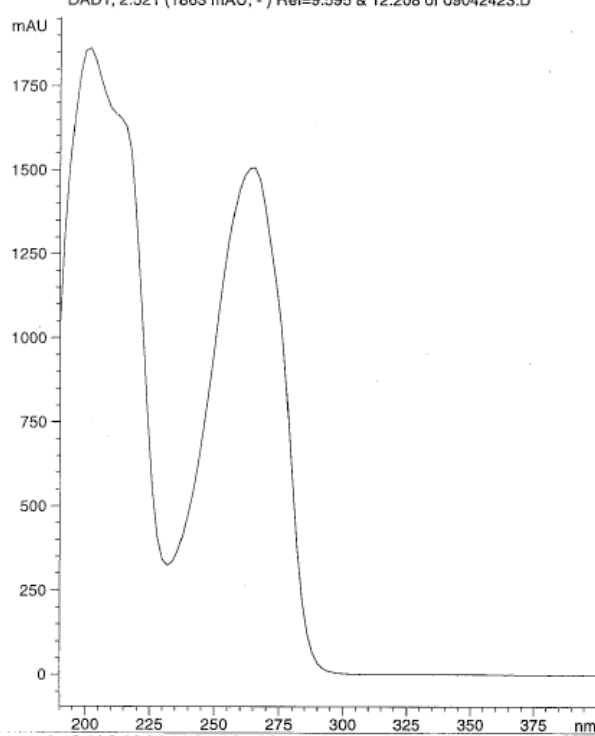

Reference spectrum(a) + Original

DAD1, 9.595 (160 mAU, Dn2) of 09042  
 DAD1, 12.208 (188 mAU, -) of 09042  
 DAD1, 2.521 (1901 mAU, -) of 09042

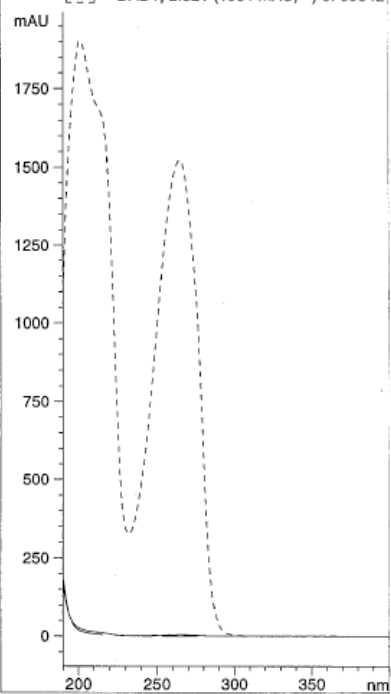

Compound 8,  $^1\text{H}$  NMR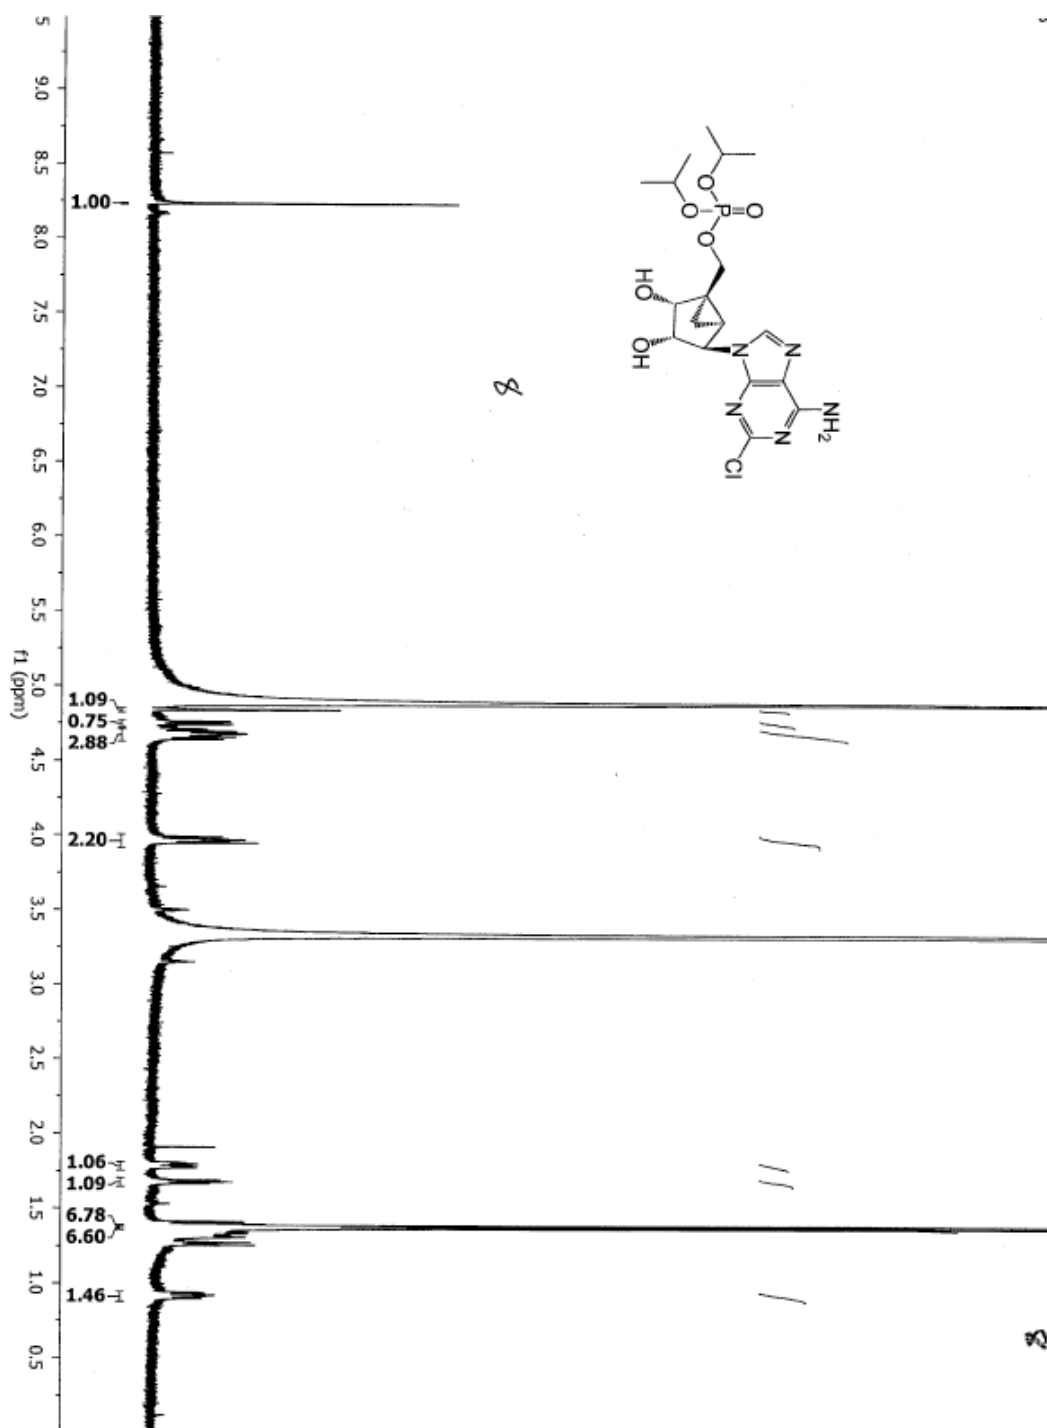

Compound **8**,  $^{31}\text{P}$  NMR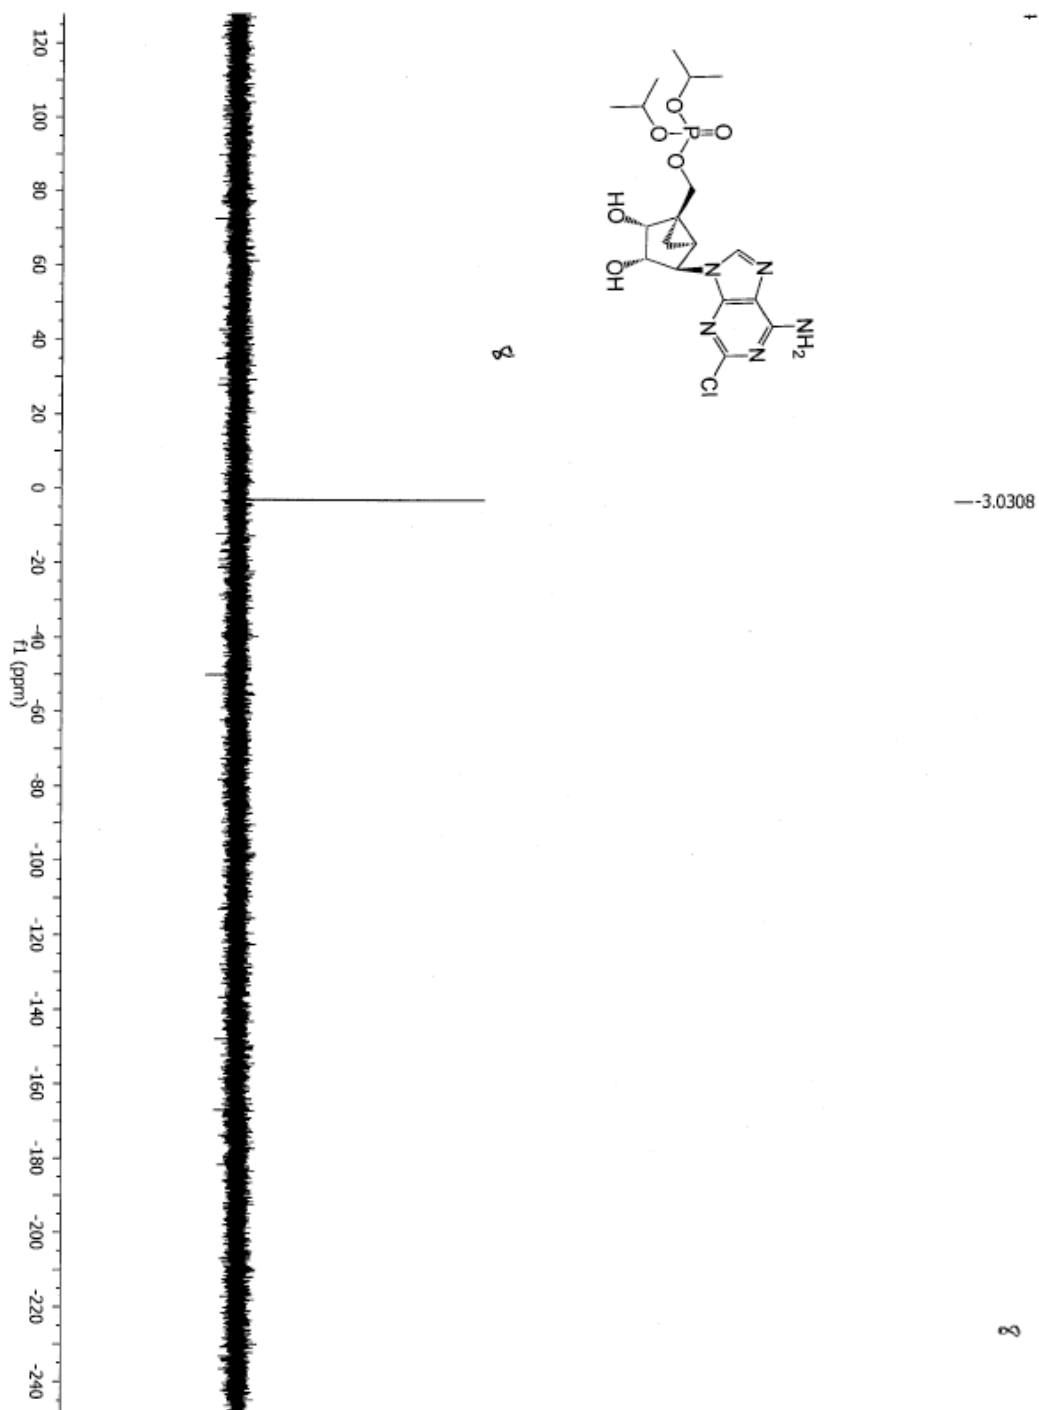

## Compound 8, HPLC

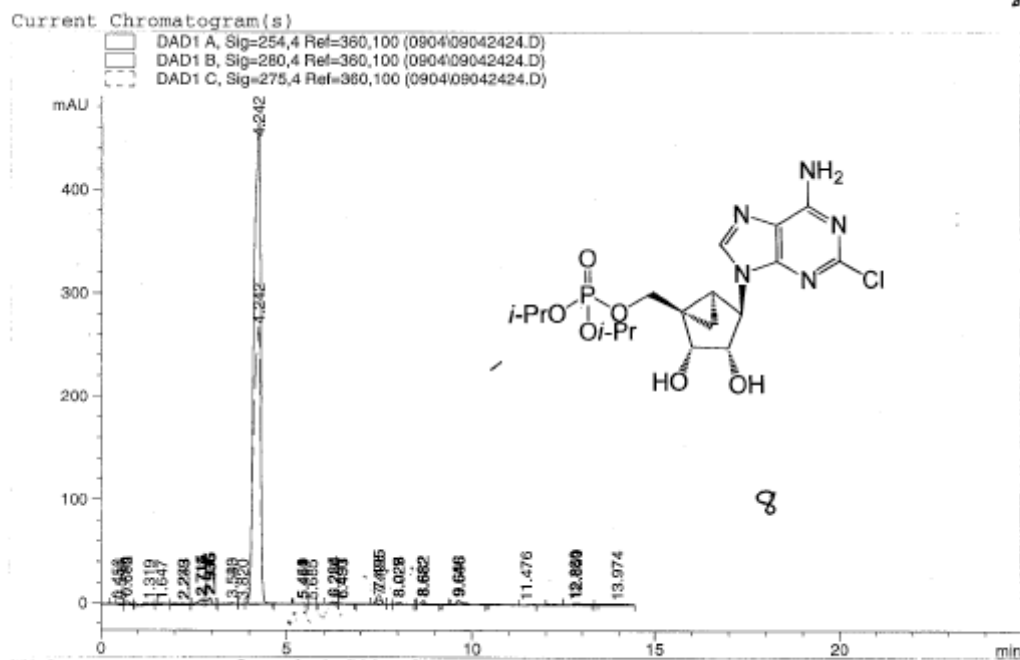

UV Apex spectrum of Peak 2.523 of 09042423.D

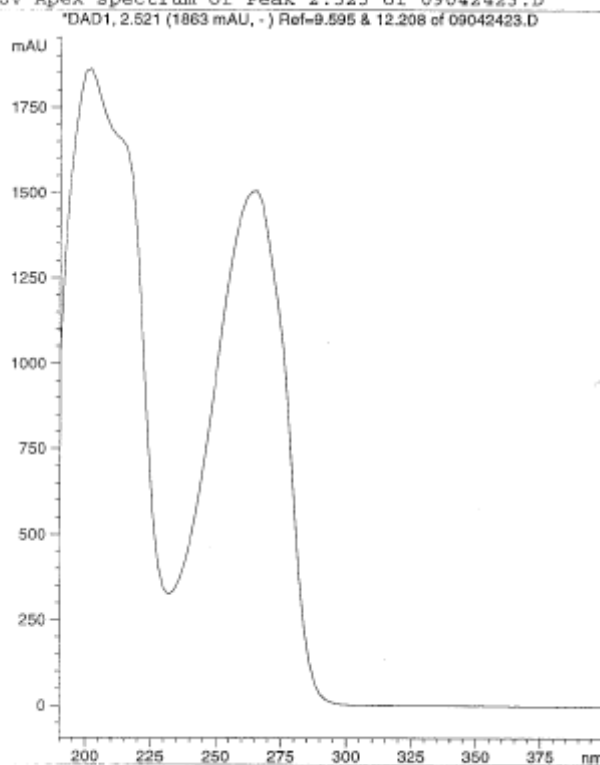

Reference spectrum(a) + Original

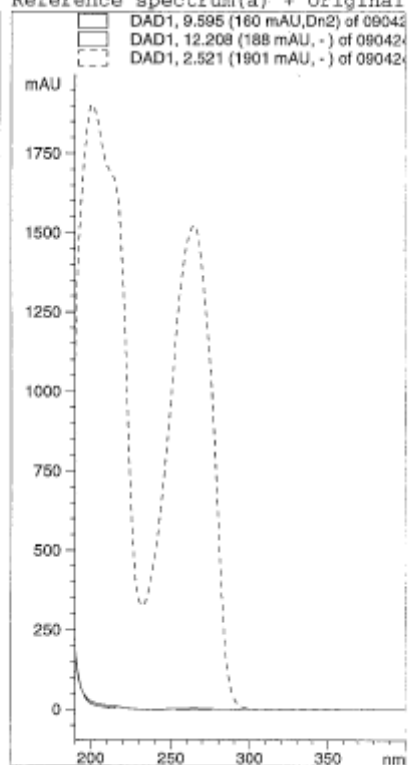

Compound 9,  $^1\text{H}$  NMR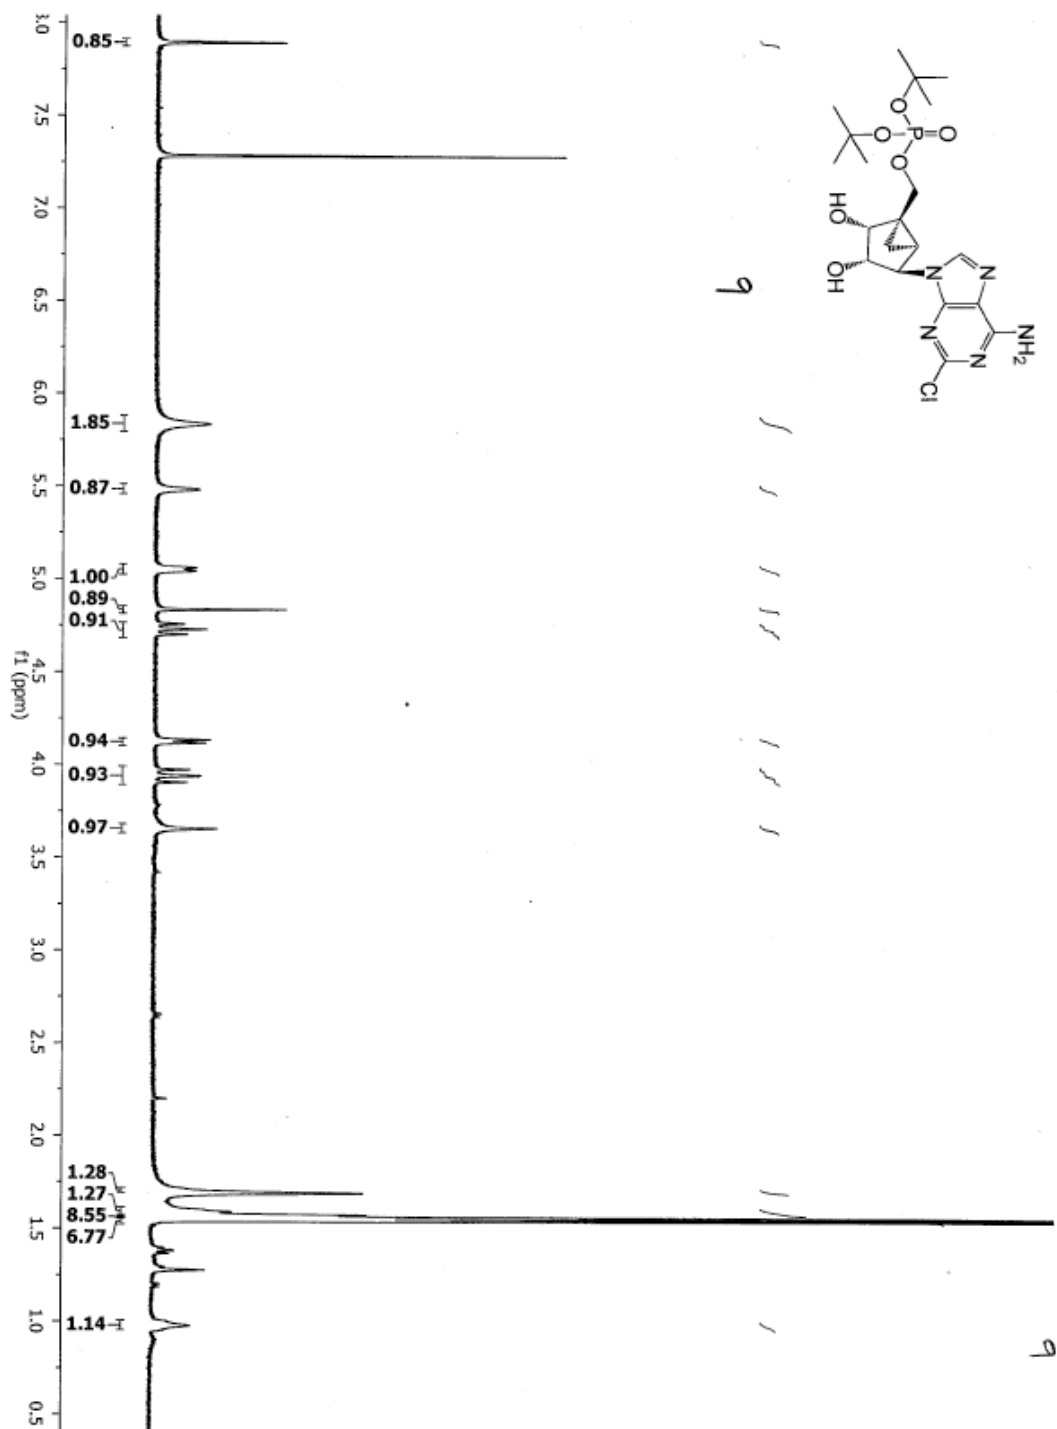

Compound 9,  $^{31}\text{P}$  NMR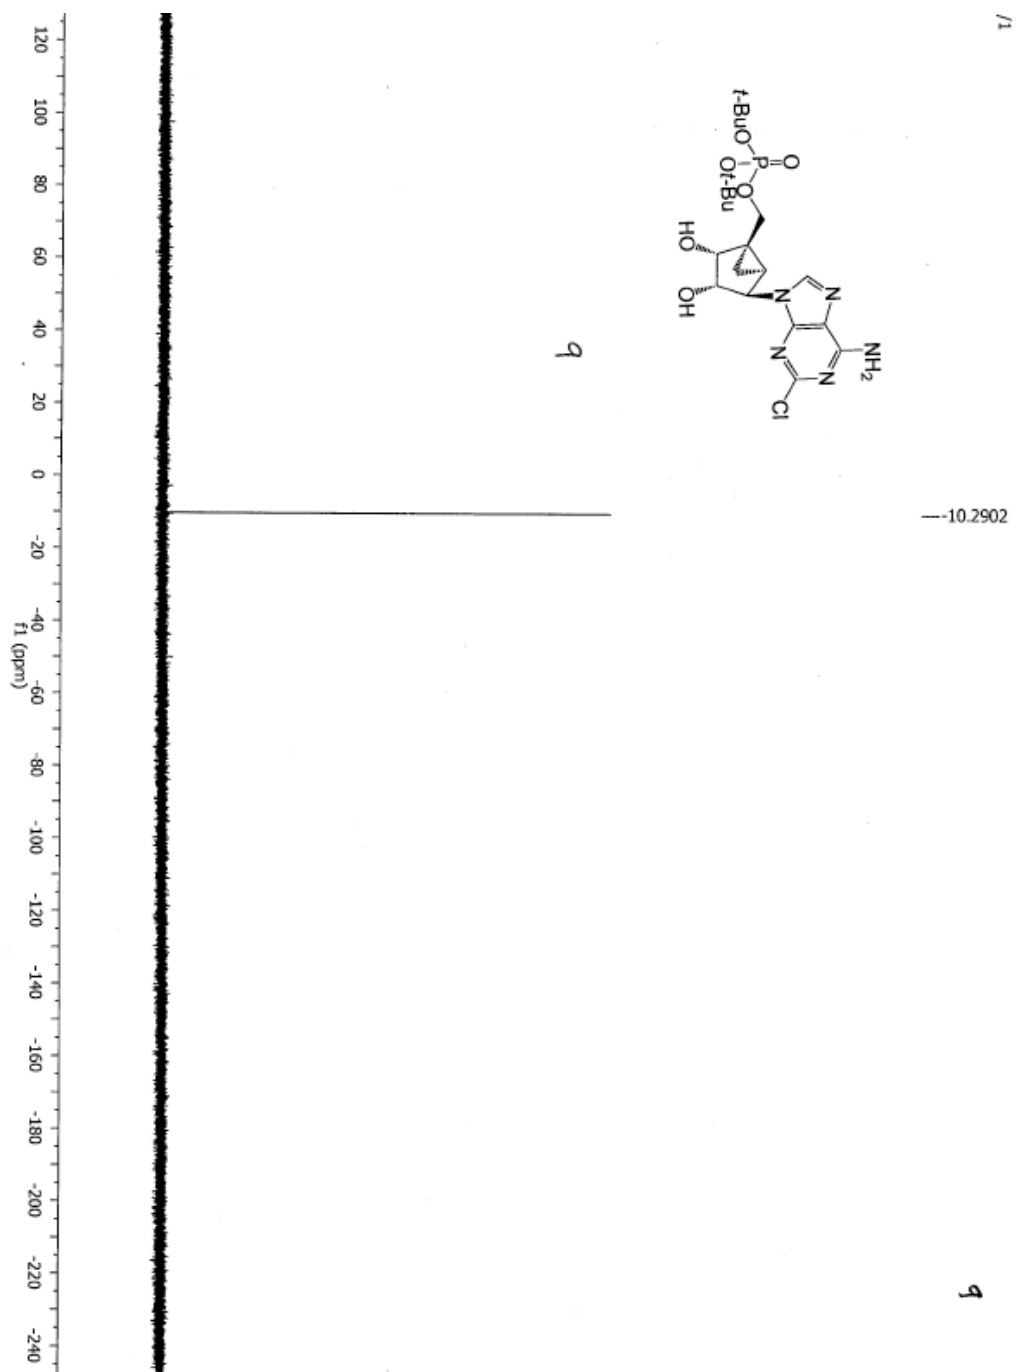



## Compound 9, HPLC

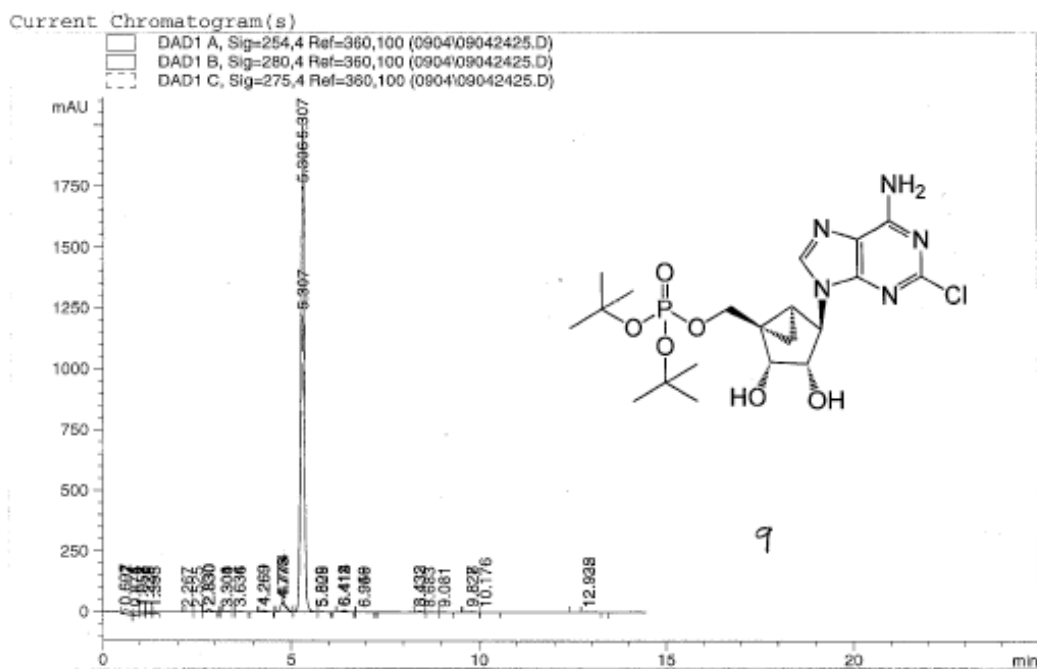

UV Apex spectrum of Peak 5.307 of 09042425.D

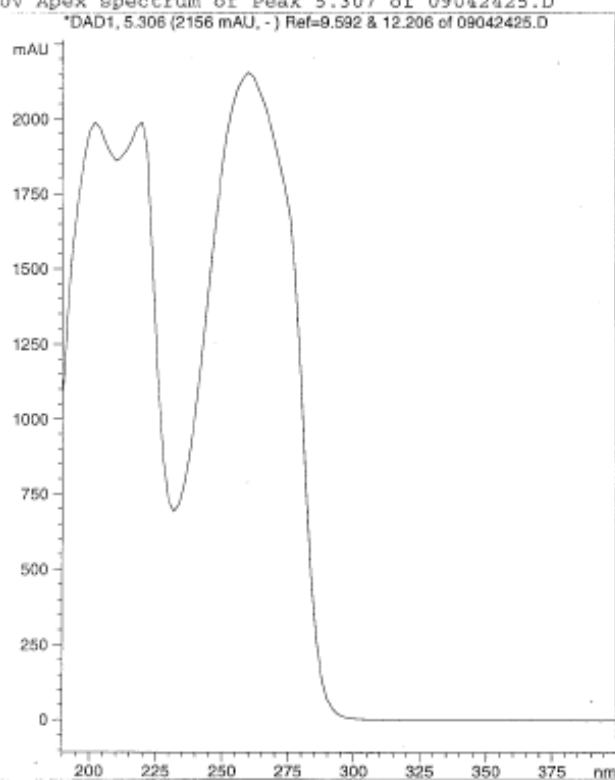

Reference spectrum(a) + Original

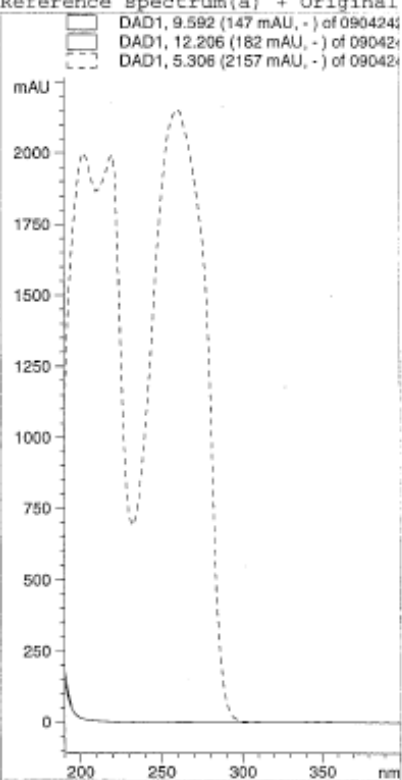

Compound 10,  $^{31}\text{P}$  NMR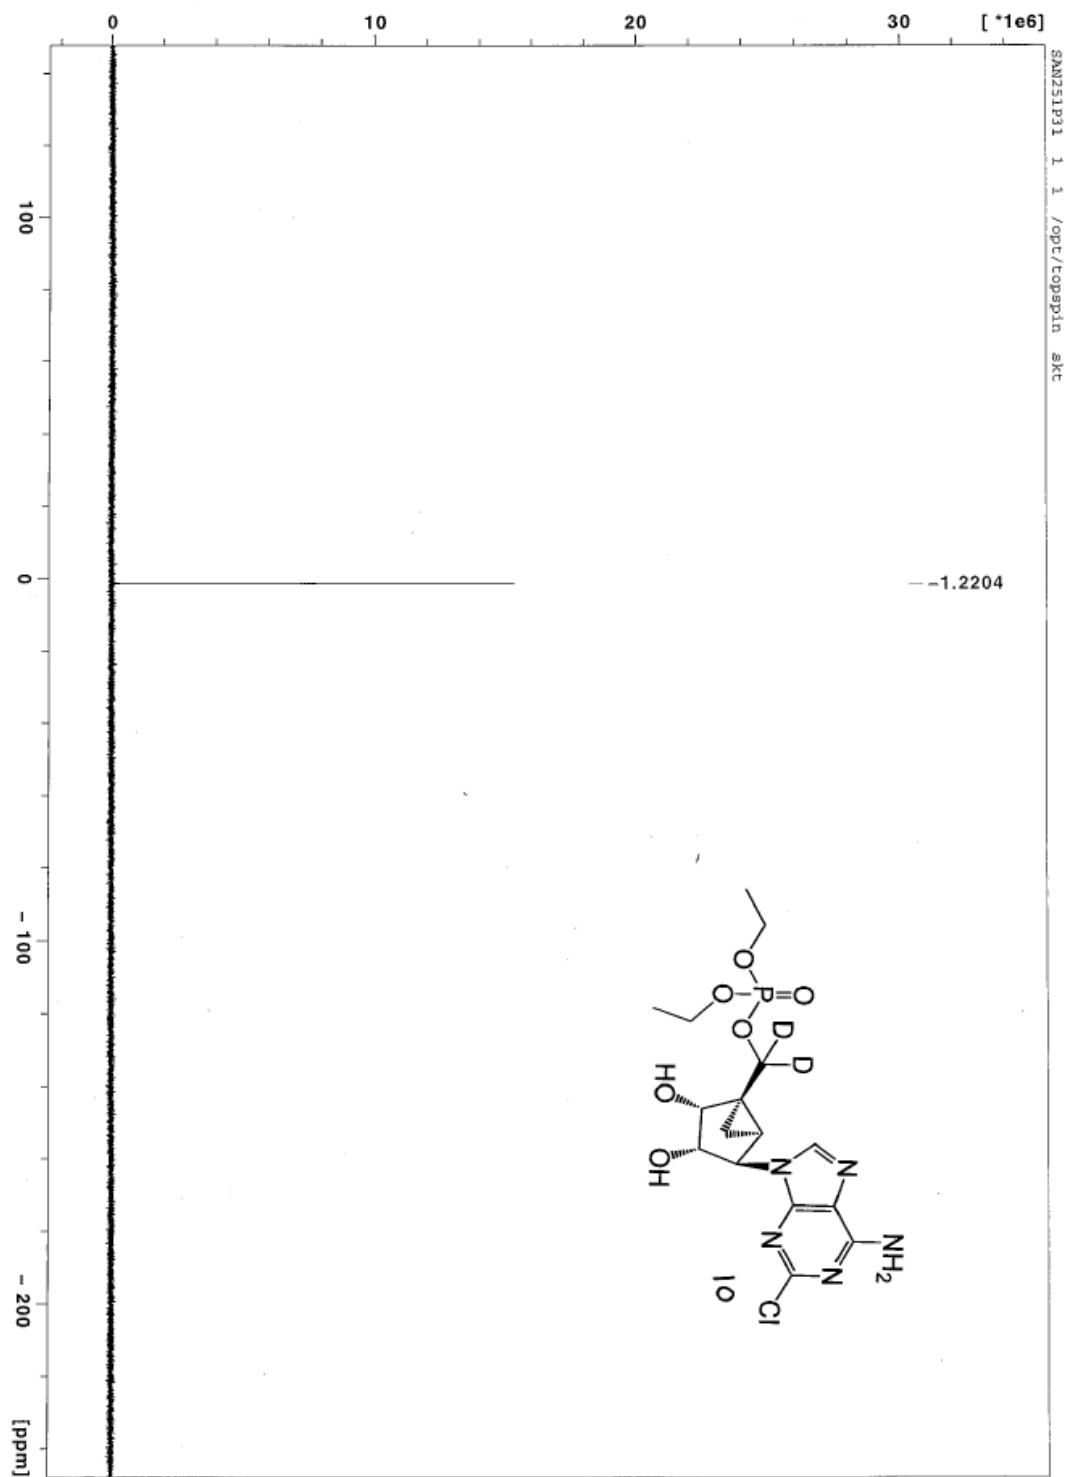

## Compound 10, HPLC

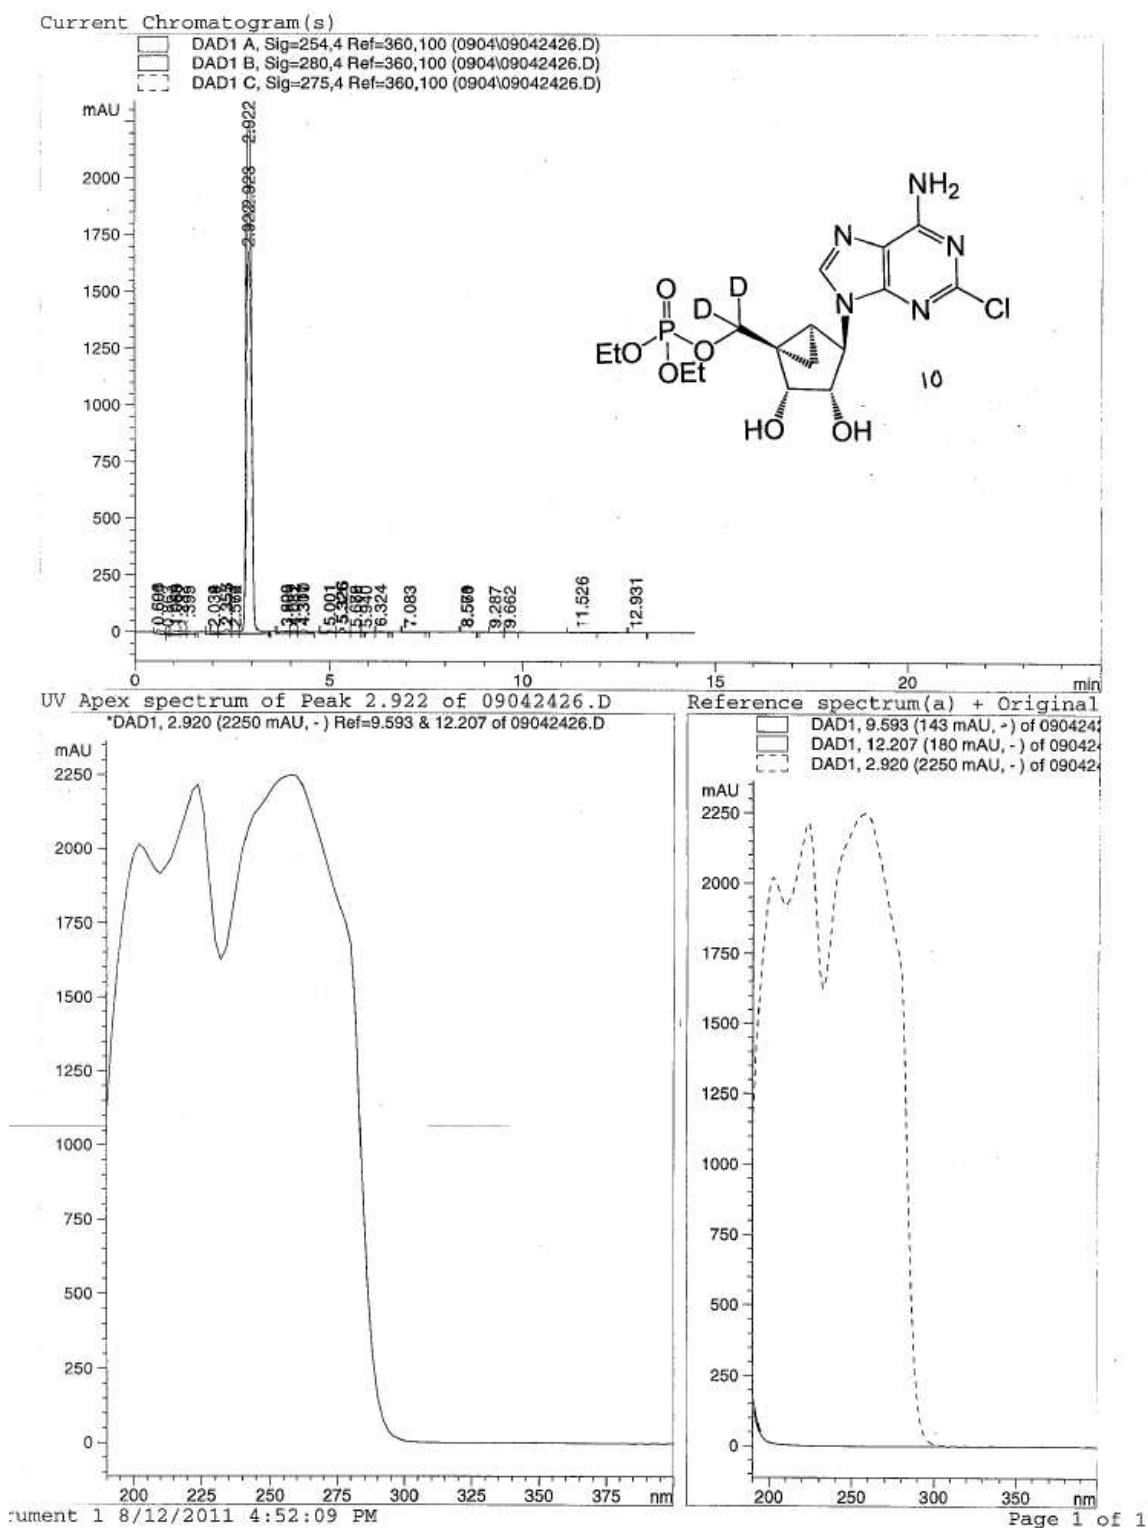

Compound 10,  $^1\text{H}$  NMR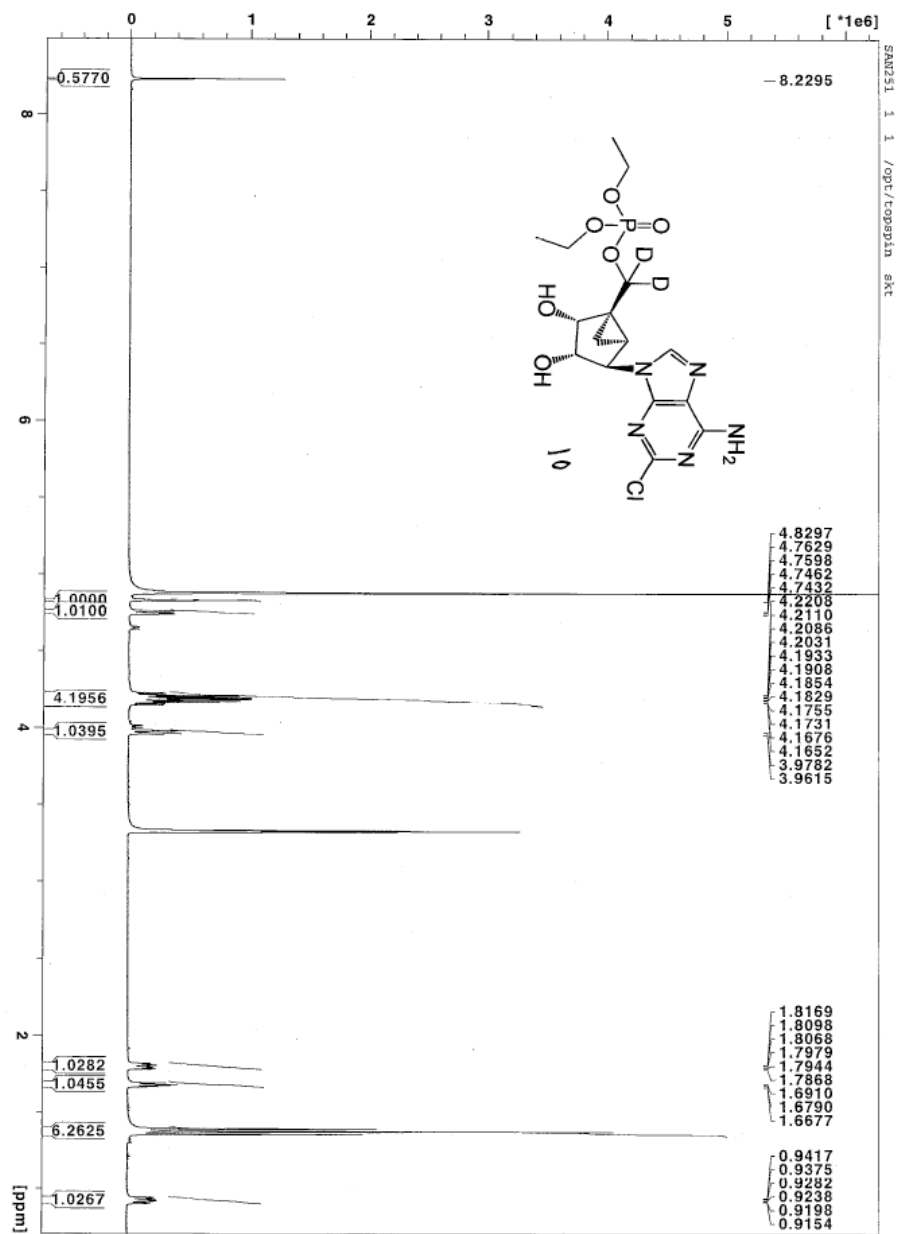

## Compound 11

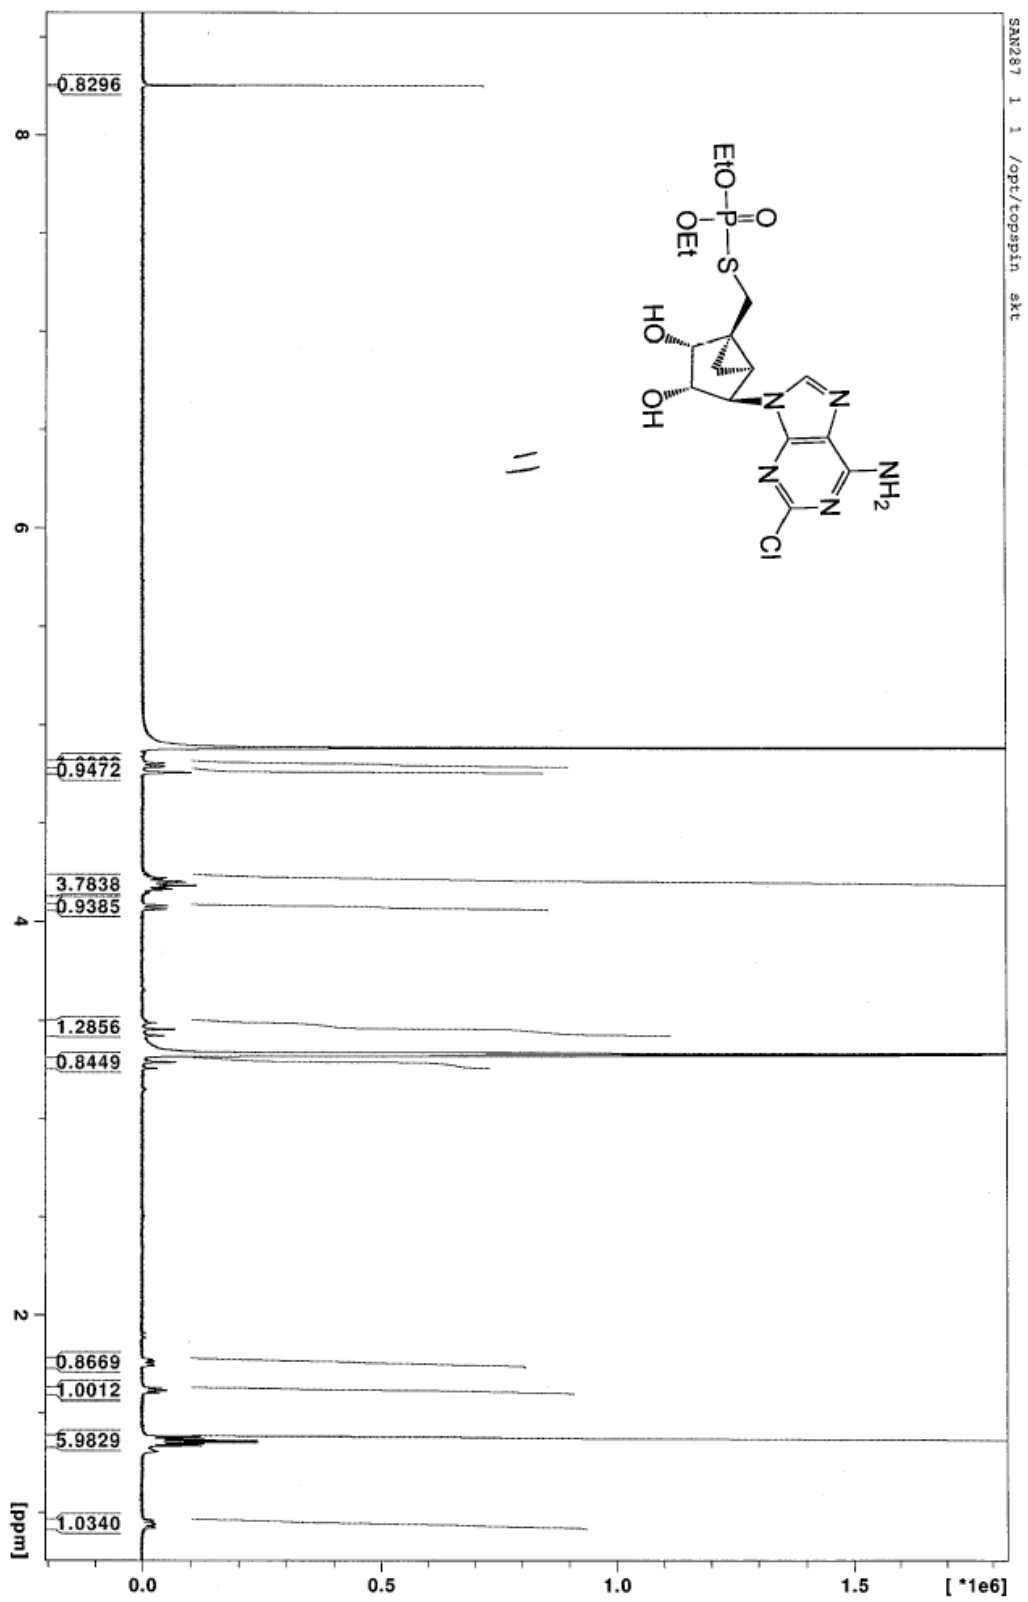

Compound 11,  $^{31}\text{P}$  NMR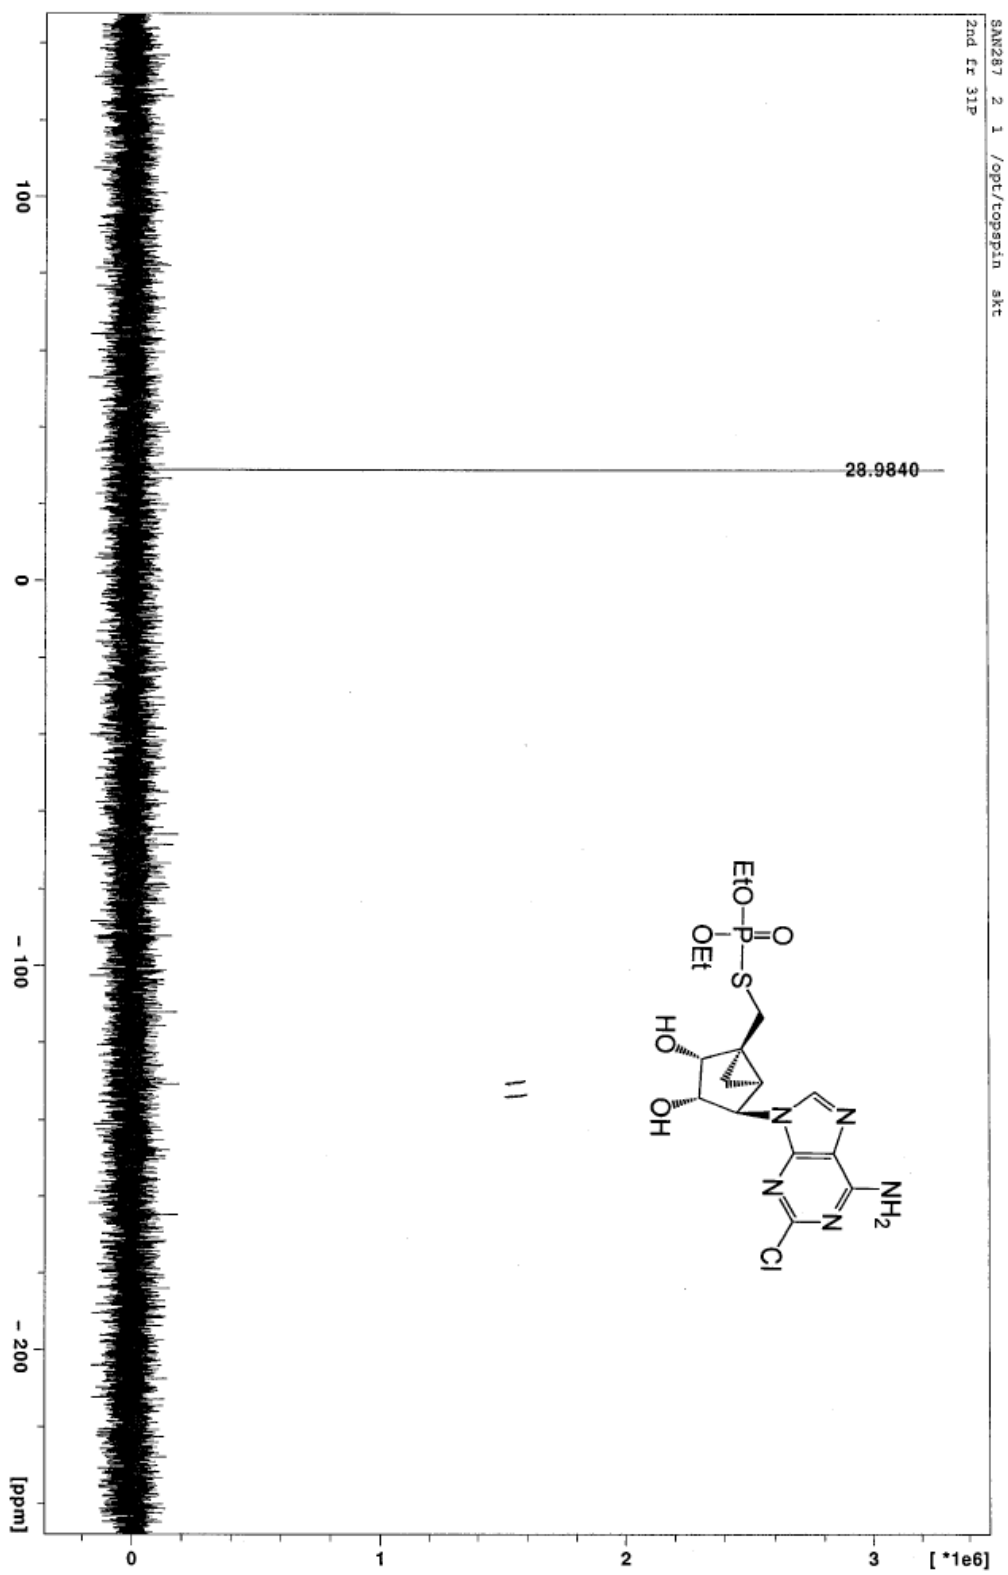

## Compound 11, HPLC

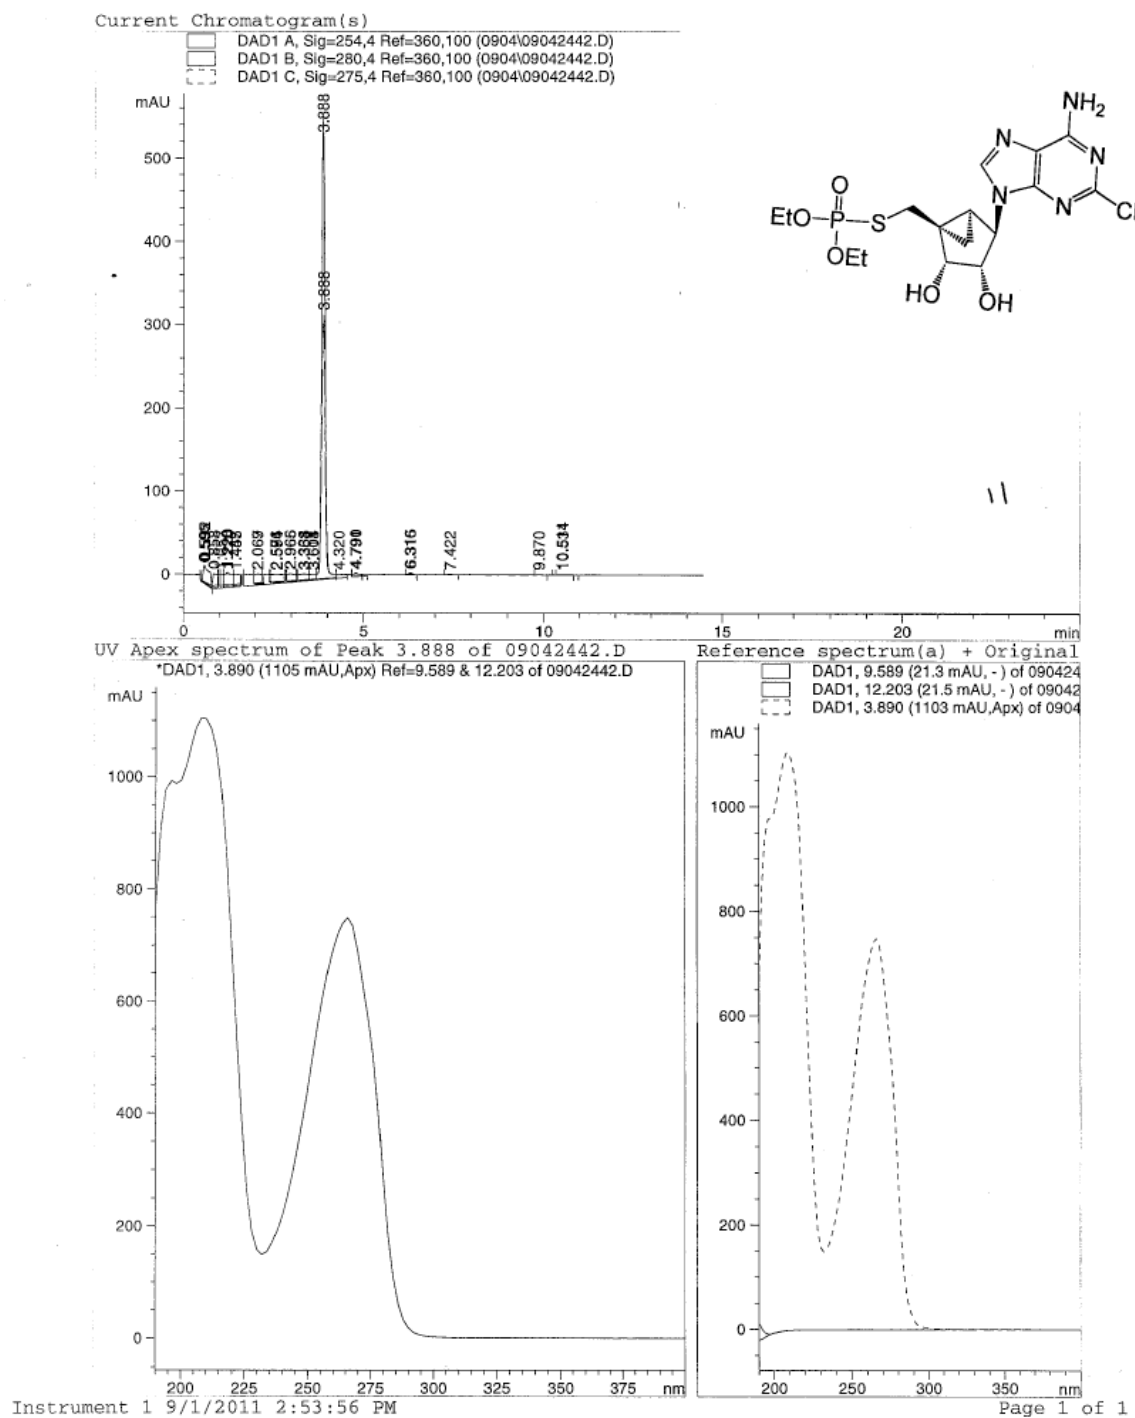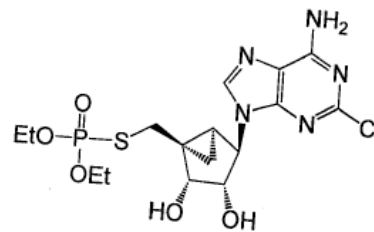





Compound 12,  $^{31}\text{P}$  NMR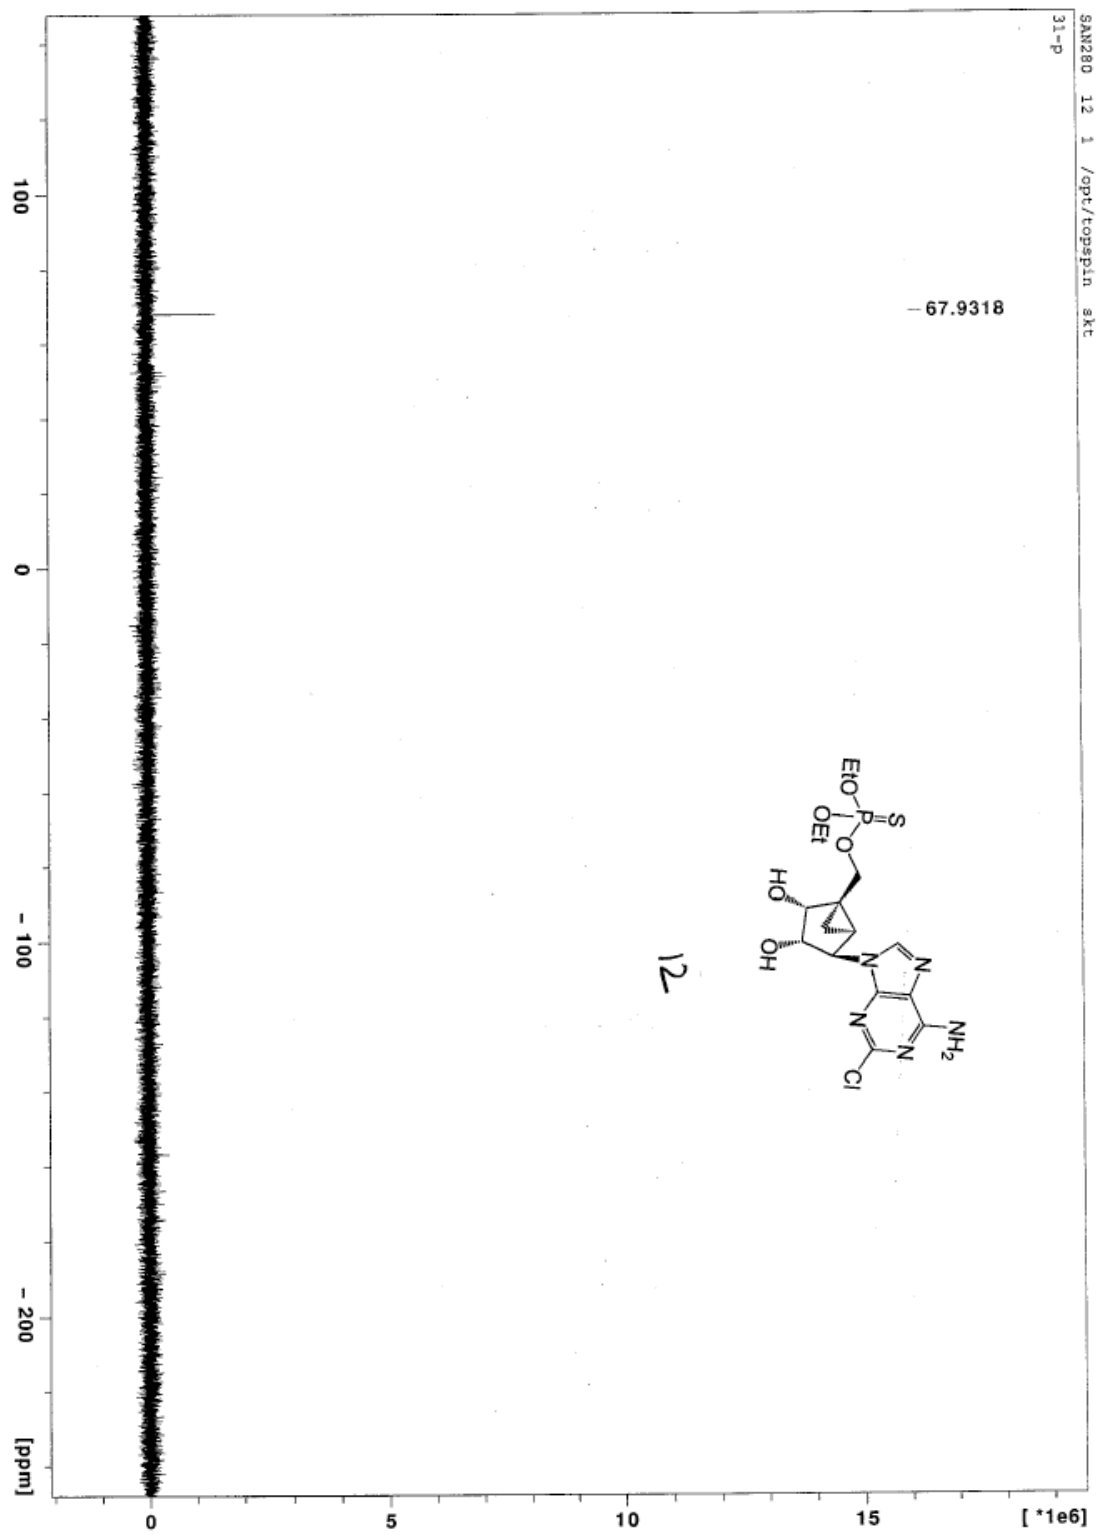

Compound 13,  $^1\text{H}$  NMR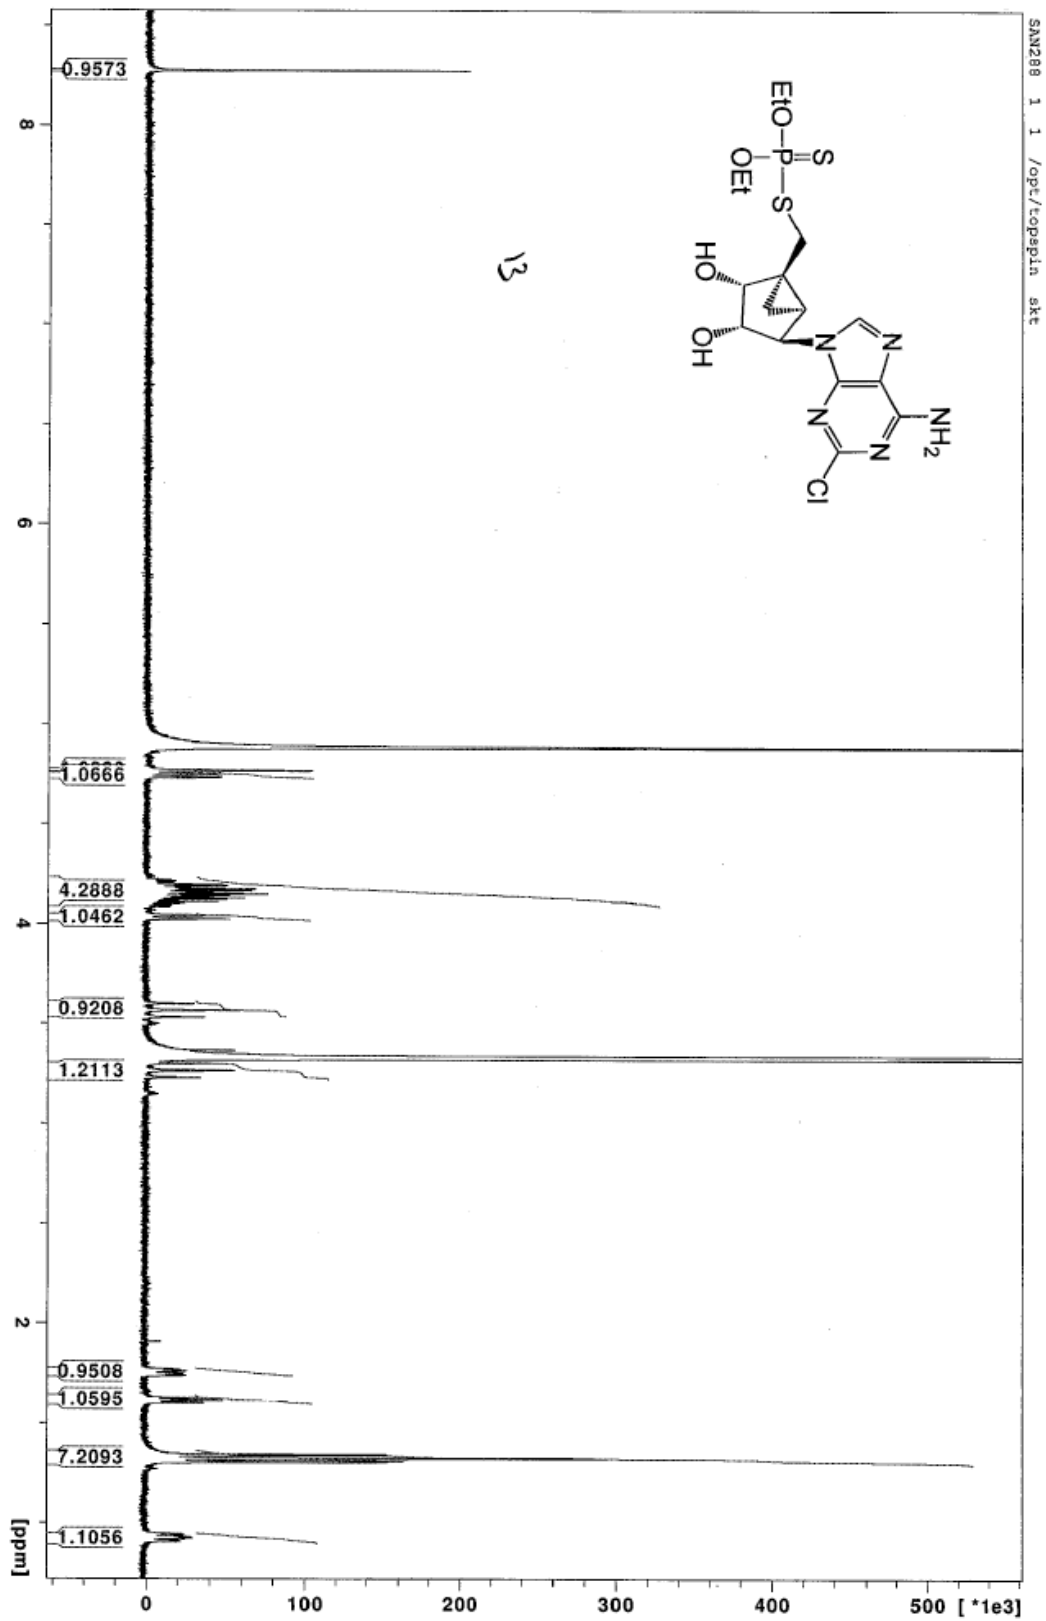

Compound 13,  $^{31}\text{P}$  NMR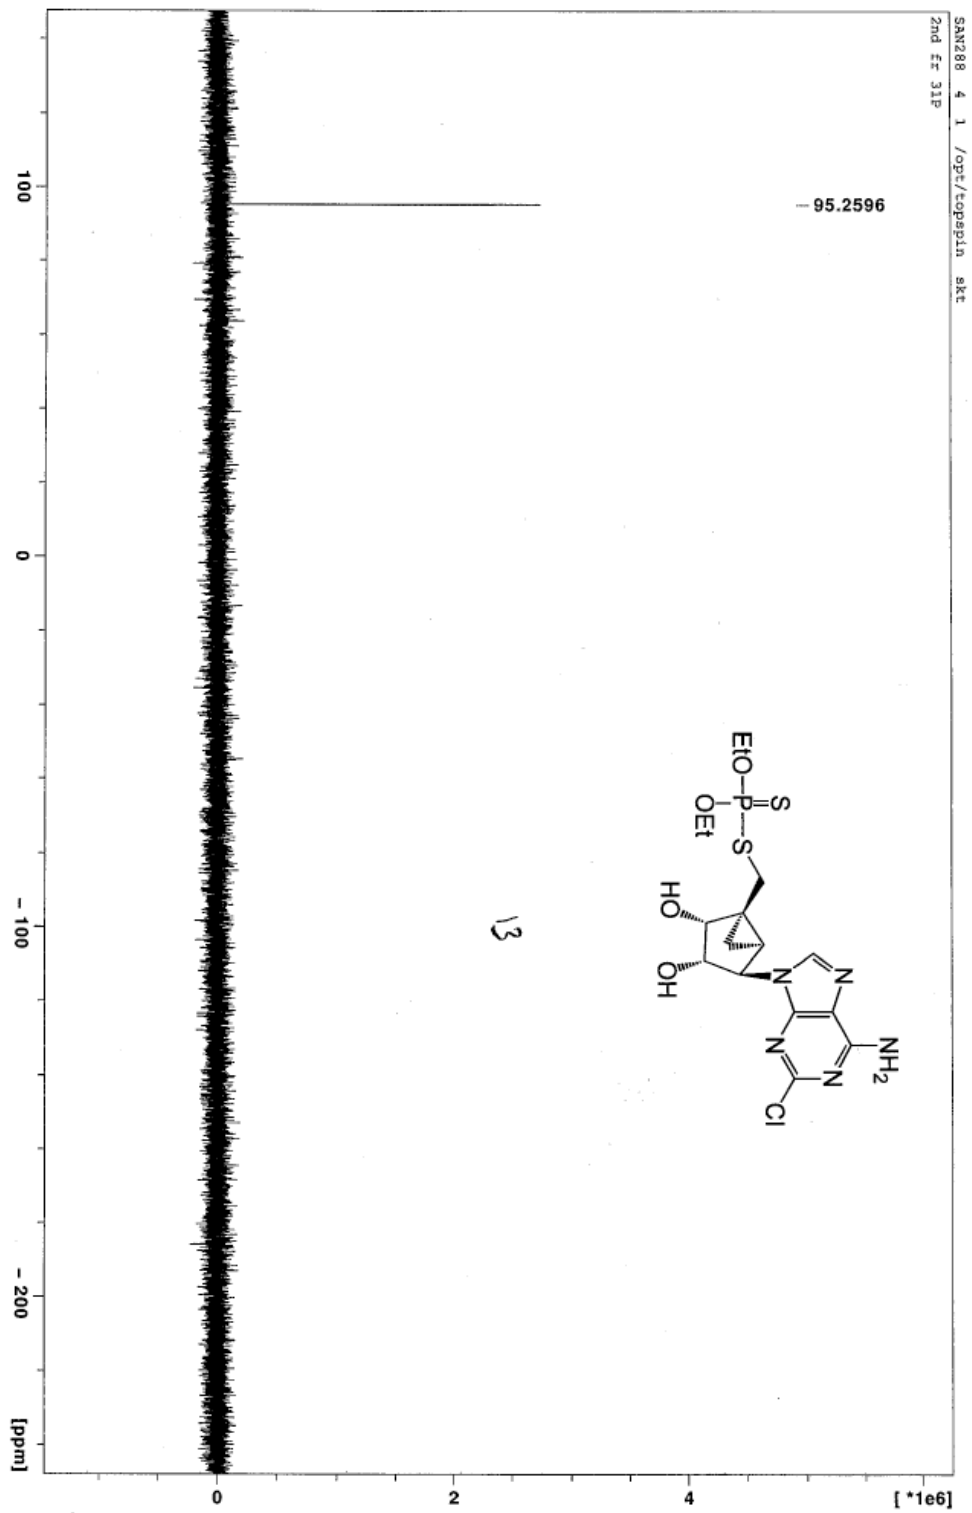

## Compound 13, HPLC

Current Chromatogram(s)

DAD1 A, Sig=254,4 Ref=360,100 (090409042443.D)  
 DAD1 B, Sig=280,4 Ref=360,100 (090409042443.D)  
 DAD1 C, Sig=275,4 Ref=360,100 (090409042443.D)

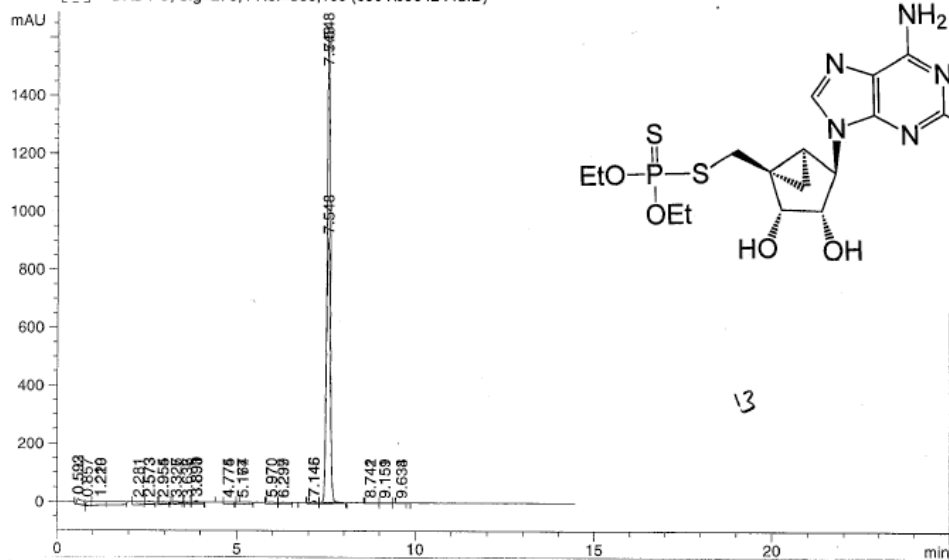

UV Apex spectrum of Peak 7.548 of 09042443.D  
 \*DAD1, 7.550 (1975 mAU, Apx) Ref=9.590 & 12.204 of 09042443.D

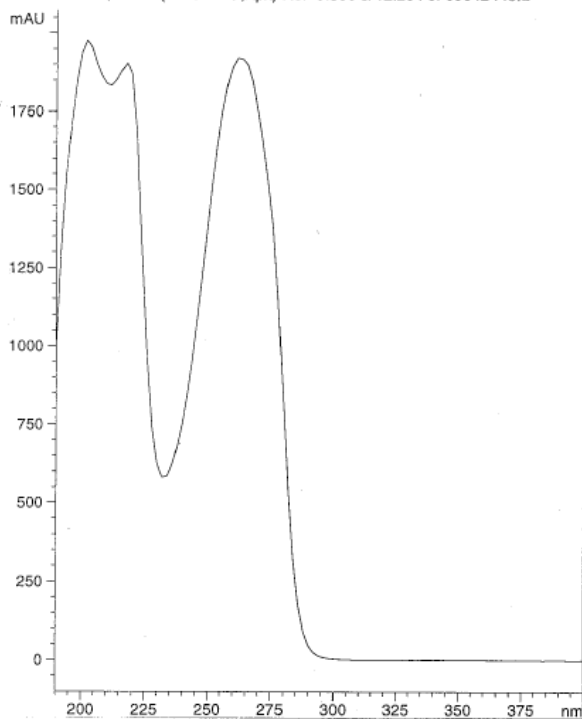

Reference spectrum(a) + Original  
 DAD1, 9.590 (20.3 mAU, Up2) of 09042443.D  
 DAD1, 12.204 (22.2 mAU, -) of 09042443.D  
 DAD1, 7.550 (1969 mAU, Apx) of 09042443.D

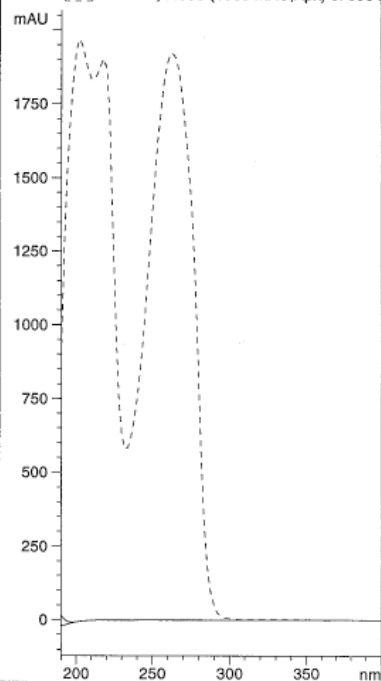

Compound 14,  $^1\text{H}$  NMR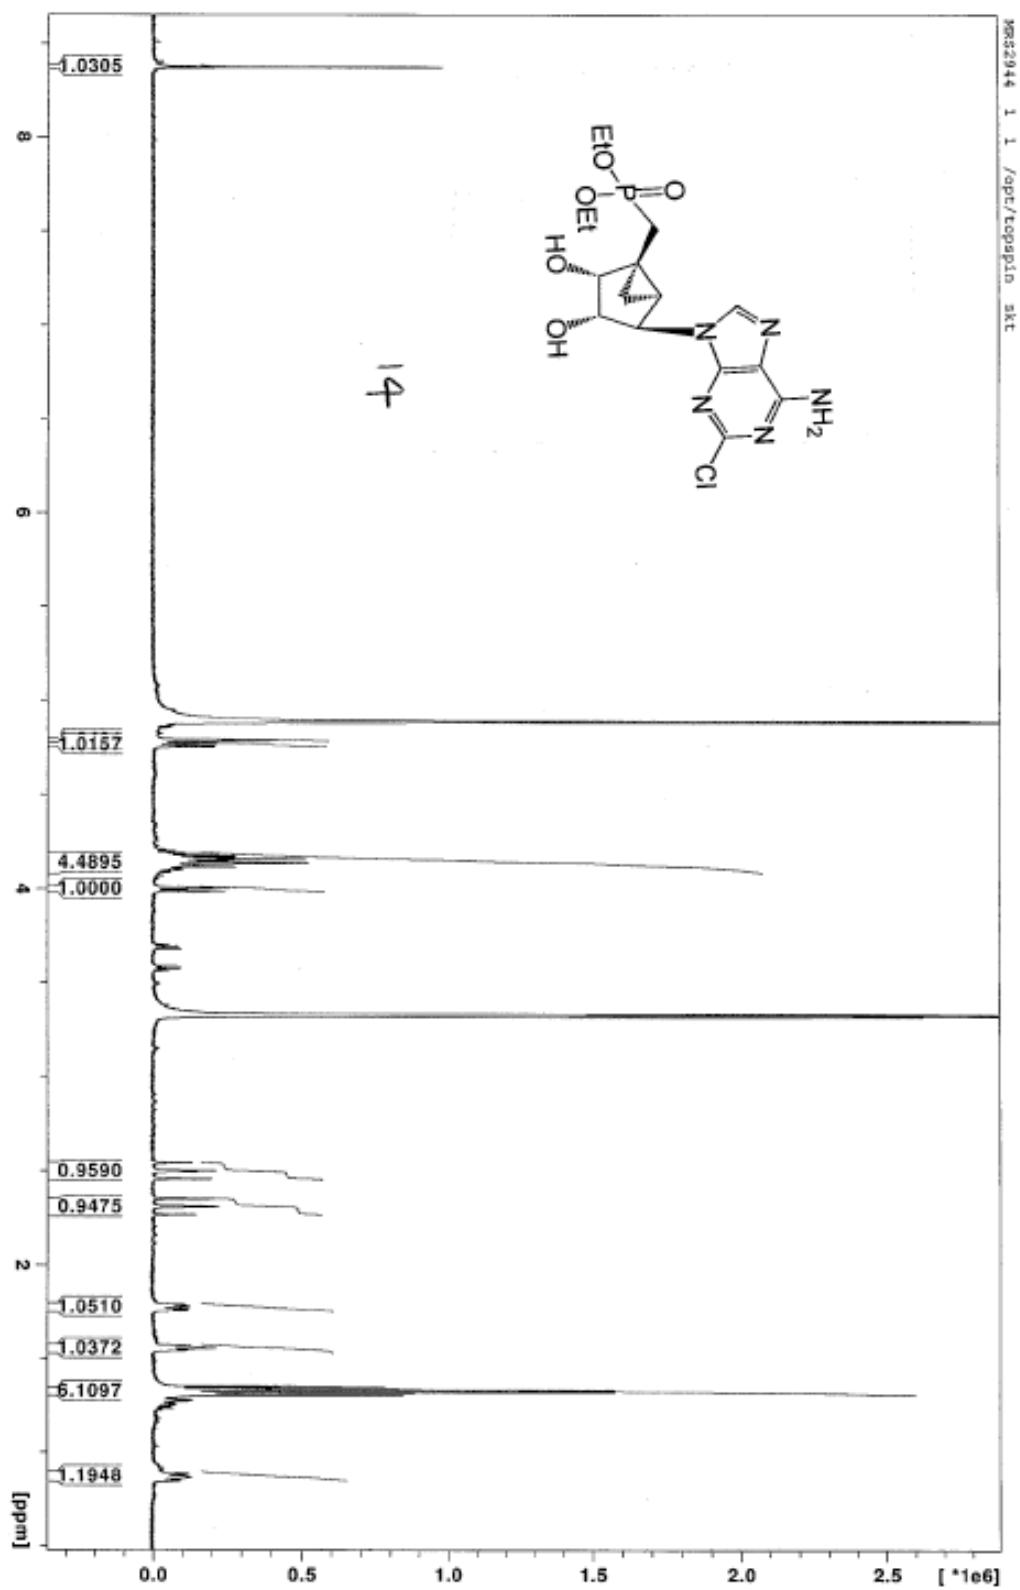

## Compound 14, HPLC

Print of all graphic windows  
#50 extr EtOAc 5/5 1g NaCl dil 1/33.3 H2O 2

=====  
Injection Date : 9/30/2011 4:10:07 PM  
Sample Name : 50 ext 1/33.3 2 Location : Vial 1  
Acq. Operator : AAG  
Method : C:\HPCHEM\1\METHODS\METHOD1.M  
Last changed : 9/30/2011 4:09:16 PM by AAG  
(modified after loading)

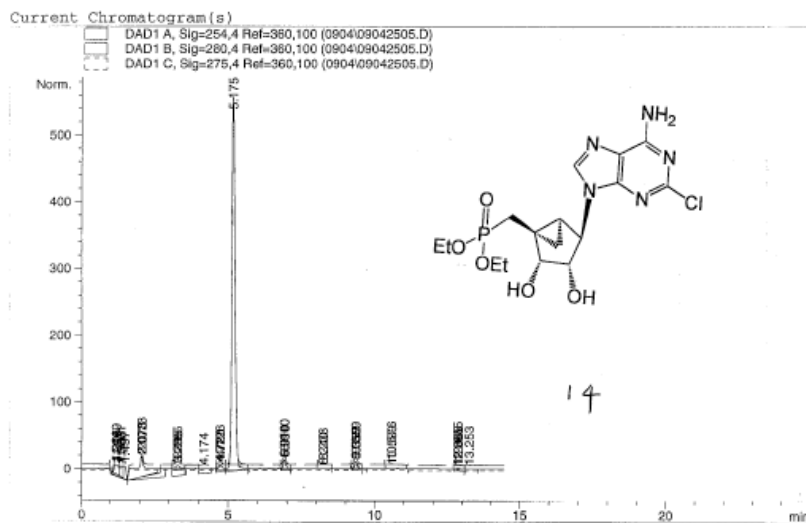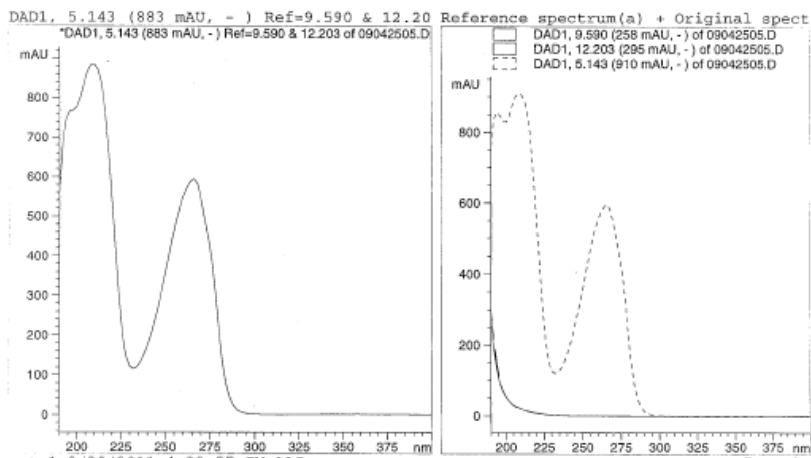



Compound **15**,  $^{31}\text{P}$  NMR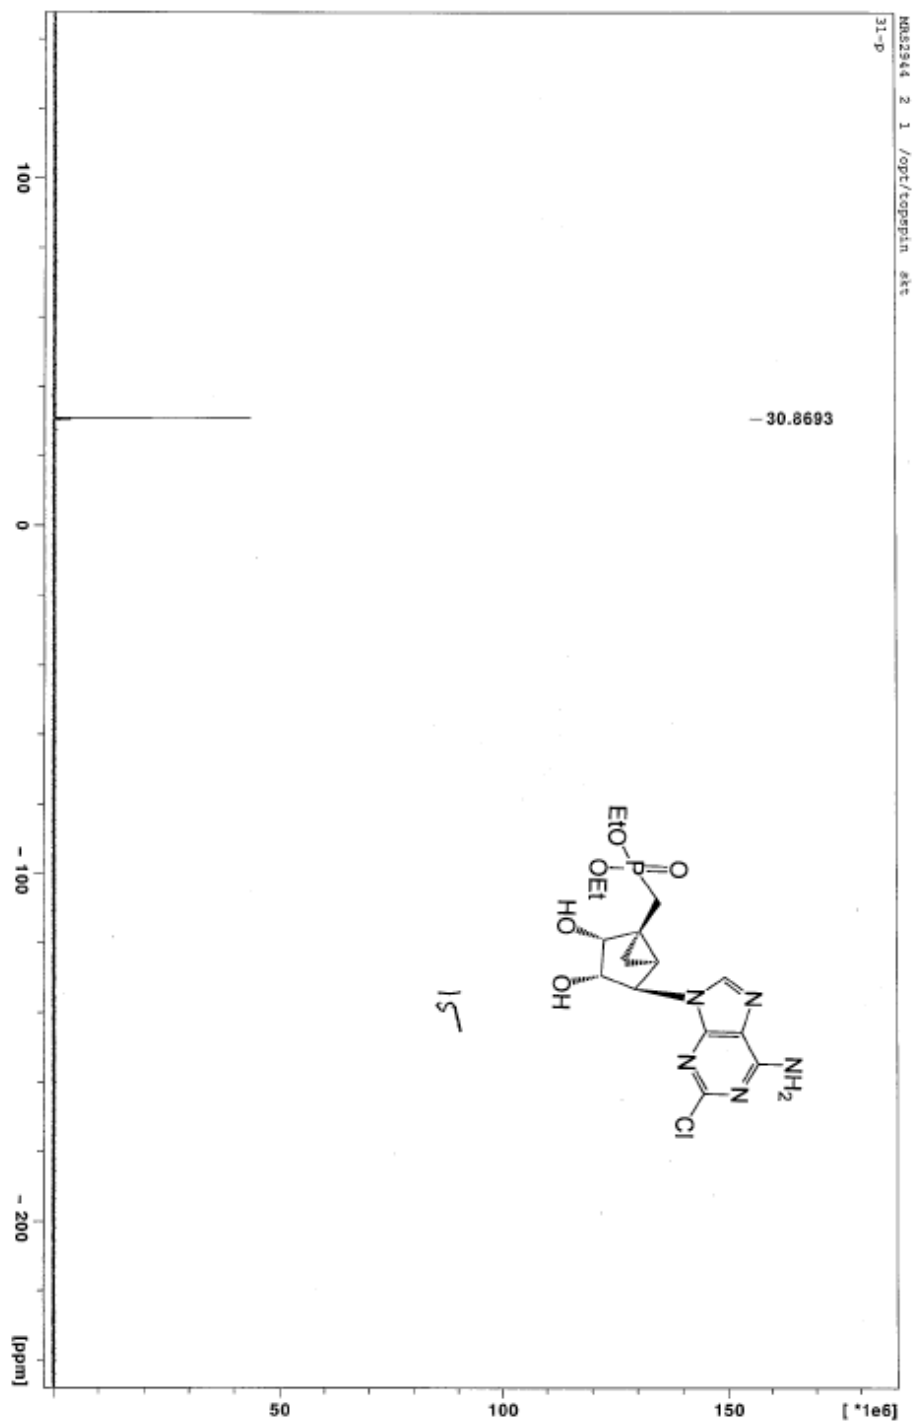



Compound 16,  $^1\text{H}$  NMR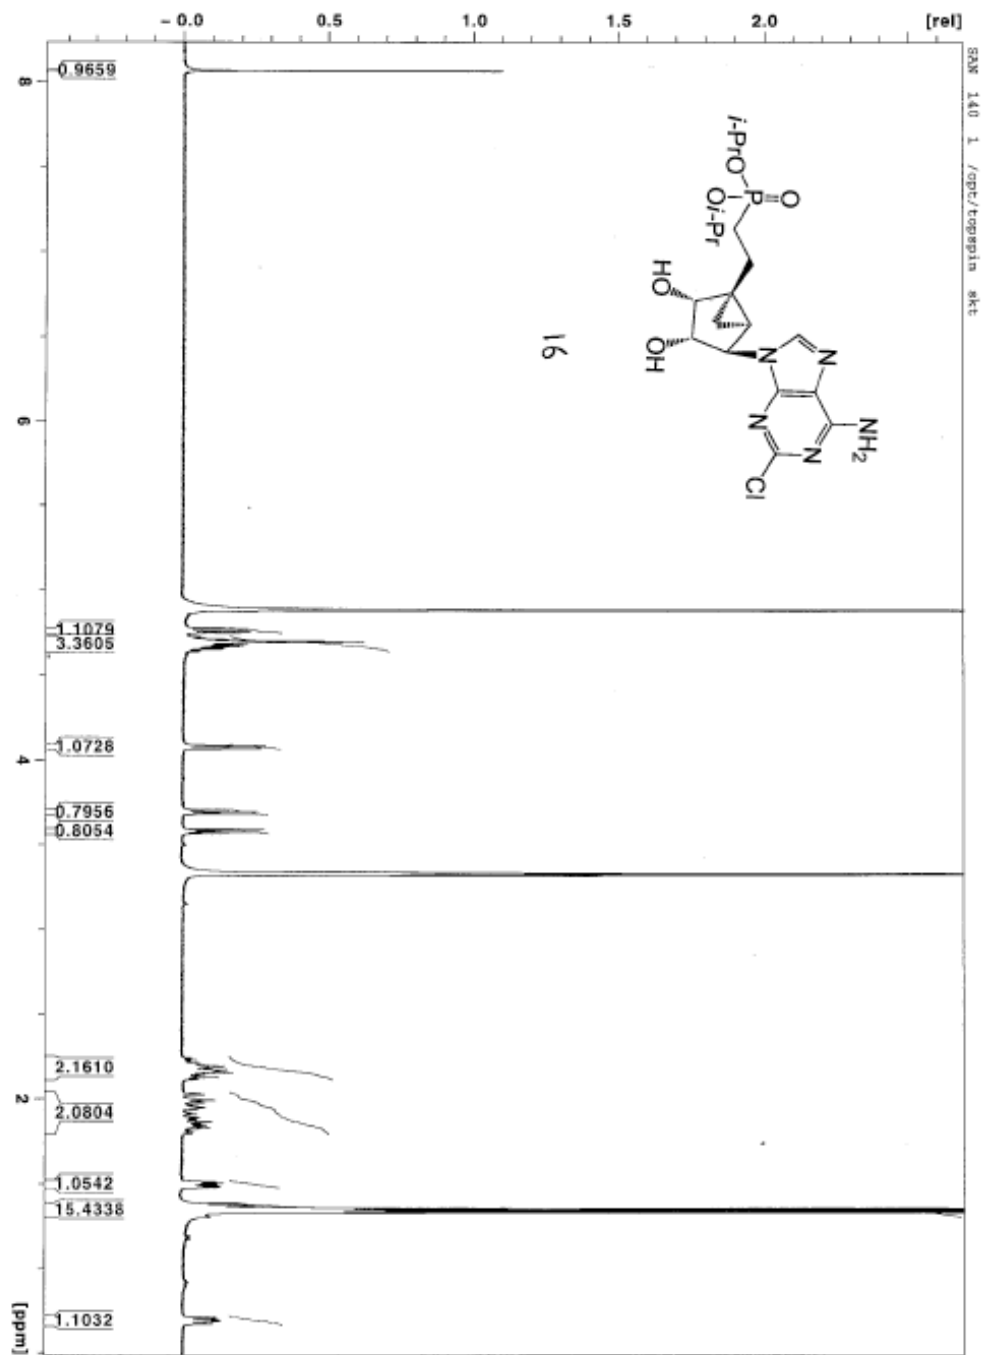

## Compound 16, HPLC

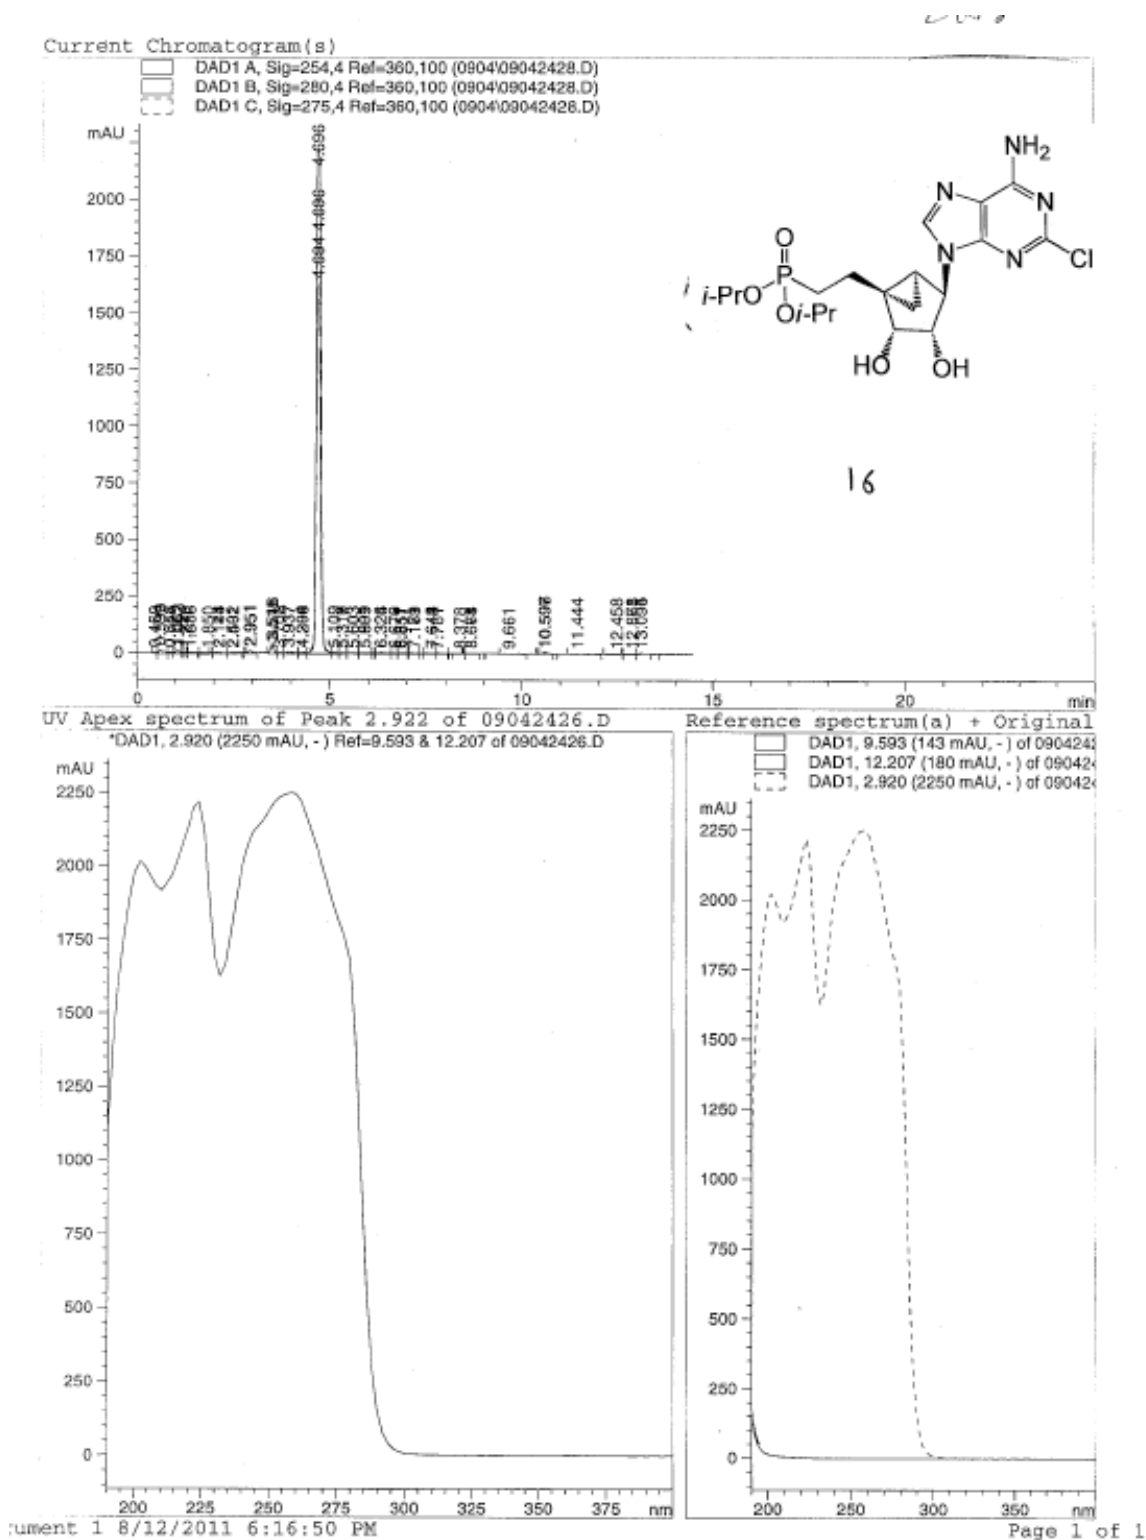

Compound 16,  $^{31}\text{P}$  NMR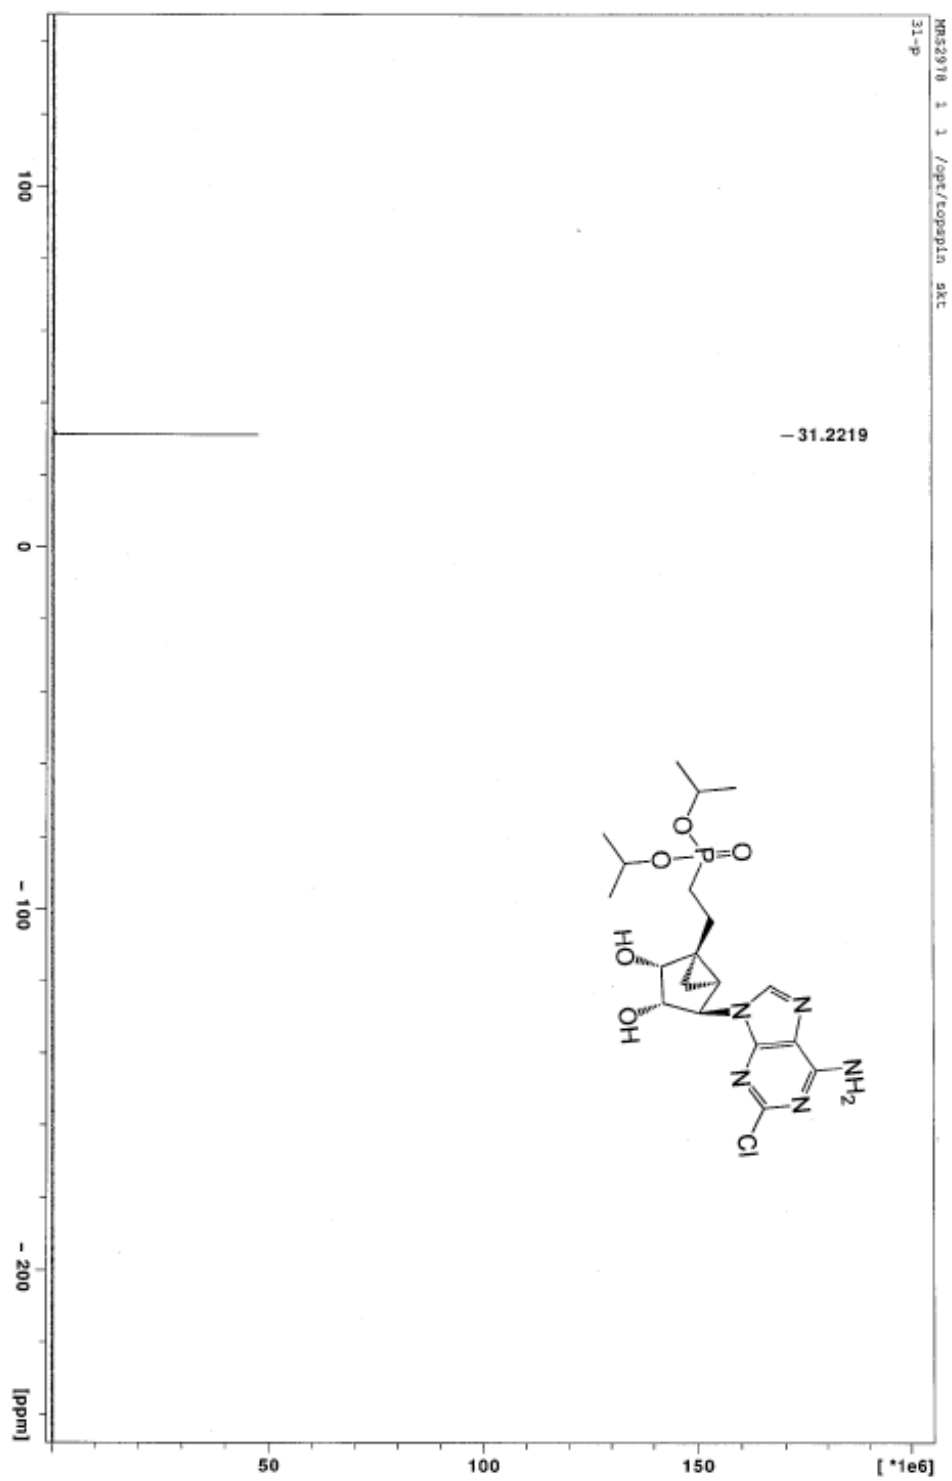

Compound 18,  $^1\text{H}$  NMR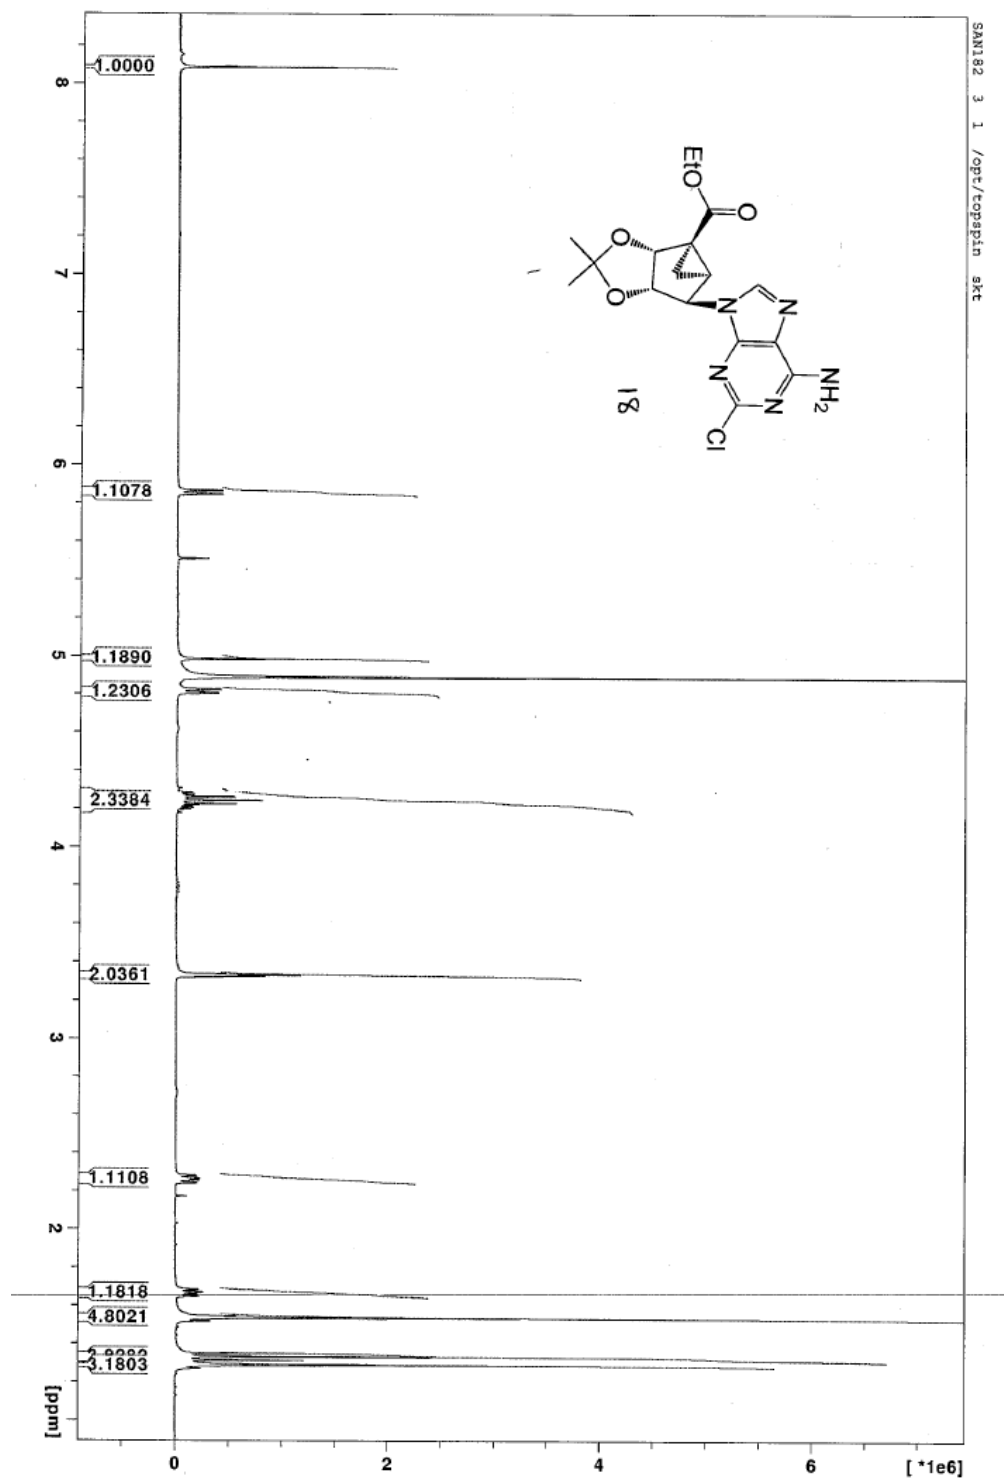

Compound 19,  $^1\text{H}$  NMR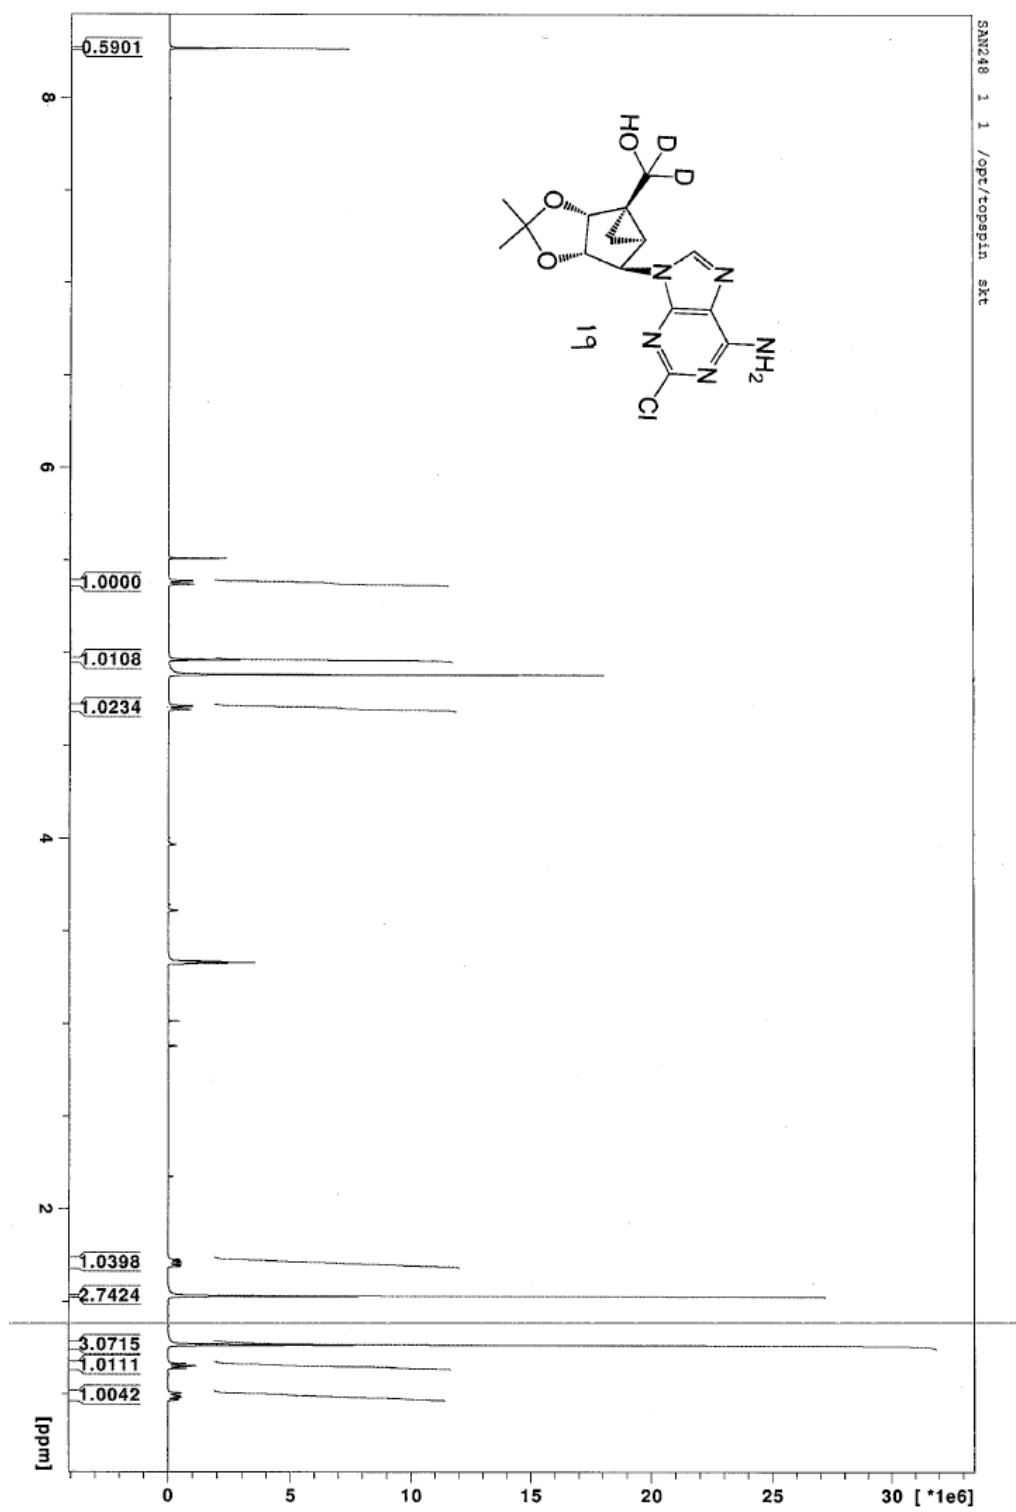

Compound 20,  $^1\text{H}$  NMR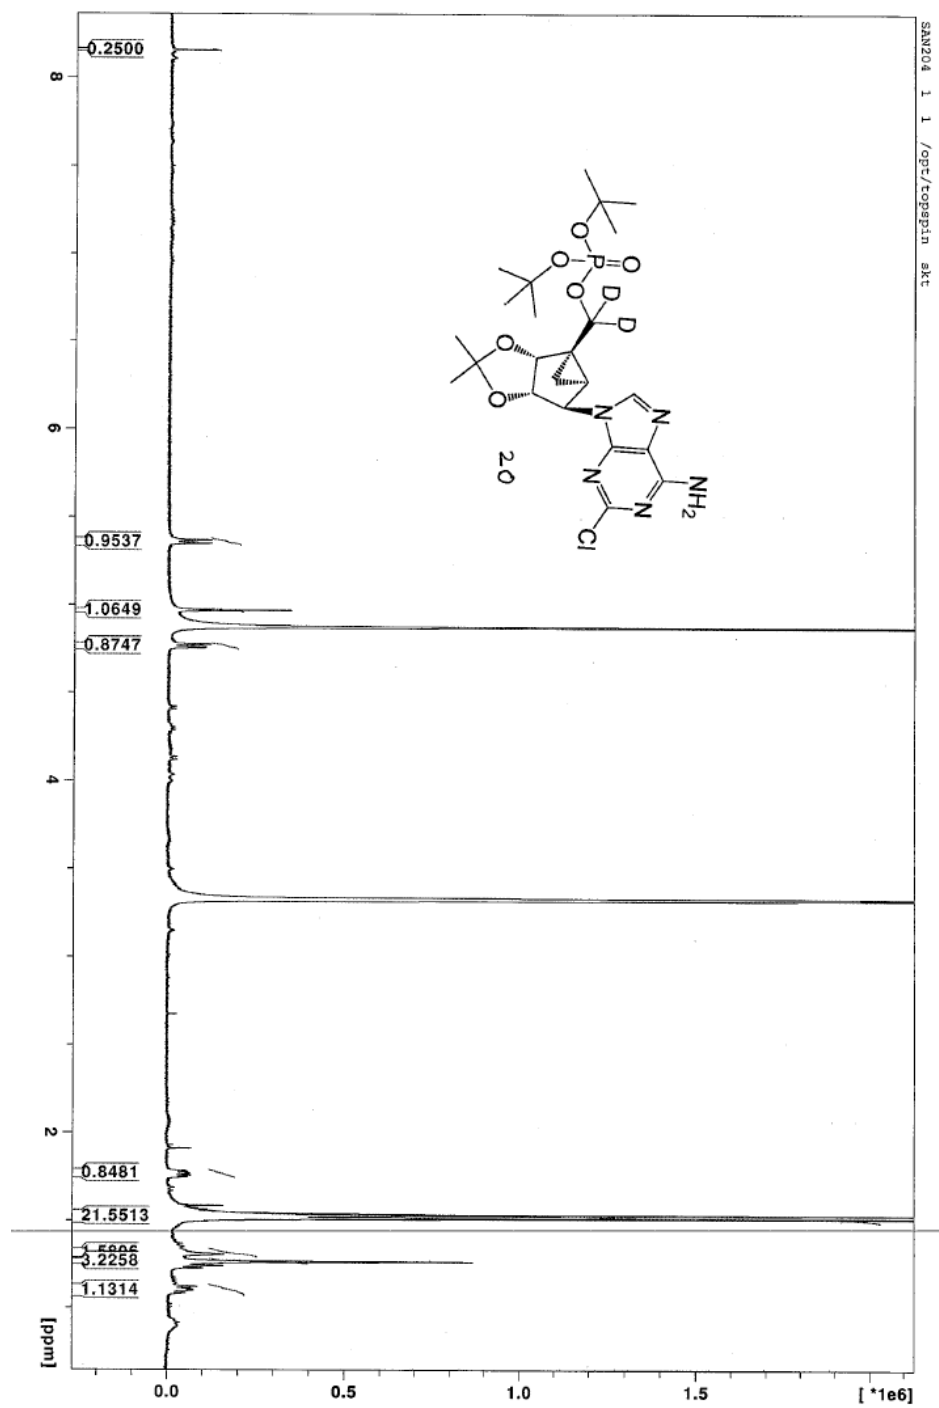

Compound 21,  $^1\text{H}$  NMR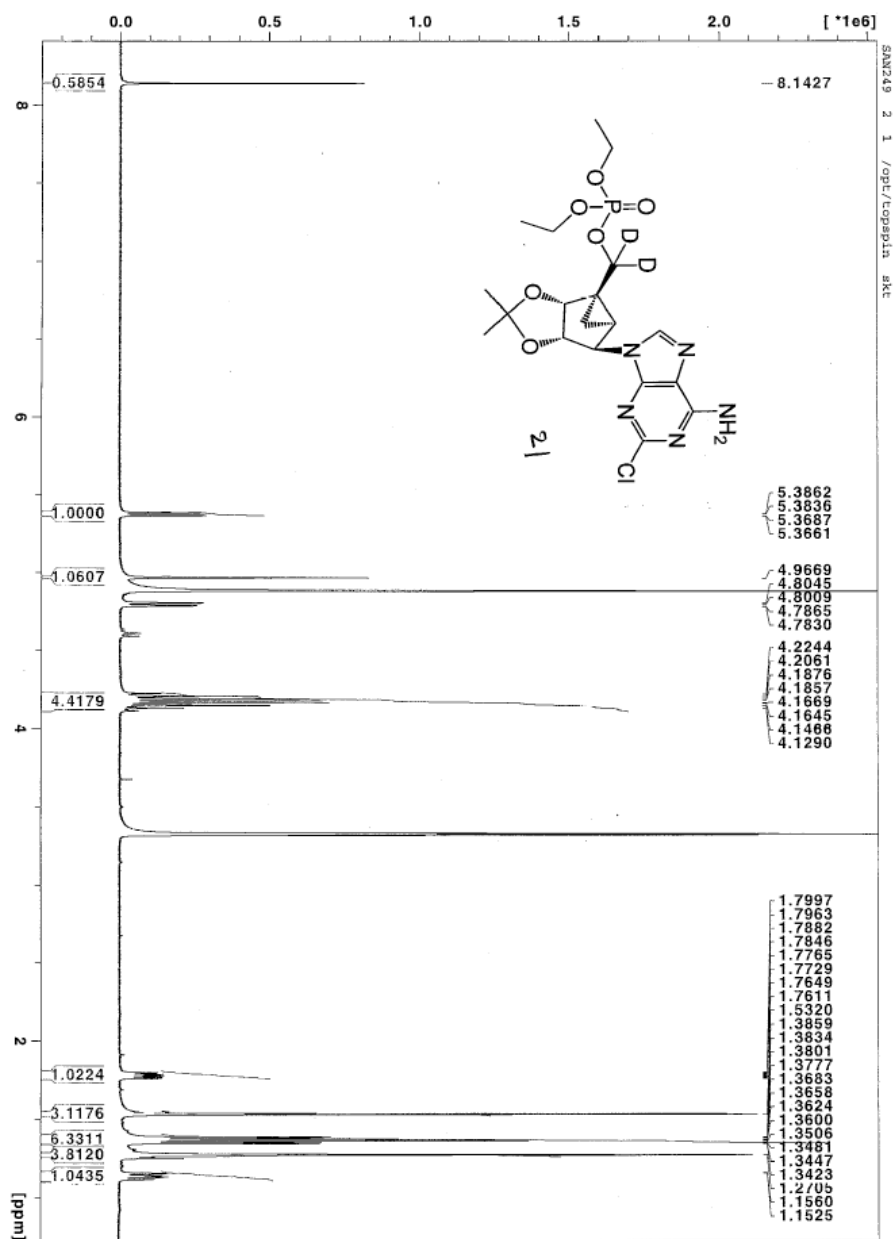





Compound 22,  $^1\text{H}$  NMR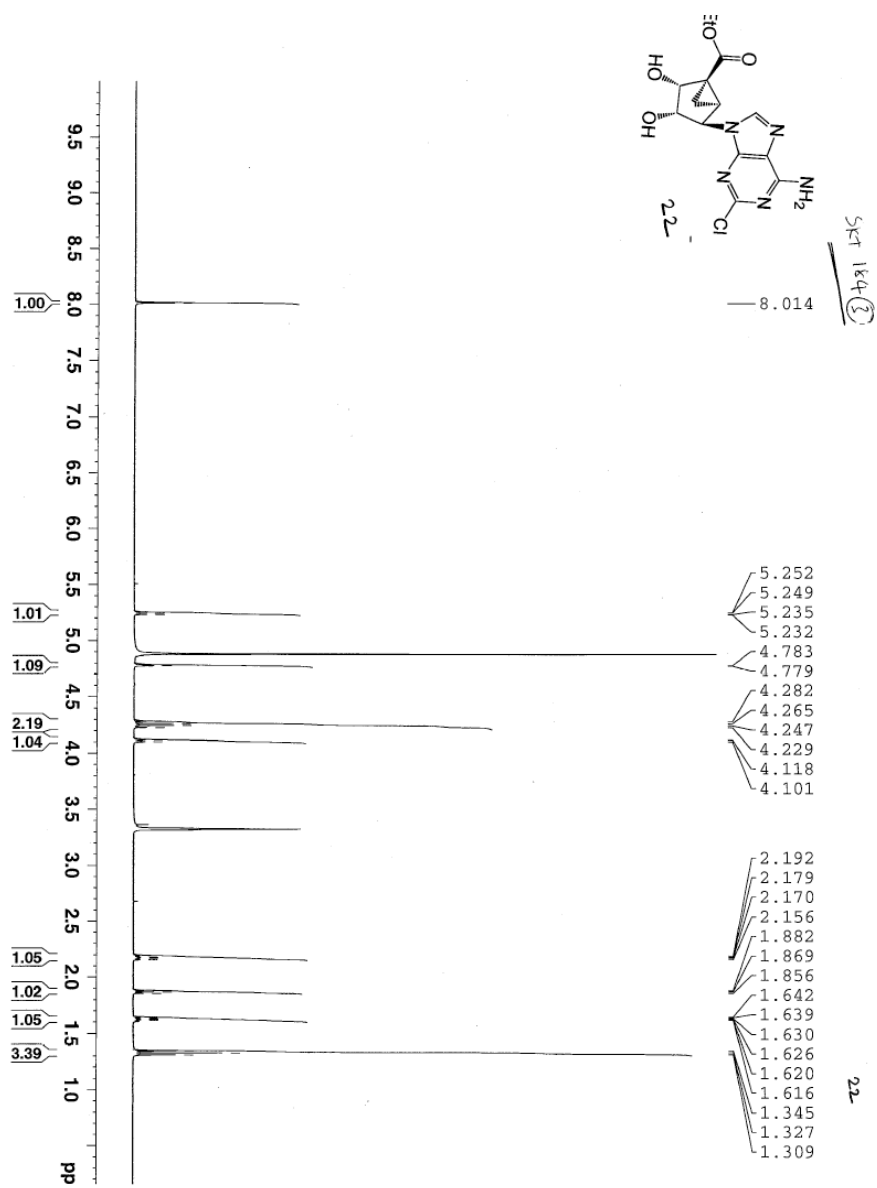

Compound 23,  $^1\text{H}$  NMR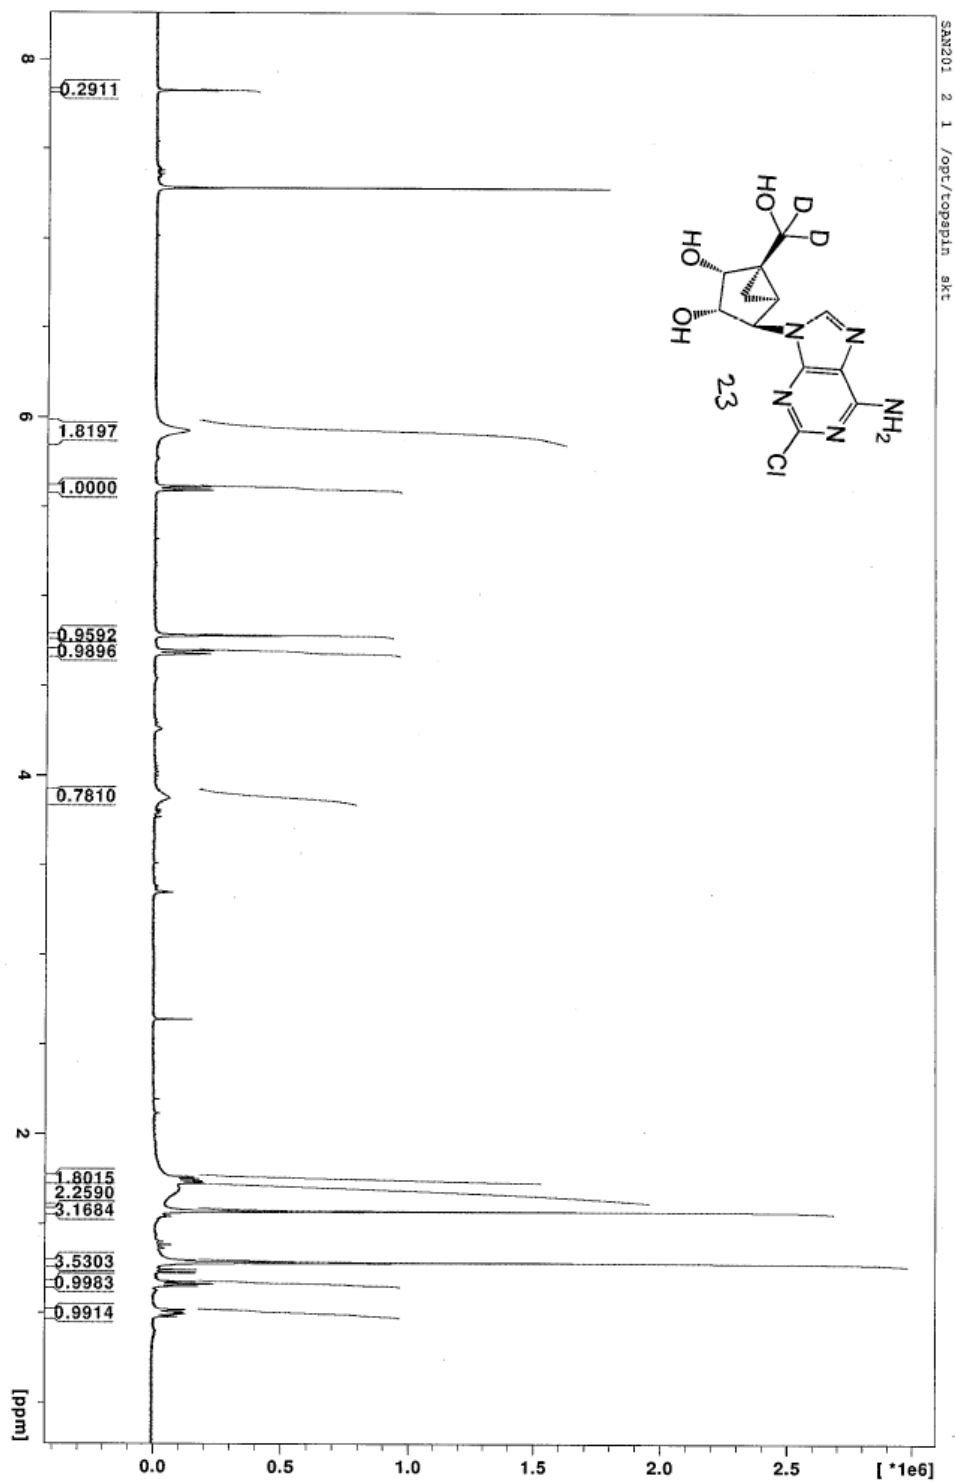

Compound 26, <sup>1</sup>H NMR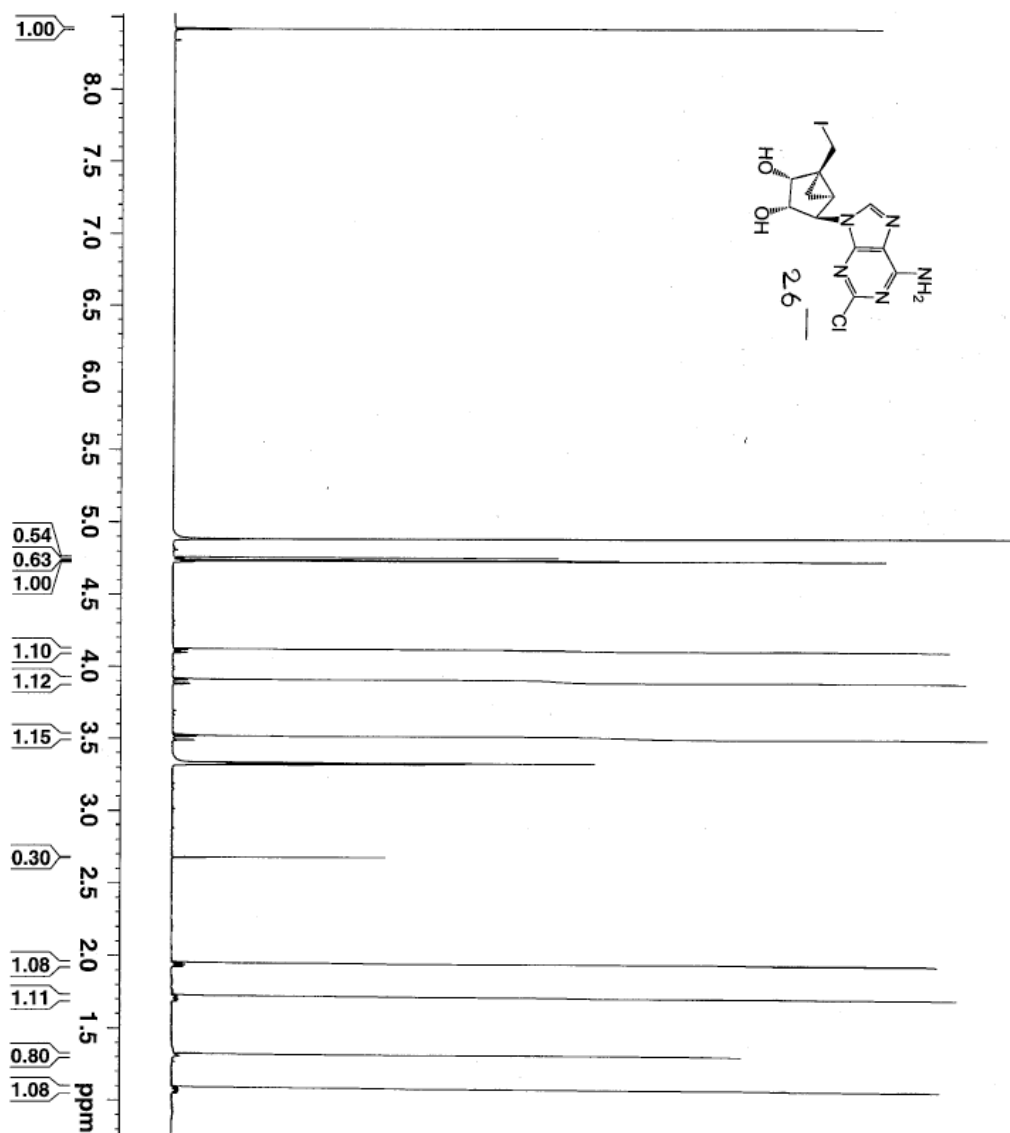

NAME SAN  
 EXPNO 138  
 PROCNO 20100305  
 Date\_ 9.52  
 Time 9.52  
 INSTRUM spect  
 PROBHID 5 mm PABBO BB-  
 PULPROG zg  
 TD 65536  
 SOLVENT MeOD  
 NS 57  
 DS 0  
 SWH 4000.000 Hz  
 FIDRES 0.061035 Hz  
 AQ 8.1920500 sec  
 RG 80.6  
 DW -25.000 usec  
 DE 6.50 usec  
 TE 297.3 K  
 D1 1.00000000 sec  
 TD0 1

===== CHANNEL f1 =====  
 NUCL1 1H  
 P1 14.00 usec  
 PL1 0.00 dB  
 PL1W 11.75562859 W  
 SFO1 400.600008 MHz  
 SI 32768  
 SF 400.580000 MHz  
 FWHM EM  
 SSB 0  
 LB 0.00 Hz  
 GB 0  
 PC 1.00

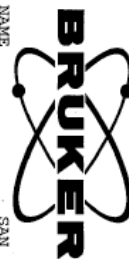

Compound 29,  $^1\text{H}$  NMR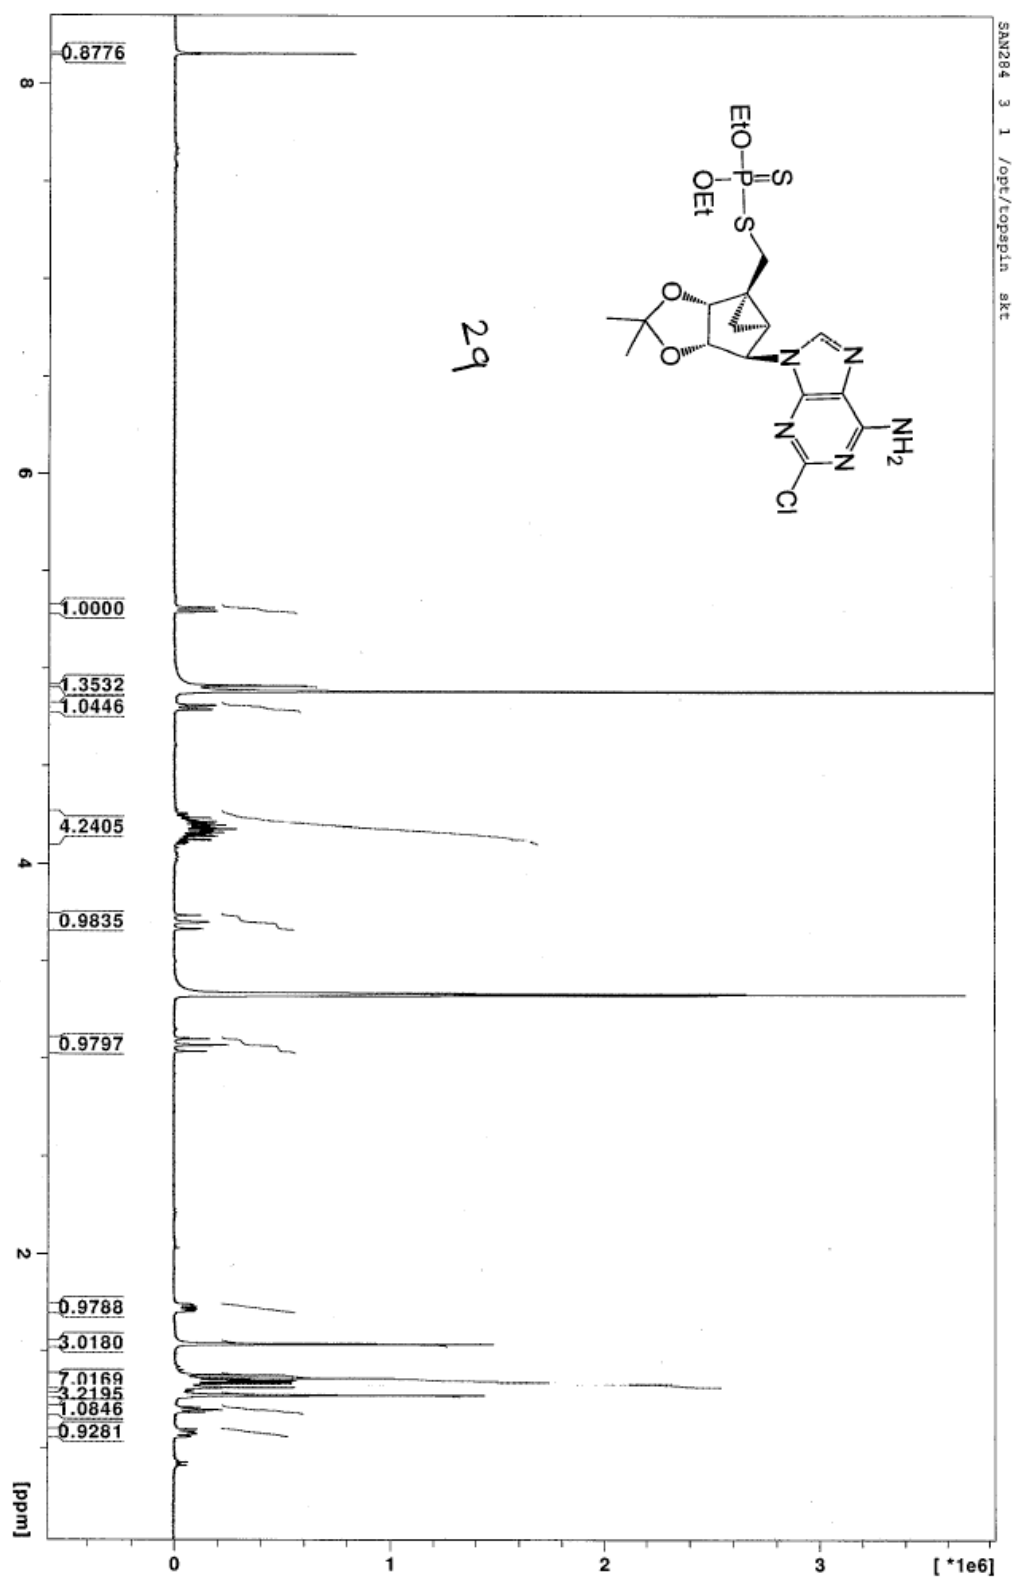

Compound 31,  $^1\text{H}$  NMR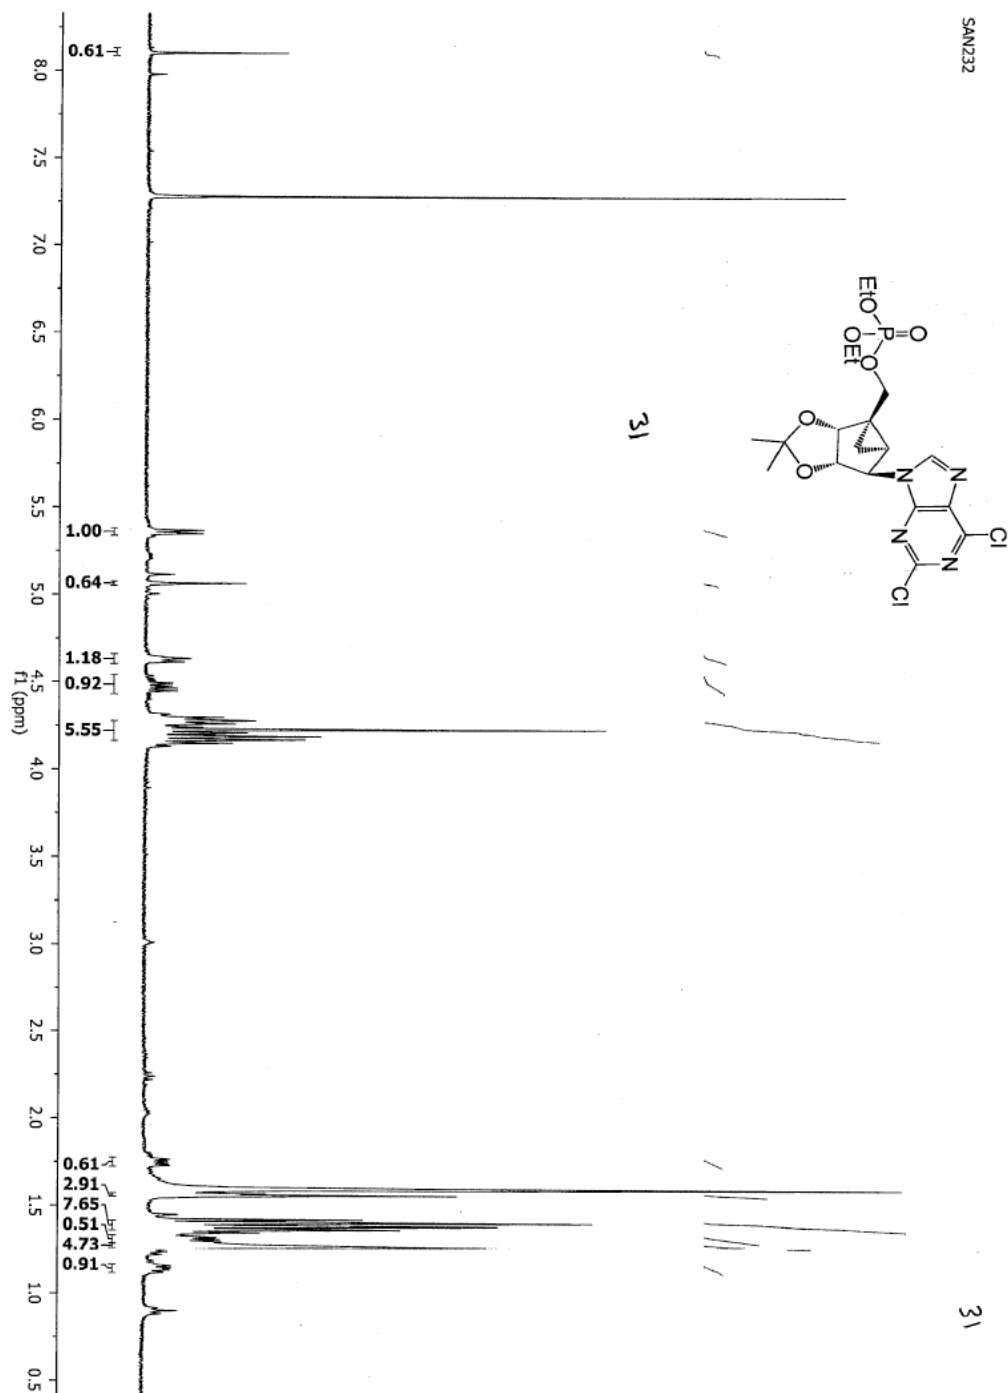

Compound 31,  $^{31}\text{P}$  NMR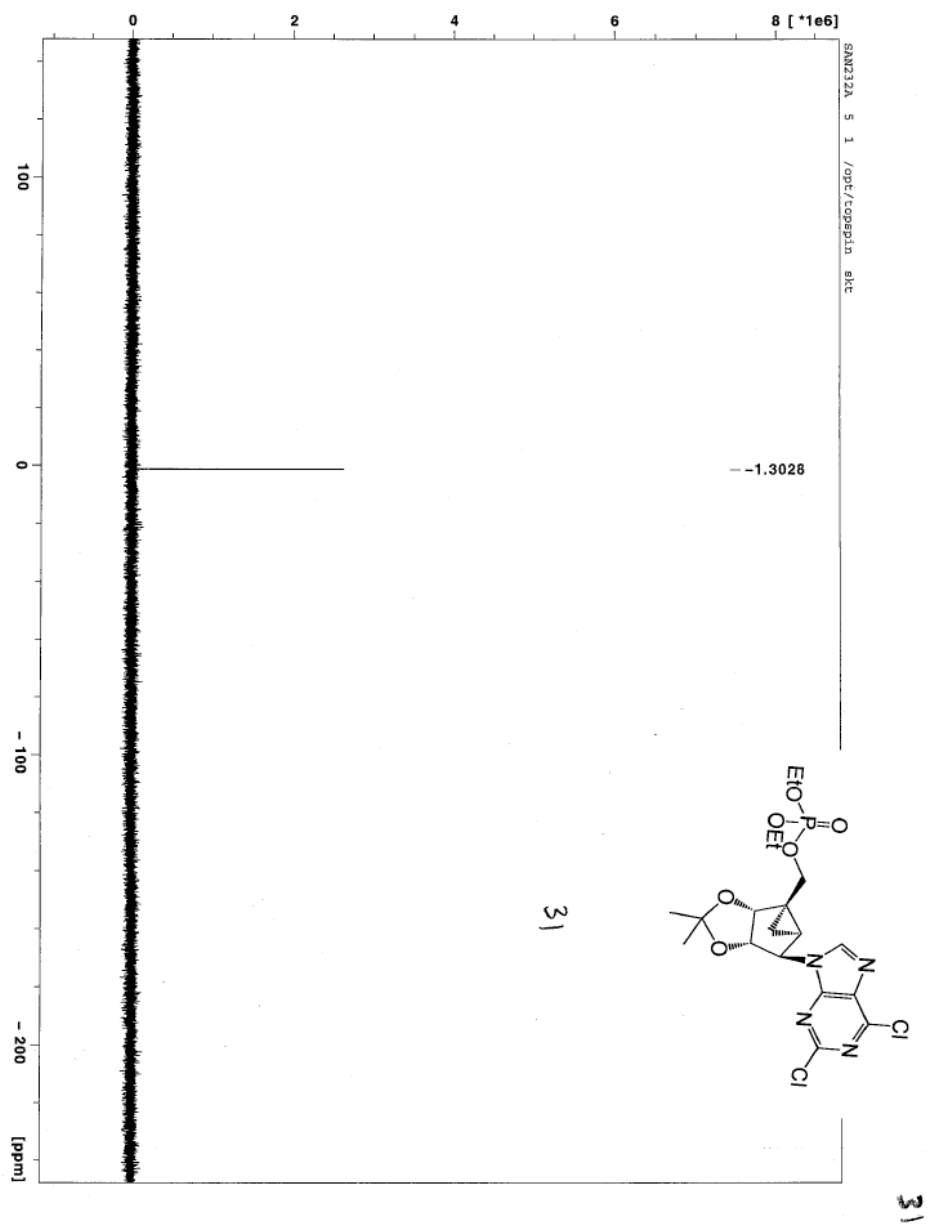

Compound 32,  $^1\text{H}$  NMR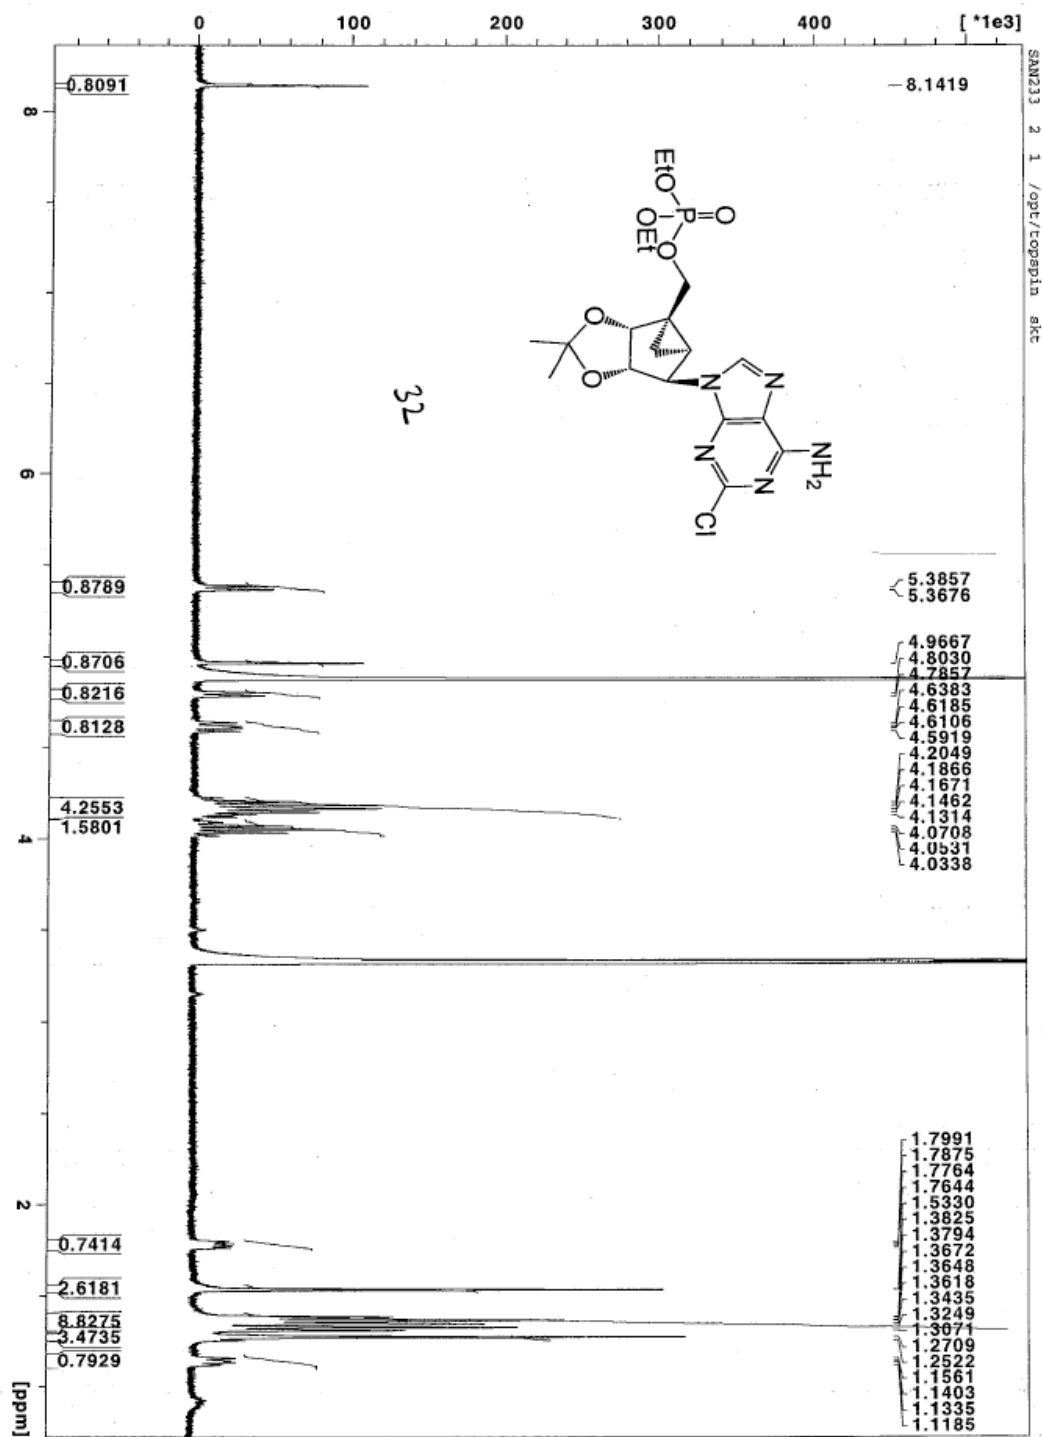

Compound 32,  $^{31}\text{P}$  NMR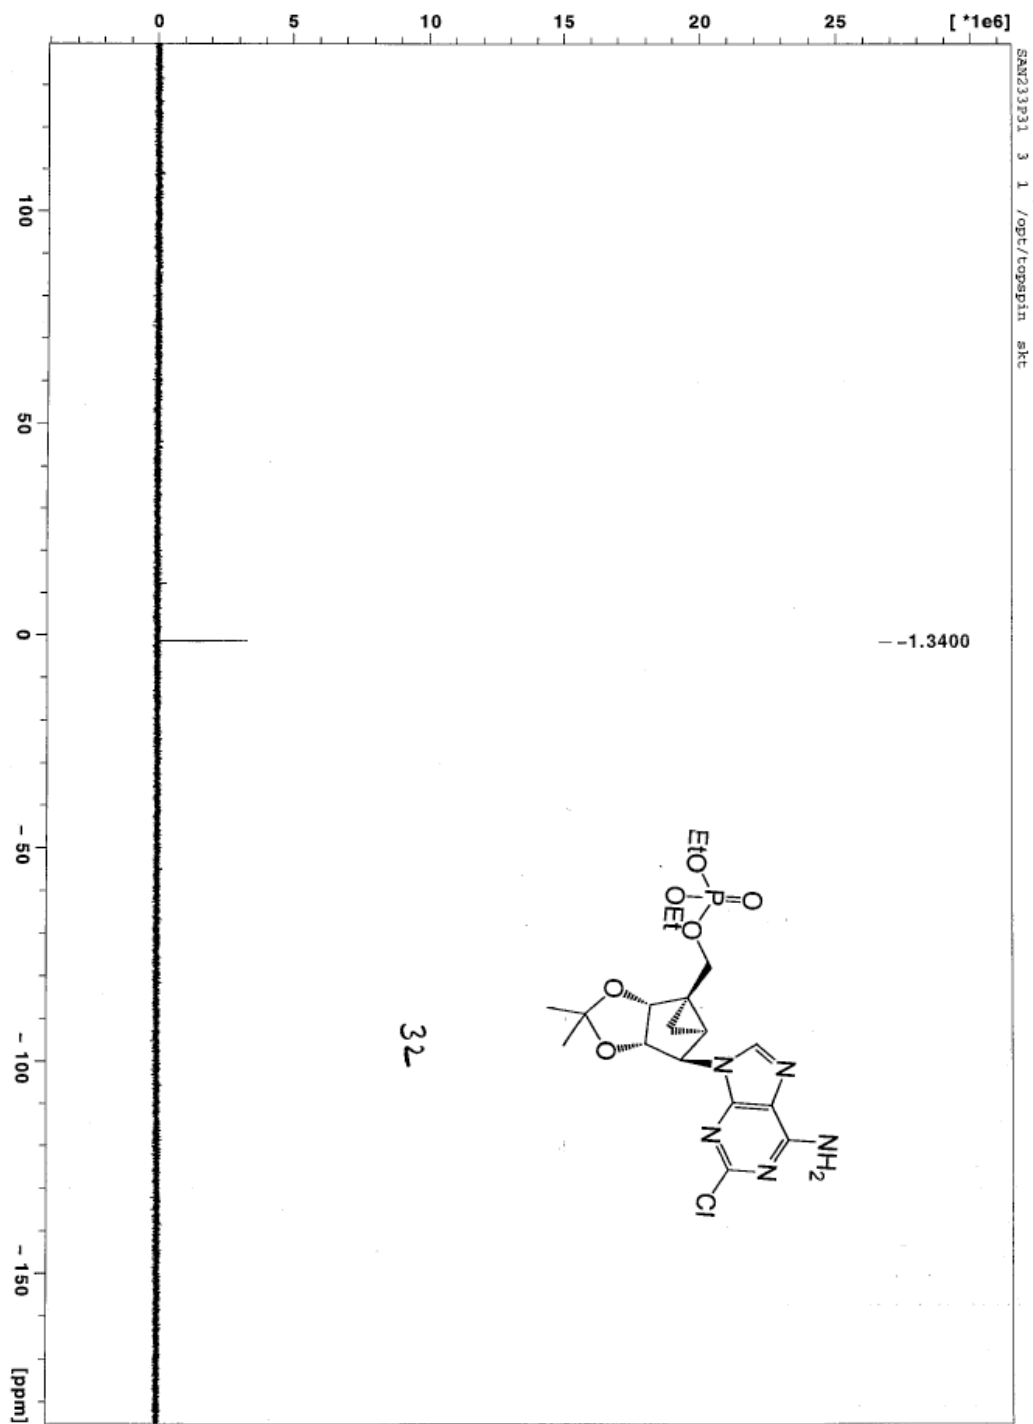



Compound 37,  $^1\text{H}$  NMR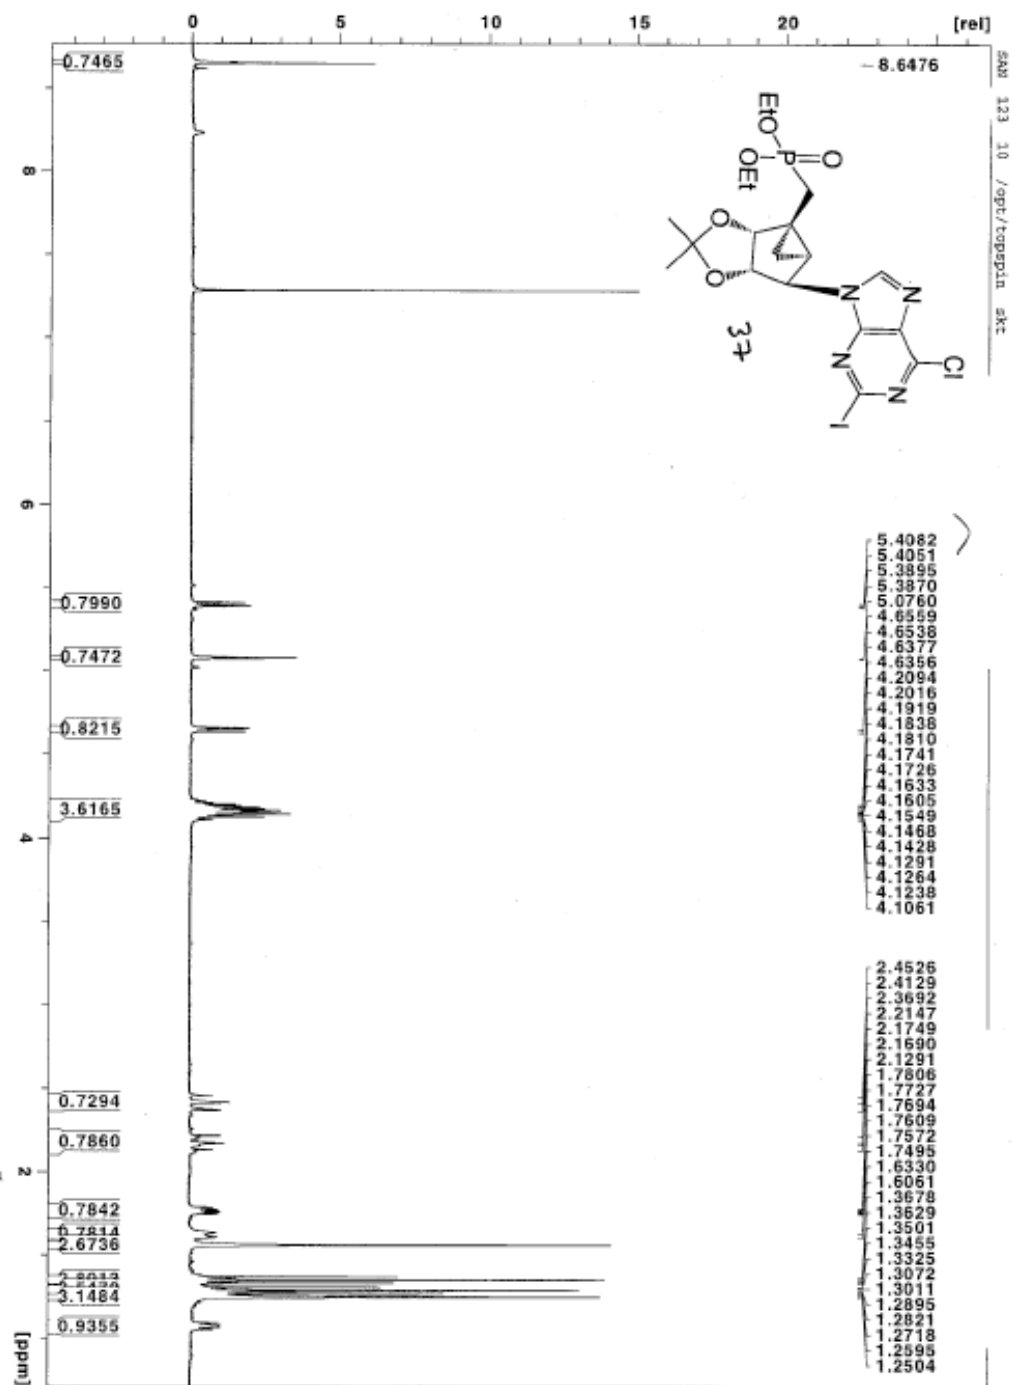

Compound 38, <sup>1</sup>H NMR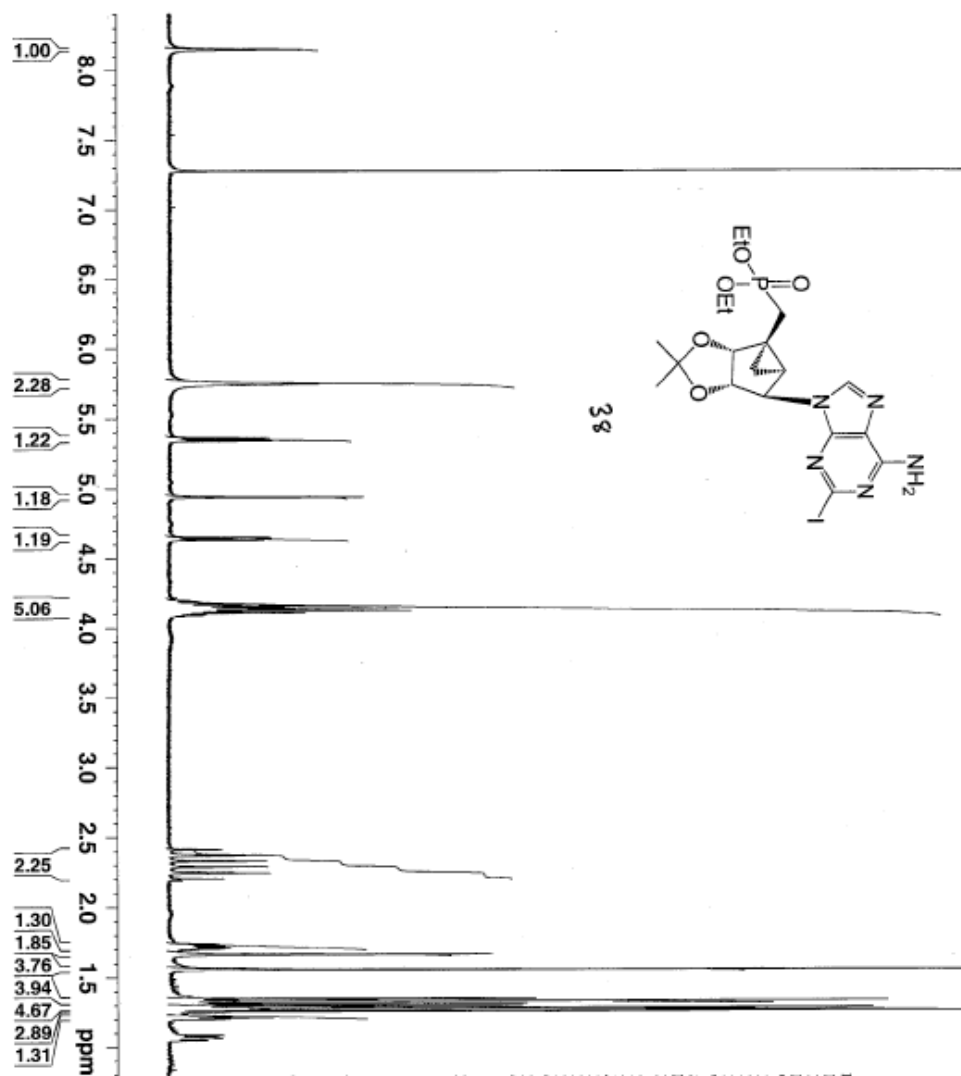

NAME  
 EXPNO 125  
 PROCNO 4  
 Date\_ 20100114  
 Time\_ 16.41  
 INSTRUM spect  
 PROBRD 5 mm PABBO BB-  
 PULPROG zgpg30  
 TD 65536  
 F2 32  
 SOLVENT CDCl3  
 NS 32  
 DS 0  
 SMF 4000.000 Hz  
 FIDRES 0.061035 Hz  
 AQ 8.1920500 sec  
 RG 80.6  
 DW 125.000 usec  
 DE 6.50 usec  
 TE 299.6 K  
 D1 1.00000000 sec  
 TD0 1

===== CHANNEL f1 =====  
 NUC1 1H  
 P1 14.50 usec  
 PL 0.00 dB  
 PL1W 11.75562859 W  
 SFO1 400.1600008 MHz  
 SI 32768  
 SF 400.1580000 MHz  
 WDR 0  
 SSB 0  
 LB 0.00 Hz  
 GB 0  
 PC 1.00


  
 3Y

### **In vivo assay procedures (CSQ mouse model)**

Although the principal screen used to evaluate the compounds was the LAD ligation model (see main text), selected phosphonate ester prodrugs were compared for cardioprotective effects in calsequestrin-overexpressing mice (genetic model of heart failure). Administered chronically via a mini-osmotic pump (Alzet), some analogues produced significantly increased intact heart contractile function compared to vehicle-infused mice.

### **CSQ-overexpressing mice as a model of systolic heart failure and compound administration.**

Mice displaying the CSQ model of severe cardiomyopathy and heart failure were bred and maintained according to a previously described method.<sup>5</sup> The CSQ transgenic (TG) mice were originally provided by Dr. Larry Jones<sup>1,2</sup> and developed hypertrophy followed by a lethal heart failure phenotype with death near the age of 3 months.

Compound **1** and its analogues were dissolved in phosphate-buffered saline, pH=7.4 at 3.3 or 10  $\mu$ M (200  $\mu$ L total volume), filtered for sterility for *in vivo* administration at 6  $\mu$ L per d for 14 d via a mini-osmotic pump (Alzet) in the CSQ mice. Intact heart function *in vivo* was assessed by echocardiography following infusion of nucleotide or vehicle.

### **Mouse echocardiography**

Transthoracic echocardiography was performed using a linear 30-MHz transducer according to manufacturer's instructions (Vevo 660 High Resolution Imaging System from VisualSonics, Toronto, Canada) similar to previously described methods.<sup>3,4</sup> Two dimensional-targeted M-mode echocardiographic measurements were carried out at mid-papillary muscle level. Mice were anesthetized with 1% isoflurane using a vaporizer as previously described.<sup>5</sup> Left ventricular end-diastolic (LVEDD) and end-systolic (LVESD) diameters, and FS (defined as LVEDD-LVESD/LVEDD) were measured. Parameters were measured digitally on the M-mode tracings and were averaged from more than 3 cardiac cycles.

### **Data analysis**

Unless otherwise indicated, data were provided as mean  $\pm$  standard error of the mean. For analysis of multiple groups, one-way ANOVA and posttest comparison were used. Student's t-test for paired or unpaired samples was used to evaluate the effects of experimental interventions;  $P < 0.05$  was taken as statistically significant.

### **Results**

Cardioprotection by the charged nucleotide analogues **1** – **3** in the CSQ mouse models was reported earlier.<sup>5</sup> However, some of the other protected ester and free phosph(on)ate derivatives lost protective activity.

A two-week infusion of the 2-iodo phosphonate derivative **6** (n=5 mice) did not improve FS or prevent LV wall thinning in CSQ-overexpressing mice with heart failure (data not shown). Thus, 2-Cl substitution of the adenine moiety as in phosphonate **2** was essential for activity; substitution with iodo in **6** abolished protection. Several new phosphate and phosphonate analogues, such as thio derivatives, were compared. A 2-week infusion of thiophosphate **5** (n=5), containing a 5'-thioester, could protect the CSQ

mice with a better preservation of LV septal ( $0.492 \pm 0.012$  mm) and posterior ( $0.493 \pm 0.016$  mm) wall thickness as compared those obtained in NS-infused (both septal and posterior:  $0.450 \pm 0.007$  mm) CSQ mice ( $P < 0.05$ , data not shown). Thus, substitution of oxygen with sulfur was tolerated.

The activity of masked (uncharged) nucleotide analogues was explored using the same experimental model. Only some of the ester prodrug derivatives of the previously characterized cardioprotective agents **1–3** were shown to act *in vivo*. These findings implied that an *in vivo* cleavage step to liberate the charged nucleotide active drug was necessary. Among the prodrug derivatives, diisopropyl ester **16** of phosphonate (1'S,2'R,3'S,4'R,5'S)-4'-(6-amino-2-chloropurin-9-yl)-2',3'-(dihydroxy)-1'-(phosphonoethylene)-bicyclo[3.1.0]hexane **3** was highly efficacious. This phosphonate diester resulted in an improved FS as compared to vehicle (Figure S1, Table S1). In mice infused with **16**, the LV posterior wall thickness and septal thickness during systole and the LV posterior wall thickness during diastole were greater than those in NS-infused CSQ mice (Figure S2).

**Table S1.** Known phosphate and phosphonate analogues: structure and effects on *in vivo* heart function as determined by echocardiography-derived FS in CSQ heart failure mice (data from reference 5).

| No       | Structure                                                                                     | FS in %<br>in CSQ Mice <sup>a</sup> | n = |
|----------|-----------------------------------------------------------------------------------------------|-------------------------------------|-----|
| <b>1</b> | 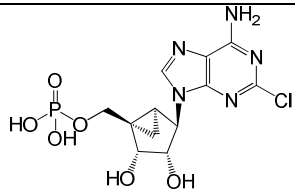<br>MRS 2339 | 15.47 ± 1.15                        | 10  |
| <b>2</b> | <br>MRS2775  | 20.25 ± 1.19*                       | 8   |
| <b>3</b> | <br>MRS2925 | 19.26 ± 1.23*                       | 16  |

<sup>a</sup> at 3.3 μM. The vehicle control mice displayed a %FS of 13.78 ± 1.19% (n=16).<sup>2</sup>

\*P<0.05 vs. vehicle

**Table S2.** Structures of novel phosphate and phosphonate analogues synthesized as potential cardioprotective agents. Selected analogues were tested for their effects on *in vivo* heart function as determined by echocardiography-derived FS in CSQ heart failure mice.

| No                         | Structure                                                                                             | FS in %<br>in CSQ Mice <sup>a</sup> | n= |
|----------------------------|-------------------------------------------------------------------------------------------------------|-------------------------------------|----|
| <b>Charged nucleotides</b> |                                                                                                       |                                     |    |
| <b>5</b>                   | 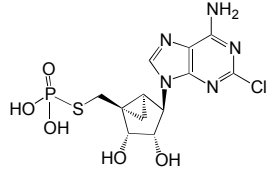<br><b>MRS2977</b>   | 14.33 ± 3.77                        | 4  |
| <b>6</b>                   | <br><b>MRS2972</b>   | 10.33 ± 1.77                        | 5  |
| <b>Masked nucleotide</b>   |                                                                                                       |                                     |    |
| <b>14</b>                  | <br><b>MRS2944</b>  | 8.58 ± 2.09                         | 4  |
| <b>16</b>                  | <br><b>MRS2978</b> | 12.94 ± 0.98*                       | 6  |

<sup>a</sup> at 10 μM. The vehicle control mice displayed a %FS of 7.13 ± 1.49% (n= 4). \*P<0.05 vs. vehicle. The CSQ mice used here were phenotypically more severe than the mice used for data in Table 1.<sup>5</sup>

**Fig. S1.** Chronic infusion of **16** (MRS2978) caused an increased LV contractile fractional shortening in calsequestrin (CSQ)-overexpressing model of heart failure. Two-dimensional directed M-mode echocardiography was carried out as described.<sup>x</sup> Following 14 d of infusion of **16** (n=6 mice) or normal saline (NS, n=4) in CSQ mice, LV fractional shortening (FS) was compared between the two groups. Treatment with **16** resulted in improved *in vivo* LV contractile function in animals with heart failure. Data are mean and standard error.

**2-week infusion of MRS2978 caused an improved intact heart fractional shortening *in vivo***

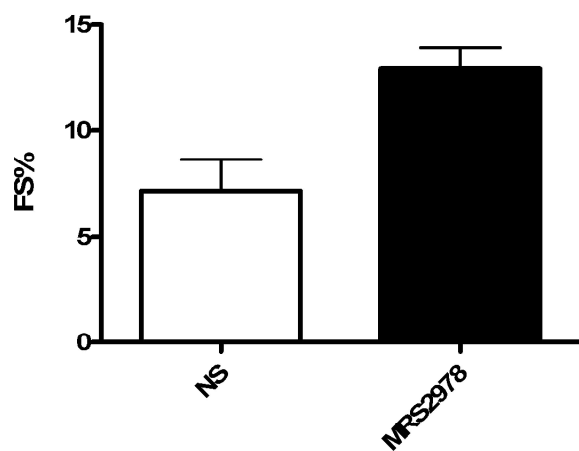

NS, n=4 vs. MRS2978, n=6, P<0.01

Fig. 1

**Fig. S2.** Chronic infusion of **16** (MRS2978) resulted in preservation of LV wall thickness in CSQ-overexpressing heart failure mice. The *in vivo* cardiac wall thickening was assessed by echocardiography following 14 d of infusion of **16** or NS in CSQ mice. **a:** In **16**-infused animals, the LV posterior wall thickness during systole (LVPW@S) was greater ( $P < 0.05$ ) than that in NS-infused CSQ mice ( $P < 0.01$ ). **b:** Similar data were obtained when septal thickness during systole (IVS@S) was compared between **16**-treated and NS-treated CSQ mice,  $P < 0.01$ . **c:** LV posterior wall thickness during diastole was also greater in **16**-infused than in NS-infused CSQ mice,  $P < 0.05$ . Data are expressed as mean  $\pm$  SEM. The data suggest that treatment with **16** was able to prevent LV wall thinning in heart failure.

2-week infusion of MRS2978 caused a preserved LV posterior wall thickness at systole

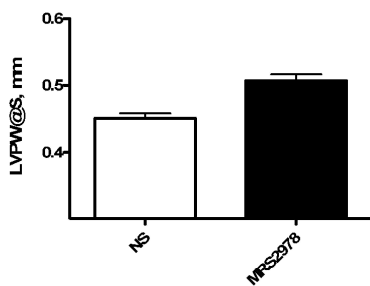

Fig. 2a

2-week infusion of MRS2978 caused an improved LV septal thickening at systole

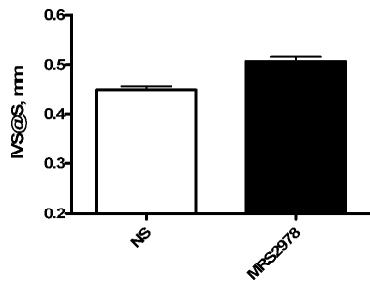

Fig. 2b

2-week infusion of MRS2978 caused a preserved LV posterior wall thickness at diastole

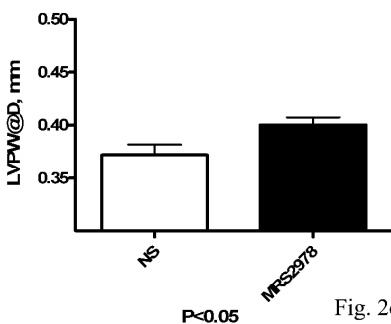

Fig. 2c



### Stability studies

Phosphonate diester **16** (MRS2978) was tested for stability when incubated with aqueous medium at pH 1 and pH 11 at 50 °C or in the presence of rat plasma,<sup>6</sup> or mouse or rat liver microsomes.<sup>7,8</sup> Analysis was by HPLC, using an internal standard 1,3-dimethyl-7-(2,3-dihydroxypropyl)xanthine. Phosphonate diester **14** (MRS2944) was tested for stability when incubated in the presence of rat plasma.

### Procedures:

**16** (2.8 mg) and 7-(2,3-dihydroxypropyl)theophylline (2.1 mg, Aldrich), an internal standard, were dissolved in DMSO (500  $\mu$ L). This solution was filtered through a centrifugal 0.45  $\mu$ m filter (Millex-HN), and the filtrate became the "stock solution". Lyophilized rat plasma (1.0 mL, Sigma) was reconstituted with Milli-Q water (1.0 mL). This plasma solution was incubated at 37 °C for 15 min. The plasma solution was diluted with 0.01 M phosphate buffered saline (0.250 mL), pH 7.0, to afford an 80% plasma solution. The solution was incubated at 37 °C for an additional 5 min. An aliquot (100  $\mu$ L) of the stock solution was added to the rat plasma (1.0 mL, 80% plasma). The final concentration of compound **16** in the plasma solution was 1.09 mM. Aliquots (10  $\mu$ L) of this solution were then collected at various time intervals and diluted with acetonitrile (90  $\mu$ L) to precipitate any protein. The aliquots were thoroughly mixed and then centrifuged at 10,000 rpm for 5 min to precipitate any protein present as a pellet. After centrifugation, a supernatant aliquot (10  $\mu$ L) was removed from sample and analyzed using Hewlett–Packard 1100 HPLC equipped with a Zorbax SB-Aq 5  $\mu$ m analytical column (50 x 4.6 mm; Agilent Technologies Inc., Palo Alto, CA). The mobile phase was a linear gradient solvent system: 5 mM TBAP (tetrabutylammonium dihydrogenphosphate)-CH<sub>3</sub>CN from 80:20 to 40:60 in 13 min; the flow rate was 0.5 mL/min. Peaks were detected by UV absorption with a diode array detector at 254 nm.

Hydrolytic stability of compound **16** was tested in the presence of pooled mouse liver microsomes (4.6  $\mu$ g/ $\mu$ L protein). **16** (2.8 mg) and 7-(2,3-dihydroxypropyl)theophylline (2.1 mg), an internal standard, were dissolved in DMSO (500  $\mu$ L). This solution was filtered through a 0.45  $\mu$ m filter (Millex-HN). This solution became the "stock solution". Pooled mouse liver microsome (4.6  $\mu$ g/ $\mu$ L protein) was diluted with 0.01 M phosphate buffered saline, pre-warmed at 37 °C, to obtain 0.5  $\mu$ g/ $\mu$ L protein concentrations. 50  $\mu$ L of 10 mM magnesium chloride, 41.6  $\mu$ L of stock solution of compound **16**, 13  $\mu$ L of 0.5  $\mu$ g/ $\mu$ L mouse microsomes and 345.4  $\mu$ L of phosphate buffered saline were pre-warmed at 37 °C. 50  $\mu$ L of 10 mM NADPH solution made in phosphate-buffered saline was added to start the reaction. For the control, NADPH was replaced by 50  $\mu$ L of phosphate buffer. Aliquots (10  $\mu$ L) of this solution were then collected at various time intervals and diluted with cold acetonitrile (300  $\mu$ L) and vigorously shaken to precipitate any protein. The aliquots were thoroughly mixed and then centrifuged at 9000 rpm for 15 min to sediment the precipitated protein. After centrifugation, the supernatant (10  $\mu$ L) of these aliquots was analyzed using Hewlett–Packard 1100 HPLC equipped with Zorbax SB-Aq 5  $\mu$ m analytical column (50 x 4.6 mm; Agilent Technologies. Inc., Palo Alto, CA). The mobile phase was a linear gradient solvent system: 5 mM TBAP (tetrabutylammonium dihydrogenphosphate)-CH<sub>3</sub>CN from 80:20 to 40:60 in 13 min; the flow rate was 0.5 mL/min. Peaks were detected by UV absorption with a diode array detector at 254 nm.

Hydrolytic stability of **16** was tested in the presence of pooled rat liver microsomes (4.6  $\mu\text{g}/\mu\text{L}$  protein, Sigma). **16** (2.8 mg) and 7-(2,3-dihydroxypropyl)theophylline (2.1 mg), an internal standard, were dissolved in DMSO (500  $\mu\text{L}$ ). This solution was filtered through a 0.45  $\mu\text{m}$  filter (Millex-HN). This solution became the “stock solution”. Pooled mouse liver microsomes (20  $\mu\text{g}/\mu\text{L}$  protein) was diluted with 0.01 M phosphate buffered saline, pre-warmed at 37 $^{\circ}\text{C}$ , to obtain 1  $\mu\text{g}/\mu\text{L}$  protein concentrations. 50  $\mu\text{L}$  of 10 mM magnesium chloride, 41.6  $\mu\text{L}$  of stock solution of compound **16**, 20  $\mu\text{L}$  of 1  $\mu\text{g}/\mu\text{L}$  rat microsomes and 345.4  $\mu\text{L}$  of phosphate buffered saline were pre-warmed at 37 $^{\circ}\text{C}$ . 50  $\mu\text{L}$  of 10 mM NADPH solution made in Phosphate buffered saline was added to start the reaction. For the control NADPH was replaced by 50  $\mu\text{L}$  of phosphate buffer. Aliquots (10  $\mu\text{L}$ ) of this solution were then collected at various time intervals and diluted with cold acetonitrile (300  $\mu\text{L}$ ) and vigorously shaken to precipitate any protein. The aliquots were thoroughly mixed and then centrifuged at 9000 rpm for 15 min to sediment the precipitated protein. After centrifugation, a supernatant aliquot (5  $\mu\text{L}$ ) of each sample was analyzed using a Hewlett–Packard 1100 HPLC equipped with Zorbax SB-Aq 5  $\mu\text{m}$  analytical column (50 x 4.6 mm; Agilent Technologies, Inc., Palo Alto, CA). The mobile phase was a linear gradient solvent system: 5 mM TBAP (tetrabutylammonium dihydrogenphosphate)- $\text{CH}_3\text{CN}$  from 80:20 to 40:60 in 13 min; the flow rate was 0.5 mL/min. Peaks were detected by UV absorption with a diode array detector at 254 nm.

#### In rat plasma (compd. 16):

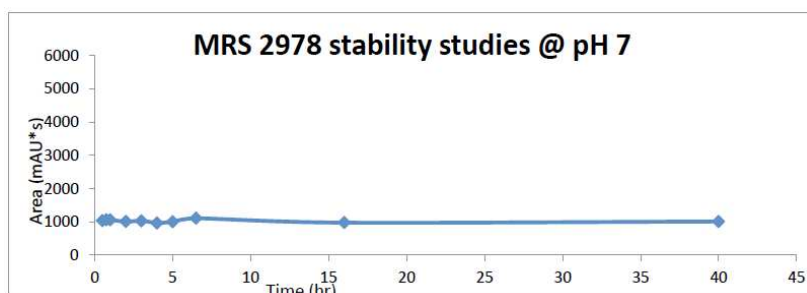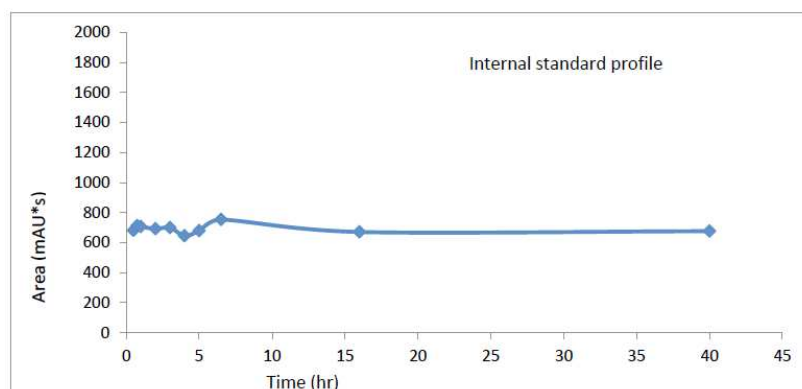

**In mouse liver microsomes (compd. 16):**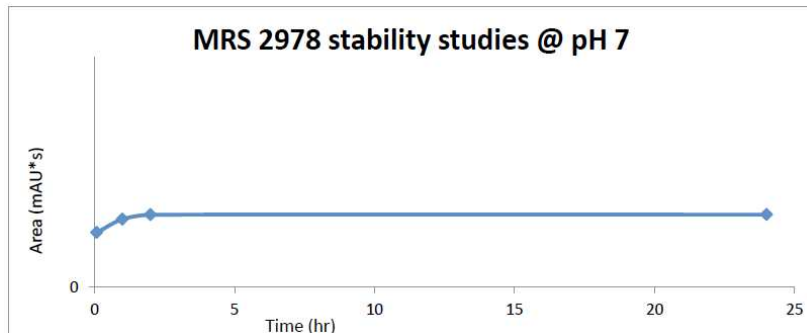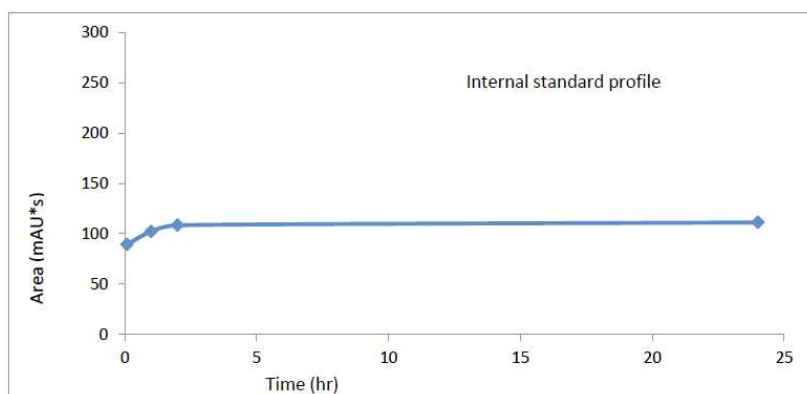**In rat liver microsomes (compd. 16):**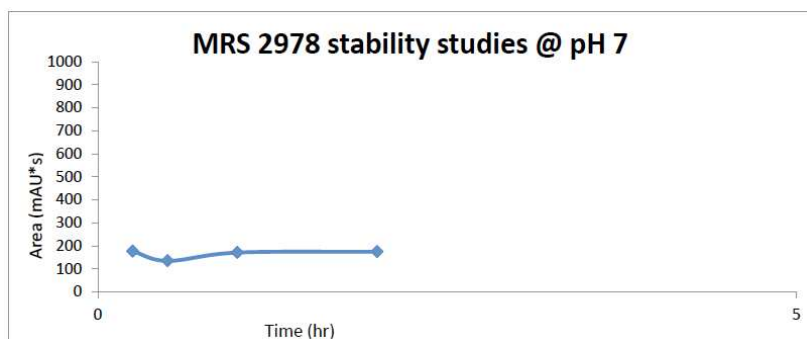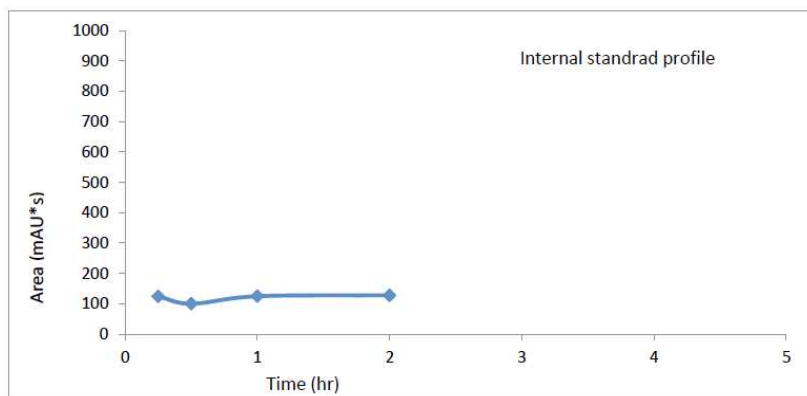

**Compound 14 in rat plasma:**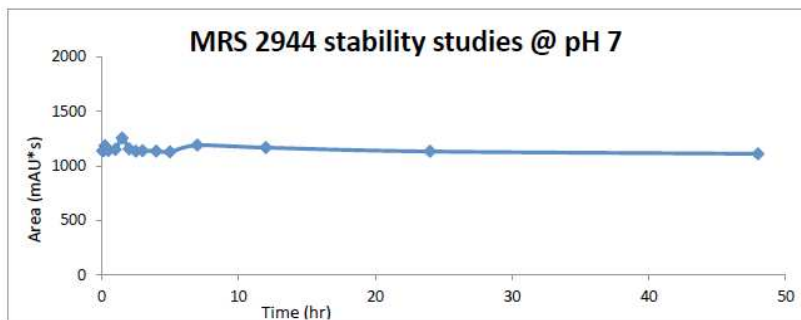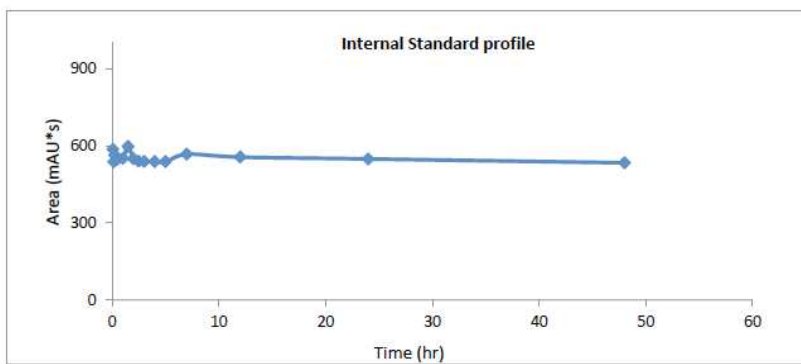

**References:**

1. Jones, L.R.; Suzuki, Y.J.; Wang, W.; Kobayashi, Y.M.; Ramesh, V.; Franzini-Armstrong, C.; Cleemann, L.; Morad, M. Regulation of Ca<sup>2+</sup> signaling in transgenic mouse cardiac myocytes overexpressing calsequestrin. *J. Clin. Invest.* **1998**, *101*, 1385-1393.
2. Knollman, B.C.; Knollmann-Ritschel, B.E.C.; Weismann, N.J.; Jones, L.R.; Morad, M. Remodeling of ionic currents in hypertrophied and failing hearts of transgenic mice overexpressing calsequestrin. *J. Physiol.* **2000**, *525*, 483-498.
3. Hu, B.; Mei, Q.; Smith, E.; Barry, W.H.; Liang, B.T. A novel cardiac inotropic phenotype with cardiac transgenic expression of human P2X<sub>4</sub> Receptor transgenic mouse. *FASEB J.* **2001**, *15*, 2739-2741.
4. Curcio, A.; Noma, T.; Prasad, S.V.N.; Wolf, M.J.; Lemaire, A.; Perrino, C.; Mao, L.; Rockman, H.A. Competitive displacement of phosphoinositide 3-kinase from  $\alpha$ -adrenergic receptor kinase-1 improves postinfarction adverse myocardial remodeling. *Am. J. Physiol. Heart Circ. Physiol.* **2006**, *291*, H1754-H1760.
5. Kumar, T.S.; Zhou, S.Y.; Joshi, B.V.; Balasubramanian, R.; Yang, T.; Liang, B.T.; Jacobson, K.A. Structure activity relationship of (N)-methanocarba phosphonate analogues of 5'-AMP as cardioprotective agents acting through a cardiac P2X receptor. *J. Med. Chem.* **2010**, *53*, 2562-2576.
6. Silvestri, M. A.; Nagarajan, M.; De Clercq, E.; Pannecouque, C.; Cushman, M. Design, Synthesis, Anti-HIV Activities, and Metabolic Stabilities of Alkenyldiarylmethane (ADAM) Non-nucleoside Reverse Transcriptase Inhibitors. *J. Med. Chem.* **2004**, *47*, 3149-3162.
7. Sun, H. Capture hydrolysis signals in the microsomal stability assay: Molecular mechanisms of the alkyl ester drug and prodrug metabolism. *Bioorg. Med. Chem. Lett.* **2012**, *22*, 989-995.
8. Singh, J. K.; Solanki, A.; Shirsath, V. S. Comparative *in-vitro* Intrinsic clearance of imipramine in multiple species liver microsomes: Human, Rat, Mouse and Dog. *J Drug Metab Toxicol.* **2012**, *3*, 4.
